# Supplementary material for: A knowledge graph representation learning approach to predict novel kinase–substrate interactions
Source: Royal Society of Chemistry journal article supplement (doi:10.1039/d1mo00521a), 2022-08-17
Supplement: d1mo00521a1.csv [file d1mo00521a1.csv]

head	tail	label	score
P45983	Q08209	0	0.0
P19784	Q9Y5B0	1	0.699049592018
P05129	P11388	1	0.752157509327
P06493	P61073	1	0.50947111845
P49841	P53396	0	0.0
Q13131	Q9UQK1	1	0.8017902970309999
P06493	Q9Y2V2	1	0.7527307271960001
P19784	Q03060	1	0.6720352172849999
Q7L7X3	O60566	0	0.0
P53350	P31431	0	0.260978549719
Q9BUB5	P47712	1	0.5632731914519999
Q16539	P41743	0	0.0
P28482	Q05209	1	0.826182961464
P19784	Q13526	1	0.659440159798
P53355	P40429	1	0.754994690418
P19784	O60674	0	0.383863866329
Q683Z8	P04637	0	0.0
Q9H4B4	P11021	0	0.0
Q04759	Q02750	1	0.6718745827670001
P19784	Q00613	1	0.740665733814
Q8IW41	O43524	1	0.744749128819
P06493	Q13586	1	0.82370275259
P28482	Q13563	1	0.7272777557369999
P31749	P54274	1	0.732747137547
P53350	P30260	1	0.805478930473
P27361	P14923	0	0.313663899899
P51812	P05114	1	0.637711346149
P28482	Q13501	1	0.783799171448
Q9BUB5	P13498	1	0.529545009136
P48729	Q9Y4G8	1	0.741822242737
Q8TD19	Q8TD19	1	0.814025461674
P27361	Q9UHB6	0	0.0
P05771	P13498	1	0.80490064621
O15530	Q16513	1	0.757930219173
P22612	Q14896	0	0.0
Q04759	P15311	1	0.736951708794
O14965	Q14203	1	0.7569722533230001
P06493	O43521	1	0.831343054771
P19784	Q99801	1	0.8230386972429999
P49840	P22415	1	0.782713592052
Q04759	P63244	0	0.3836433887479999
Q8IWU2	P11216	0	0.0
P06493	P52732	1	0.781685113907
P19784	Q13526	1	0.659440159798
P19784	Q13526	1	0.659440159798
Q92630	P35372	1	0.594774901867
P24941	P62841	0	0.39882850647
Q04759	Q5JVS0	1	0.74765765667
P22612	Q13185	0	0.0
Q9NYV4	P24928	1	0.758612155914
O14757	P52292	1	0.819480836391
Q9UBE8	P0DMV8	0	0.400656431913
O00418	O00418	1	0.759127795696
Q13976	Q76M96	1	0.7671484351160001
Q13237	P17655	1	0.647348046303
P06241	P16885	1	0.784342110157
Q92630	P17655	1	0.7269036173819999
P28482	P05198	1	0.76559317112
P17252	P62834	1	0.6349069476129999
P19784	P11836	0	0.0
P24941	P22674	1	0.777174651623
P19784	Q8WXH0	0	0.0
P06493	P07947	0	0.318010449409
P17252	Q07869	1	0.771559596062
Q92630	P17655	1	0.7269036173819999
Q7L7X3	P11912	0	0.0
Q14004	P24928	1	0.739144325256
Q05655	Q9Y698	0	0.0
Q8IWQ3	P10636	1	0.650222122669
P06241	P61586	0	0.285769850016
P12931	Q9UKW4	1	0.7542290687559999
P19784	Q13526	1	0.659440159798
P28482	P51170	0	0.0
P19784	Q13526	1	0.659440159798
Q92630	O43255	1	0.8161897659299999
Q15746	O14950	1	0.774487435818
P22607	P22607	1	0.7575570344920001
P42345	Q5T4S7	1	0.7583219408990001
O75116	P35241	1	0.670319676399
PR:000029189	O00560	0	0.0
P68400	Q9Y365	1	0.736561477184
P23443	P30050	1	0.525959253311
Q13188	Q9H8S9	1	0.764914751053
O15530	Q15700	0	0.302573472261
P51449	Q13541	0	0.0
P24723	Q06124	1	0.761336743832
P78368	Q15555	0	0.469096601009
Q04759	P63244	0	0.3836433887479999
Q8IWU2	P17813	0	0.0
Q04759	O14920	1	0.634305536747
Q13627	P55211	1	0.7707359194760001
Q13315	Q9UQR1	1	0.744130313396
Q9BYP7	Q9H4A3	1	0.774329721928
Q13882	P31749	1	0.717868030071
P17612	Q92597	1	0.7603092789650001
Q04759	Q04759	1	0.732175767422
P49840	P61586	1	0.7368424534800001
Q04759	P63244	0	0.3836433887479999
Q8TD19	Q9HC98	1	0.74308013916
Q16584	P0DMV8	0	0.472355216742
P45983	P30307	1	0.8244857192039999
P17252	P29350	1	0.7381700277330001
P27361	Q07954	1	0.644583940506
Q8N5S9	P31749	0	0.353771954775
P19784	P42768	1	0.7127698659899999
P28482	P17480	0	0.0
P28482	P08238	1	0.50659006834
P19784	P28482	1	0.674417436123
Q96RR4	Q96RR4	1	0.771586120129
Q13315	Q14191	1	0.776651322842
Q04912	Q04912	1	0.788852989674
P19784	P11836	0	0.0
P19784	Q13526	1	0.659440159798
Q02156	Q16625	1	0.796813964844
Q13188	P05023	0	0.460735917091
P06241	P51911	0	0.0
O75582	Q16695	0	0.0
O00141	O00213	1	0.73982411623
P17252	P17813	0	0.3508088886739999
P19784	Q13526	1	0.659440159798
P41279	Q15418	1	0.7207034826279999
P51948	Q8WXH0	0	0.0
Q9Y2U5	Q16512	1	0.536425232887
Q16539	Q05655	1	0.539198100567
P06239	P06239	1	0.742209792137
Q9NYL2	O96017	1	0.736589491367
Q13131	P04626	1	0.733983933926
Q6P2M8	P0DMV8	0	0.404679536819
P07948	P12318	1	0.8061513900759999
P19784	P18887	1	0.752609491348
Q02156	P46940	1	0.753579258919
P19784	Q13526	1	0.659440159798
Q9NYV4	P24928	1	0.758612155914
Q9BUB5	P45983	1	0.5485084056849999
PR:000026196	P06396	0	0.0
P41240	P41240	1	0.707597196102
O00418	Q9Y4G8	1	0.50703728199
P19784	P10451	0	0.0
P49840	Q2M1Z3	0	0.0
O14730	Q9Y4G8	0	0.0
O14920	P17655	1	0.748127698898
O14757	Q96N67	0	0.359717458487
Q9UQM7	P51790	1	0.8436871170999999
Q13131	Q9BU19	1	0.7319031357770001
Q92630	O43255	1	0.8161897659299999
P19784	P04818	1	0.7543566823010001
Q9NYV4	P24928	1	0.758612155914
P11309	O15143	1	0.5780196785930001
P04626	P31146	0	0.0
Q86Z02	P17655	1	0.5115894079209999
P12931	P78352	1	0.759673476219
Q96RR4	P50570	0	0.336255013943
P68400	P16949	1	0.7573246359829999
P17612	P48730	0	0.0
P07332	P11274	1	0.7522668838500001
Q8TD19	P26038	1	0.68233537674
Q8IWQ3	P30101	1	0.701596617699
P27361	Q08499	0	0.0
P17252	P29350	1	0.7381700277330001
P17612	P55087	1	0.8160924911499999
Q04759	Q02750	1	0.6718745827670001
P19784	Q13526	1	0.659440159798
P17252	P07355	1	0.774099051952
P06493	Q9Y6W5	1	0.773015081882
Q13188	Q13188	1	0.742818593979
Q96BR1	P06748	1	0.633308410645
P45984	O43521	1	0.7620183229449999
Q9UQM7	P31645	1	0.75849378109
Q15418	Q14451	1	0.505133152008
P17252	P22460	1	0.770929217339
Q14164	P15311	1	0.646322846413
Q8N5S9	P61978	0	0.459677010775
P12931	P23743	1	0.7507429718970001
Q99640	P06493	1	0.733408033848
P24941	Q9UEY8	1	0.7381967306139999
Q16512	P36871	0	0.46438267827
P31751	P51636	0	0.4437403976919999
P05771	P26010	0	0.257126629353
Q05513	P30086	1	0.7044641375540001
P19784	P35222	1	0.7427595853810001
P28482	P51168	0	0.0
Q92630	P61978	1	0.757400155067
Q7L7X3	O60566	0	0.0
P19784	Q13526	1	0.659440159798
Q04759	Q86UL8	0	0.0
P19784	Q13526	1	0.659440159798
Q00535	Q02750	1	0.800217568874
Q13188	P51955	1	0.7500655055050001
Q05655	P40189	1	0.760758638382
Q9HC98	P23443	1	0.725252568722
P12931	O60496	0	0.0
P27361	O60331	1	0.777664065361
Q13315	P00749	0	0.0
O15111	Q9BUZ4	1	0.736715555191
P23443	P03372	1	0.771480739117
P27361	O00429	1	0.753816485405
P78368	Q86UL8	0	0.0
Q13976	P04792	1	0.7462996244429999
Q04759	Q92934	1	0.732360839844
P49841	P62491	0	0.4342648983
P19784	Q99801	1	0.8230386972429999
Q13976	P31146	0	0.0
P21127	P31146	0	0.0
P17612	O14493	1	0.727101147175
Q15418	Q16875	1	0.794154047966
P07949	O60716	1	0.624128222466
P27361	P14923	0	0.313663899899
P17612	Q6J4K2	1	0.7991982102390001
Q8N5S9	P17655	1	0.7209476232529999
O15530	O00213	1	0.7352440357209999
P49840	Q12846	0	0.0
Q92630	P61978	1	0.757400155067
P48729	Q13144	0	0.0
P19784	Q13541	1	0.645566165447
Q16539	P35638	1	0.767525017262
Q13315	P78527	1	0.735049903393
Q92630	Q16555	1	0.72676718235
Q99558	Q96N67	0	0.305854320526
P06493	P39019	0	0.435942739248
O00418	P05023	0	0.445805698633
P27361	P05787	1	0.7458184361460001
P68400	O75496	1	0.740393340588
P67870	O95863	0	0.0
P19784	Q92769	0	0.499935805798
O00418	P11717	0	0.435261517763
Q8TD19	Q8TD19	1	0.814025461674
Q7L7X3	P27348	0	0.0
Q9UQM7	P12931	1	0.571044683456
P22694	P26038	0	0.495607435703
P68400	P01116	0	0.0
Q05513	P49841	1	0.7404742240909999
P19784	P18031	1	0.6833537817
Q15208	Q15208	1	0.747151374817
Q99558	Q00653	1	0.780702114105
Q9BYP7	P78352	0	0.473357886076
O75914	P04049	0	0.0
P78368	Q9Y5P4	1	0.732493519783
P42345	Q08209	0	0.0
P31751	P15311	1	0.739506959915
O14920	Q5S007	1	0.669326841831
P19784	Q12959	1	0.607668220997
P28482	Q14157	1	0.6646472811699999
O14757	Q15654	0	0.218575596809
P05771	Q9BXL7	1	0.702504873276
P41240	Q14118	0	0.0
O00418	P05023	0	0.445805698633
Q6P5Z2	Q6P5Z2	0	0.0
P48729	P27361	1	0.6703014373780001
Q04759	P63244	0	0.3836433887479999
Q99558	P27361	0	0.249165028334
Q13131	P52292	1	0.7885397672650001
P19784	Q13144	0	0.0
P24941	P38432	1	0.777303755283
P00533	Q14980	1	0.682580709457
Q9UEW8	Q9UHW9	1	0.7380398511890001
P19784	P18887	1	0.752609491348
P49137	Q14847	1	0.63123601675
P06493	Q96C19	1	0.744110524654
Q9NYV4	P0DMV8	1	0.507905125618
Q13535	Q00987	1	0.7376470565800001
Q99640	P35372	1	0.6082378029819999
P17612	Q9Y6E0	1	0.742509901524
O00418	O00418	1	0.759127795696
Q92630	P50570	1	0.704724311829
O15530	P63000	1	0.646409630775
P12931	P37840	1	0.7750285267829999
P19784	Q13547	0	0.499462634325
P17612	P29966	1	0.782674252987
P19784	Q13526	1	0.659440159798
O95835	Q9GZV5	1	0.650497734547
P19784	P52655	0	0.0
Q13554	P19022	0	0.310384482145
Q13188	P05023	0	0.460735917091
Q14680	Q16625	1	0.718201398849
P19784	P61978	1	0.669564723969
P68400	P08833	1	0.741687715054
Q04759	P63244	0	0.3836433887479999
P19784	Q9UNN4	0	0.0
Q9BUB5	P06730	1	0.761999249458
P19784	P61978	1	0.669564723969
P22694	Q14896	1	0.579203128815
P17612	Q9UJY1	1	0.7393440008159999
P17612	P36956	1	0.763954162598
P17252	P35611	1	0.753064393997
O14920	Q9BXH1	1	0.7535719275470001
Q8TD19	Q8TD19	1	0.814025461674
Q15208	Q86UL8	0	0.0
P42345	O00418	1	0.744101166725
P19784	Q13085	0	0.352740854025
P31751	Q92974	1	0.685215115547
Q9BWU1	O00303	1	0.761020243168
O75914	Q9Y4G8	0	0.0
P19784	O43896	0	0.0
Q8TD19	Q8TDX7	1	0.7412648200990001
P08637	P05023	0	0.0
P19784	P55087	1	0.692131102085
P17612	P25098	1	0.7797628045080001
Q13535	P35372	0	0.474466890097
P19784	Q13526	1	0.659440159798
P19784	P28482	1	0.674417436123
Q9P286	P15976	1	0.7576269507410001
Q6IQ55	Q7L0J3	1	0.780735194683
P27361	P12931	1	0.641103386879
P28482	Q86WV6	0	0.352522462606
Q9NYV4	P24928	1	0.758612155914
Q9BUB5	P45983	1	0.5485084056849999
P07947	Q16543	1	0.7337247729299999
P31749	O00213	1	0.698707580566
P19784	P35372	1	0.735808432102
P17252	Q14676	1	0.6127434372899999
P49841	Q14494	1	0.7384040355679999
P31749	P39019	1	0.7014395594600001
O75582	Q86UL8	0	0.0
Q38SD2	Q96SN8	1	0.771395146847
P17612	P98082	1	0.751157522202
Q92630	P01106	1	0.7877938151360001
P06493	Q9Y624	0	0.290777891874
Q92630	O43255	1	0.8161897659299999
Q9NYV4	P31146	0	0.0
P45983	P31947	1	0.776958882809
P31751	P13861	0	0.0
P06493	P23396	1	0.76531881094
P19784	Q01105	0	0.0
P68400	P50895	1	0.737995505333
Q00535	Q13153	1	0.614120364189
Q8IYT8	A2RUS2	1	0.735693454742
P51812	Q13418	0	0.476763814688
P12931	Q14289	1	0.743614017963
P05771	P63328	0	0.0
P17612	Q96PU5	1	0.7868928909299999
Q13188	Q13188	1	0.742818593979
Q9BYP7	P55011	1	0.673139750957
P19784	Q9UNN4	0	0.0
Q13177	P05412	1	0.7743307352069999
Q13418	P31749	1	0.7171106934550001
P19784	Q13526	1	0.659440159798
P19784	Q13526	1	0.659440159798
Q04759	P63244	0	0.3836433887479999
Q13315	O96017	1	0.7916272282600001
P24941	P05556	0	0.478460788727
O14757	P49790	1	0.7289299964899999
P06241	P24666	1	0.7502020597460001
Q13554	Q9NQC7	1	0.610788881779
Q04759	P28482	1	0.661473631859
Q13131	P50552	1	0.792451739311
P17252	P29350	1	0.7381700277330001
Q04759	Q5JVS0	1	0.74765765667
P19784	P50281	1	0.7301897406579999
P24941	P29374	1	0.804092228413
Q9NQU5	Q14118	0	0.0
P27448	Q86UL8	0	0.0
Q9HCP0	Q12778	1	0.643072485924
P28482	P32004	1	0.798099815845
Q7L7X3	Q7KZI7	0	0.0
P49841	Q14194	1	0.6955114007
P54646	P60953	0	0.0
Q16816	Q14118	0	0.0
P19784	Q9UQE7	1	0.788885235786
O75914	P11717	0	0.0
P68400	Q92466	0	0.0
P19784	Q12972	0	0.252782464027
P17252	P19021	0	0.0
Q9UHD2	Q01094	1	0.7525157928470001
P45983	P05129	0	0.0
P68400	P31749	1	0.7318162918089999
P24941	Q14676	1	0.757312476635
Q8N5S9	P61978	0	0.459677010775
P11309	Q9BZS1	1	0.746937155724
Q8TDX7	P23443	0	0.0
P19784	Q13526	1	0.659440159798
Q8N5S9	Q16566	1	0.8075488805769999
O14920	P31645	1	0.6831786632539999
Q92630	O15511	1	0.533122599125
Q00535	P07814	1	0.774488985538
Q15418	Q15366	0	0.0
Q9UBE8	Q8N122	1	0.7688739895819999
Q9NYV4	P31146	0	0.0
Q9NYV4	O60716	1	0.528267145157
P06493	O00267	1	0.784980356693
Q13315	P16070	1	0.569354653358
Q06187	P51813	1	0.741289258003
O75914	P19429	0	0.0
Q13627	P24928	1	0.75183480978
P19784	Q9Y5B0	1	0.699049592018
P22612	Q8WXH0	0	0.0
P27361	Q7L0J3	1	0.6356906294820001
P17252	P62834	1	0.6349069476129999
P25098	P13498	1	0.592835605145
Q9HC98	P52948	1	0.682550430298
P31751	Q92908	0	0.374732851982
P31749	Q6PIY7	0	0.0
Q9NYV4	P24928	1	0.758612155914
P19784	P11021	0	0.0
Q13188	Q9H8S9	1	0.764914751053
Q8TD19	P0DMV8	1	0.655562579632
Q04759	P28482	1	0.661473631859
P06493	P23396	1	0.76531881094
P31751	P14923	1	0.500531435013
P24941	Q9H6K1	1	0.746268689632
P49841	P17275	1	0.754629075527
Q9NQU5	Q92934	1	0.614774942398
Q15382	P15056	0	0.0
P36897	Q12959	1	0.579506456852
P19784	Q15599	0	0.371772289276
P19784	Q13526	1	0.659440159798
P49840	P35222	1	0.748575091362
Q9HC98	O43707	0	0.0
P24941	Q9H7L9	1	0.8519654870029999
Q9BUB5	P23246	1	0.7460226416590001
P19784	Q12959	1	0.607668220997
Q9BUB5	P09651	1	0.765272200108
P28482	Q8IZP0	1	0.7792584300040001
P41240	P09769	0	0.0
Q05513	P60953	0	0.0
P17612	Q92597	1	0.7603092789650001
P00519	O15269	1	0.738006472588
P06239	Q9BWW4	1	0.757126808167
P19784	P17096	0	0.499491542578
Q8N5S9	P11912	0	0.0
Q96RR4	Q8IU85	1	0.716191589832
Q13237	Q8WXH0	0	0.0
Q04759	P15311	1	0.736951708794
P42336	P23443	1	0.7375198602680001
P68400	Q92542	1	0.658125936985
P17252	O95644	1	0.7511689066889999
P53779	P08670	1	0.704619884491
Q9HC98	O00141	1	0.7305681705470001
P28482	P42261	1	0.612111747265
P06239	Q9Y6W5	0	0.4544261097909999
Q15139	Q9UBF8	0	0.261744022369
P19784	Q13526	1	0.659440159798
Q96RR4	P54646	1	0.6294137239459999
Q99558	Q00653	1	0.780702114105
P17252	P11233	1	0.648058533669
P27361	Q96Q27	1	0.7805538773540001
Q13535	Q8WXH0	0	0.0
Q04759	Q92934	1	0.732360839844
P19784	Q13526	1	0.659440159798
Q13188	O95835	1	0.7472071647640001
Q16539	O15198	1	0.769419491291
P41279	P19022	0	0.223848760128
P19784	Q9UD71	1	0.724118173122
P31751	P27348	0	0.43152731657
Q16539	P21462	1	0.742378234863
O75914	P04040	0	0.0
P19784	P21673	1	0.626476049423
P19784	P06748	1	0.724540114403
Q683Z8	Q03135	0	0.0
Q8N5S9	Q8IU85	1	0.760897755623
P11362	Q9UBW7	1	0.76204842329
Q7L7X3	O60566	0	0.0
Q16539	P29350	0	0.429882377386
P17612	Q7Z2W7	1	0.76675003767
Q9NYV4	O00560	0	0.4816414117809999
P12931	P42858	0	0.386525630951
Q13882	Q9NRY4	0	0.3424747884269999
P48729	Q8TB45	1	0.744352519512
P67870	P08473	0	0.0
P19784	P28482	1	0.674417436123
Q04759	P28482	1	0.661473631859
P06493	P61073	1	0.50947111845
P51812	P49840	1	0.731111943722
Q9H2X6	P18846	1	0.554438054562
Q13188	O95835	1	0.7472071647640001
P68400	Q92974	1	0.6959679126739999
P27361	O75582	1	0.7504974603650001
O75914	P04049	0	0.0
A9UF07	P05023	0	0.0
Q04759	P63244	0	0.3836433887479999
Q9BUB5	P45983	1	0.5485084056849999
Q13188	P51955	1	0.7500655055050001
O75914	P31146	0	0.0
P22694	Q14896	1	0.579203128815
P22612	Q92934	0	0.0
O14757	Q14118	0	0.0
Q8TD19	Q8TDX7	1	0.7412648200990001
P19784	Q02750	1	0.719970703125
P19784	P28482	1	0.674417436123
Q92630	P31645	1	0.680454552174
P43405	P31995	1	0.7514399886130001
P19784	P51636	1	0.6398527622219999
P06493	P16615	0	0.0
P19784	Q13526	1	0.659440159798
P31751	O15511	1	0.623799085617
P05771	P14679	1	0.828177392483
P12931	O14976	0	0.0
Q04759	P63244	0	0.3836433887479999
P49137	O15511	1	0.776220500469
P19784	Q9NZU7	0	0.0
P19784	Q13526	1	0.659440159798
Q16816	P04040	0	0.0
P42345	O75912	0	0.0
Q96GD4	P82970	1	0.830872476101
P31751	P98177	1	0.684435009956
Q13237	P50552	1	0.728244781494
P68400	Q96PX8	1	0.784176409245
P22694	P0DMV8	1	0.547976732254
Q9NYV4	P24928	1	0.758612155914
O95382	P04040	0	0.476914852858
Q13315	Q9Y6K9	1	0.767483472824
P19784	P17096	0	0.499491542578
Q99640	O75955	0	0.475238621235
P42684	P10636	1	0.6073624491690001
P78368	Q12959	1	0.616313636303
Q86Z02	O60829	1	0.7901670932770001
P28482	Q86WV6	0	0.352522462606
P17252	O76090	1	0.752493083477
P22612	P28482	0	0.0
P31749	Q86V81	1	0.80219656229
P28482	P08238	1	0.50659006834
P19784	Q13526	1	0.659440159798
O14757	Q6PD62	1	0.7454275488850001
Q9HC98	P23443	1	0.725252568722
Q99640	P06493	1	0.733408033848
P42684	O14818	1	0.746299088001
P17612	P47736	1	0.764219582081
P53350	O15143	1	0.7149378657340001
Q9HC98	Q14118	0	0.0
P19784	Q13526	1	0.659440159798
P17252	P01730	1	0.7792624831199999
P49137	Q14451	0	0.454725205898
Q9NYL2	Q14155	1	0.58292299509
Q15418	P30050	0	0.45837700367
Q92630	Q02750	1	0.7535161376
P17252	P29350	1	0.7381700277330001
P51955	Q9BV73	1	0.7637407779690001
P17252	P25054	1	0.6613445281979999
Q9UQ88	P04040	0	0.402141690254
Q99640	P11021	0	0.0
P19784	Q01892	0	0.0
P24723	P06396	0	0.322760760784
Q04759	O15530	1	0.597700715065
PR:000029189	P46937	0	0.0
Q9HC98	P0DMV8	1	0.768068909645
P68400	Q08945	1	0.794308483601
O75914	Q05682	0	0.0
Q05655	P61978	1	0.767817556858
Q92630	Q14195	1	0.7674558162690001
P19784	Q9UNN4	0	0.0
P51812	P31431	0	0.315593659878
P19784	P49795	1	0.754772663116
Q8TD19	P27361	0	0.479736983776
Q99558	P0DMV8	1	0.653434991837
P19784	Q01892	0	0.0
Q04759	P61978	1	0.696418225765
P68400	P01116	0	0.0
P24941	Q6UB35	1	0.759744524956
Q05655	Q16236	1	0.582911729813
P19784	Q13526	1	0.659440159798
O00418	Q13418	1	0.532462000847
A0A173G4P4	Q06609	0	0.0
Q99640	P06493	1	0.733408033848
P06493	O00311	1	0.7344719171520001
P08637	P06239	0	0.0
P53778	P13861	0	0.0
P19784	Q12959	1	0.607668220997
Q13177	P27824	1	0.500786244869
P45983	P63104	1	0.7629411220550001
P68400	P13349	1	0.750734627247
Q13188	O95835	1	0.7472071647640001
Q9NYV4	Q9NYV4	1	0.54905962944
P42680	O75955	1	0.811860799789
P12931	P35790	1	0.7503492236139999
Q7L7X3	O60566	0	0.0
P24941	P23511	0	0.0
P19784	Q01892	0	0.0
P19784	Q13526	1	0.659440159798
P19784	Q13526	1	0.659440159798
Q96GD4	Q69YH5	1	0.746384620667
P19784	Q13526	1	0.659440159798
P24941	Q96T88	1	0.828635215759
P45983	Q8N122	1	0.777622818947
Q16816	Q16816	0	0.0
Q04759	P63244	0	0.3836433887479999
Q05655	P13498	1	0.7450273633
P19784	Q13526	1	0.659440159798
P17252	P62834	1	0.6349069476129999
P27361	P29353	1	0.7582026720049999
Q9H2X6	O43707	0	0.0
P22694	Q14896	1	0.579203128815
P19784	Q12972	0	0.252782464027
Q04759	P26038	1	0.743601441383
Q05655	P05787	1	0.7394016385079999
Q9UQM7	P39019	1	0.697922289371
Q13976	P78347	1	0.75946700573
P19784	Q05940	1	0.631922781467
P43250	P43250	1	0.720556914806
Q13131	O00429	1	0.67772769928
Q13555	Q03060	1	0.606078982353
P28482	Q9Y4K1	0	0.0
P19784	Q6FHW4	0	0.0
Q92630	Q86UL8	0	0.0
P53778	O00418	1	0.65889775753
Q9NYV4	P13498	1	0.524171113968
Q15569	Q15569	0	0.0
Q6P5Z2	Q6P5Z2	0	0.0
P68400	P01116	0	0.0
Q04759	P63244	0	0.3836433887479999
Q13233	Q13158	1	0.738234102726
Q8TD19	Q8TD19	1	0.814025461674
Q05655	Q96C90	1	0.785713255405
P78527	P14859	1	0.779436767101
Q9NYV4	P24928	1	0.758612155914
P68400	Q16625	1	0.758927166462
P19784	P84090	0	0.0
P31751	Q9Y3M2	1	0.7398355603219999
Q13131	P07355	1	0.802242875099
P17612	Q14254	0	0.230358526111
Q13188	Q14511	0	0.402801781893
P24941	O15014	1	0.773759841919
P11309	O14974	1	0.739586174488
O15111	Q9Y6Q9	1	0.736523449421
P19784	P09497	0	0.496954739094
P19784	Q13526	1	0.659440159798
P53355	Q9ULV4	0	0.323221474886
Q15418	Q14511	1	0.572108566761
Q04759	P28482	1	0.661473631859
Q96BR1	P49841	1	0.738835155964
Q07912	Q96SB3	0	0.0
Q13882	Q15366	0	0.0
P19784	Q13526	1	0.659440159798
Q16816	P10636	0	0.0
Q04759	O14920	1	0.634305536747
P19784	Q9Y5B0	1	0.699049592018
Q14164	P49840	1	0.7414022088050001
P27361	Q07889	1	0.799701273441
P19784	Q13526	1	0.659440159798
P06493	P39019	0	0.435942739248
P06493	P39019	0	0.435942739248
P19784	Q13526	1	0.659440159798
P00519	Q13177	1	0.614827513695
P19784	P24534	0	0.0
P19784	Q13526	1	0.659440159798
Q9NYV4	O60716	1	0.528267145157
P78527	Q96QB1	1	0.682527244091
P19784	P55087	1	0.692131102085
Q8TD19	Q8TD19	1	0.814025461674
P31749	Q9UN36	1	0.751357913017
Q96GD4	P60953	0	0.0
P12931	P30556	1	0.756104528904
P19784	Q13526	1	0.659440159798
P41743	Q7KZI7	1	0.7471121549609999
Q13315	P16104	0	0.0
Q9HC98	Q08345	1	0.740598201752
P24723	P04040	1	0.533475458622
P19784	P04083	1	0.729670703411
Q96GD4	Q8IX90	0	0.0
P19784	Q13526	1	0.659440159798
Q04759	P63244	0	0.3836433887479999
Q13153	P78545	1	0.736985325813
P27361	P14923	0	0.313663899899
O14757	P67870	1	0.75536108017
Q9Y3S1	Q9UEW8	1	0.747551202774
P24941	P05556	0	0.478460788727
P51813	Q8TDY4	1	0.720643103123
P68400	Q16832	0	0.403285890818
P51812	P04637	1	0.809587419033
P00533	O00161	0	0.0
P19784	P55957	0	0.38791128993
P28482	O60331	1	0.803584694862
P17612	P39019	1	0.733937263489
Q13976	Q13418	1	0.578563094139
P68400	P28482	1	0.780690908432
Q04759	P61978	1	0.696418225765
P42345	Q14289	0	0.265748172998
Q8IYT8	P0DMV8	1	0.569397687912
P49841	Q9UQB3	0	0.0
Q9Y3S1	P13861	0	0.0
P48729	Q03060	1	0.625456273556
P19784	P11021	0	0.0
P49840	P14923	0	0.412763088942
P17252	Q03721	1	0.772322297096
P19784	Q9UNN4	0	0.0
P31751	P61073	1	0.710489928722
P50613	O60674	0	0.43490755558
P19784	P17655	1	0.690097808838
P12931	P42858	0	0.386525630951
Q13976	P62280	1	0.510502338409
P19784	Q13526	1	0.659440159798
Q9BUB5	O43597	1	0.7552831768989999
Q05655	P17655	1	0.7518576979639999
P42684	P04040	1	0.73273473978
P68400	P01116	0	0.0
Q04759	P29474	1	0.685855269432
O14757	Q14118	0	0.0
Q92630	Q14194	1	0.7675362825390001
P49137	Q13151	1	0.7935559749600001
O14757	Q9HB96	1	0.7608789205550001
P06493	Q99638	1	0.808578073978
Q9HC98	Q03135	0	0.372435569763
O96013	P49023	1	0.621022224426
P19784	P52655	0	0.0
P12931	P11511	1	0.7363917231559999
P17252	Q92837	1	0.7412695288660001
Q15208	P27348	0	0.468706667423
P28482	P41743	0	0.0
O14757	Q13418	1	0.535957634449
P24941	P07947	0	0.318547993898
Q9NYV4	P24928	1	0.758612155914
P28482	Q9P2Y5	0	0.4492690563199999
Q04759	Q9UEW8	1	0.7398825883869999
P31749	P47870	0	0.0
P19784	Q8WXH0	0	0.0
P17252	Q14289	0	0.358200192451
Q16539	O43521	1	0.764353871346
Q14680	Q86UL8	0	0.0
P19784	P67870	1	0.736669063568
Q16539	Q9UL54	0	0.0
Q14680	P61978	1	0.673315942287
Q13188	P13498	0	0.493947863579
Q86Y07	Q9UHP3	1	0.735378444195
P06241	Q16625	1	0.675357818604
Q13976	Q03393	1	0.768383204937
P07947	O00560	1	0.627139687538
Q15831	Q9H093	1	0.7421299219130001
P78527	P52945	1	0.748339831829
P24941	Q92542	0	0.268515884876
Q13315	Q15831	1	0.629317700863
Q13315	P00749	0	0.0
Q9NYV4	Q8TEW0	0	0.445936709642
P49841	Q9Y624	0	0.280618965626
O75116	Q02750	1	0.7317782044410001
Q9UQM7	O00631	1	0.7530627846719999
Q04759	Q9UEW8	1	0.7398825883869999
Q16539	Q05209	1	0.8388833403589999
Q13188	P62745	0	0.304164230824
Q9BUB5	P09651	1	0.765272200108
Q14164	P15311	1	0.646322846413
P43250	P04040	1	0.671030342579
P53350	P35241	1	0.580795943737
Q96GD4	P26038	1	0.696784734726
P19784	Q16623	1	0.555664002895
Q13188	Q9H4B6	1	0.8487049937250001
Q04759	Q3V6T2	1	0.788406789303
P24941	P05556	0	0.478460788727
Q9HC98	P46783	1	0.559139668941
Q9P1W9	O00161	0	0.0
O75914	Q05682	0	0.0
P07948	Q13873	0	0.0
Q04759	Q3V6T2	1	0.788406789303
P05771	P20700	0	0.412980794907
P17612	O14786	0	0.0
Q96RR4	Q14012	1	0.764020562172
Q6IQ55	Q7L0J3	1	0.780735194683
P19784	P13861	0	0.0
Q9BUB5	O43597	1	0.7552831768989999
Q8N5S9	P19022	0	0.375038176775
P12931	Q08209	0	0.0
P49137	Q96J92	1	0.734991014004
O14757	Q14118	0	0.0
P53778	P13861	0	0.0
P68400	O14950	1	0.773420393467
Q9BUB5	P04792	1	0.727854847908
Q13237	Q86UL8	0	0.0
Q04759	P01116	0	0.0
P12931	P35916	1	0.743744492531
P07948	P52799	0	0.0
Q13555	P0DMV8	1	0.5312213301659999
P27361	P14923	0	0.313663899899
P00519	Q15139	1	0.659159779549
P05129	P28482	1	0.6100640892979999
Q15746	P21333	1	0.578694105148
Q13555	P26038	1	0.547206282616
Q9UQM7	Q15121	1	0.650684952736
O14965	P53671	1	0.735262513161
Q00535	O60331	1	0.7985227108
P28482	P49841	1	0.751750469208
P28482	Q9P2Y5	0	0.4492690563199999
P43405	Q92918	0	0.467712253332
P31749	P29475	0	0.0
Q9NQU5	P62834	0	0.309275835752
Q13464	Q16555	1	0.758993923664
Q96QT4	P13861	0	0.0
Q13535	Q8WXH0	0	0.0
P19784	Q13085	0	0.352740854025
P19784	Q01892	0	0.0
Q04759	Q9BXL7	1	0.759741425514
Q9HC98	P11717	1	0.5030362606050001
P50613	P04083	0	0.490622460842
P19784	Q13526	1	0.659440159798
P05771	P13498	1	0.80490064621
Q99558	P41743	0	0.0
Q13315	P00749	0	0.0
P06239	Q08881	1	0.795081973076
P19784	P15311	1	0.617316782475
Q92630	P17655	1	0.7269036173819999
Q9NQU5	P18206	0	0.0
P19784	P24534	0	0.0
Q86Z02	Q9UER7	1	0.562249302864
PR:000026457	Q8TDY4	0	0.0
Q14012	P46527	1	0.7326664328579999
P17612	P04049	1	0.7886372208600001
Q13976	O76074	1	0.771827280521
Q96RR4	Q96RR4	1	0.771586120129
Q9UQ88	O95238	1	0.7794711589810001
Q9Y3S1	Q12959	1	0.6875065565109999
P27361	P17655	1	0.8060268759729999
Q13131	P08670	1	0.694088280201
Q13188	Q03135	0	0.253197848797
Q05655	P54764	0	0.324921280146
Q9NYV4	O00560	0	0.4816414117809999
P17252	Q05940	1	0.732027232647
Q96RR4	Q96EB6	1	0.510801196098
Q15349	P05023	0	0.49734762311
Q04759	P63244	0	0.3836433887479999
P17252	Q15139	1	0.743699491024
P49840	P20749	1	0.7392497658730001
Q13315	O14757	1	0.762731790543
Q9BUB5	P09651	1	0.765272200108
O14757	P32004	1	0.726589381695
Q9Y243	P04792	1	0.6144320964810001
P19784	Q13526	1	0.659440159798
P54646	Q13177	1	0.741440951824
O14965	O60674	0	0.358843922615
P28482	Q13501	1	0.783799171448
P68400	Q13422	0	0.294109970331
Q13315	Q6UWZ7	1	0.8062786459919999
P51449	Q96RL1	0	0.0
P05771	Q8TEW0	1	0.82923913002
P19784	Q13526	1	0.659440159798
P31749	P05455	1	0.630108237267
P19784	Q13526	1	0.659440159798
P17252	P62834	1	0.6349069476129999
Q8TD19	P0DMV8	1	0.655562579632
P28482	P35658	1	0.755602240562
Q7L7X3	P61073	0	0.0
Q9BWU1	P31645	1	0.657108068466
P42345	Q14289	0	0.265748172998
O00418	P13639	1	0.558184087276
P12931	P41743	0	0.0
Q13188	P13498	0	0.493947863579
Q96RR4	P27348	1	0.562970101833
O00418	O00418	1	0.759127795696
P49841	Q09470	0	0.35616350174
P19784	P18031	1	0.6833537817
P19784	P17655	1	0.690097808838
P00519	Q9UPY6	0	0.0
Q8N5S9	P31749	0	0.353771954775
O14965	Q02224	0	0.436883717775
Q9NQU5	O00560	0	0.442859202623
P28482	Q6NZI2	0	0.428719907999
P24941	O75179	1	0.791905939579
Q05655	P17655	1	0.7518576979639999
P11802	P28749	1	0.7717956900599999
P17612	P39019	1	0.733937263489
Q8TD19	P04040	1	0.642661988735
P49841	Q15910	1	0.768059313297
Q15418	P22736	1	0.710546076298
P21127	O00303	1	0.731537640095
P28482	Q07889	1	0.801130354404
Q9BUB5	Q9BR76	1	0.525458216667
P31751	P14923	1	0.500531435013
Q13535	O00203	0	0.0
P00533	O14828	0	0.0
P19784	P51946	1	0.774058461189
P31749	Q92793	1	0.7506702542300001
Q92630	O43255	1	0.8161897659299999
Q04759	P41594	0	0.0
P19784	Q13526	1	0.659440159798
P19784	Q13144	0	0.0
P11309	Q9UNQ0	1	0.753373026848
Q96RR4	Q02750	1	0.680200815201
P41743	P15311	1	0.756016373634
P19784	P04792	1	0.6728708148
Q8TAI7	P31749	0	0.0
Q99558	Q00653	1	0.780702114105
Q9UEE5	P04637	0	0.0
Q04759	P63244	0	0.3836433887479999
P17612	Q14254	0	0.230358526111
P68400	O95819	0	0.0
P19784	P21673	1	0.626476049423
Q7KZI7	O15511	1	0.7267820835109999
Q00535	Q14254	0	0.242751330137
P19784	P13861	0	0.0
P06241	P12931	1	0.719506919384
P19784	P42768	1	0.7127698659899999
P49841	Q96R06	1	0.823018372059
P45983	Q16621	1	0.7359802126880001
P19784	Q8WXH0	0	0.0
Q13315	P00749	0	0.0
Q13315	P62917	0	0.419018536806
Q9BYP7	Q9UHW9	1	0.752076089382
Q13188	P18754	1	0.606453418732
P19784	P04792	1	0.6728708148
P19784	Q9Y5B0	1	0.699049592018
P45983	Q9NPI6	1	0.807901322842
P19784	P11021	0	0.0
P19784	Q8WXH0	0	0.0
P49841	P36956	1	0.797168970108
P36888	P36888	1	0.7535007596019999
P19784	O15511	1	0.65523314476
P06493	P23396	1	0.76531881094
P19784	Q13526	1	0.659440159798
P19784	P61978	1	0.669564723969
P00519	P00519	1	0.7881331443790001
Q13464	P41743	0	0.0
P42345	P62258	1	0.50432240963
Q9Y6K9	P25963	0	0.0
P48729	P31146	0	0.0
Q92630	O43255	1	0.8161897659299999
P19784	P18887	1	0.752609491348
P22694	P13498	1	0.600073337555
P19784	Q13526	1	0.659440159798
P19784	P17096	0	0.499491542578
Q9BYP7	Q9UHW9	1	0.752076089382
P19784	Q14005	1	0.66371768713
Q96RG2	P68104	1	0.7681608200069999
Q6IQ55	Q7L0J3	1	0.780735194683
Q13233	O75955	0	0.290670335293
P19784	P52655	0	0.0
P19784	Q13526	1	0.659440159798
Q9NQU5	P53667	1	0.748220860958
P24941	P10721	0	0.438783943653
Q9NYV4	Q14118	0	0.0
P19784	Q13526	1	0.659440159798
P19784	Q13526	1	0.659440159798
P31751	Q9UBK2	0	0.394579917192
Q13188	Q9Y4G8	1	0.636284947395
P11802	Q08999	1	0.7669032812119999
Q04759	P19022	0	0.291966617107
Q04759	P11021	0	0.0
Q16512	Q6UVK1	0	0.0
O14757	Q9Y4G8	1	0.687135994434
O15111	Q02750	1	0.681091070175
Q15418	P30050	0	0.45837700367
Q92630	Q9Y2V2	1	0.768495619297
P17612	Q14254	0	0.230358526111
Q92630	Q9UHD2	1	0.7332796454430001
P57059	Q03135	1	0.556467175484
P78527	P15927	1	0.7261751294140001
P06493	O60610	1	0.7637085318569999
Q05655	O15511	1	0.7013815641399999
P78527	Q00839	1	0.738082826138
P27361	Q96QB1	1	0.634925544262
Q02156	O75689	1	0.8022192716600001
Q99558	O14920	1	0.752337217331
Q9NYV4	Q9NYV4	1	0.54905962944
Q96RR4	P61978	0	0.482528597116
P17252	P10275	1	0.7300758957860001
P19784	Q13547	0	0.499462634325
Q8IW41	P13498	0	0.472535341978
P17252	Q9NRD5	1	0.6188285946850001
P78368	Q14457	1	0.749043166637
P19784	Q13526	1	0.659440159798
P19784	Q13526	1	0.659440159798
P43405	P51587	0	0.471286326647
O00418	O00418	1	0.759127795696
P27361	Q86UC2	1	0.775225460529
Q8TD19	Q14118	0	0.0
Q5S007	P78352	0	0.441391766071
P19784	P35372	1	0.735808432102
P43405	P37840	1	0.788836598396
P31749	Q09470	1	0.684409856796
P23443	Q13418	1	0.737173497677
Q04759	Q02750	1	0.6718745827670001
P68400	Q92681	1	0.710706591606
P19784	P11836	0	0.0
P06241	P05067	1	0.739329874516
P31751	P04792	1	0.669275999069
Q8N5S9	Q16566	1	0.8075488805769999
P00533	Q14980	1	0.682580709457
Q04759	P04083	1	0.7293868660930001
Q13976	P31146	0	0.0
P19784	P52655	0	0.0
P08922	Q06124	0	0.0
Q9UKI8	O60716	0	0.367623448372
O14965	O60674	0	0.358843922615
P10398	Q15599	1	0.742986857891
P51449	Q12959	0	0.0
P19784	Q03135	0	0.297457069159
Q9Y5P4	Q14118	0	0.0
P49137	Q9Y4G8	1	0.716136276722
Q9Y243	O75955	0	0.4215582609179999
Q96GD4	Q9BXS6	1	0.776667356491
Q04759	P63244	0	0.3836433887479999
A0A173G4P4	O00560	0	0.0
P27448	P28482	0	0.4673714339729999
Q6IQ55	P61978	1	0.541594028473
Q9HC98	P40763	1	0.7250550985340001
P17612	Q96CW1	0	0.248784810305
Q13188	P05023	0	0.460735917091
Q13188	O95835	1	0.7472071647640001
O75914	Q9UM54	0	0.0
P19784	Q13526	1	0.659440159798
P12931	Q05193	1	0.604680001736
P42345	Q8TB45	1	0.7562567591670001
P53779	P13498	0	0.369937241077
P24941	P49459	1	0.744061052799
Q8IW41	P31152	0	0.0
P19784	P28482	1	0.674417436123
P19784	P09497	0	0.496954739094
Q04759	P63244	0	0.3836433887479999
O00418	O00418	1	0.759127795696
P06493	Q02952	1	0.750038206577
Q13188	Q9H8S9	1	0.764914751053
P27361	Q13586	1	0.7790313363079999
Q9NYV4	P24928	1	0.758612155914
P19784	Q9NZU7	0	0.0
Q15569	P04040	0	0.488445281982
P49137	P63104	1	0.7419897317890001
O14965	O60674	0	0.358843922615
Q9UQM7	Q96PH1	0	0.0
Q9H4B4	Q02750	1	0.698766946793
P19784	Q13526	1	0.659440159798
P48730	P43629	1	0.747941732407
P27448	P30307	1	0.738005280495
P17252	P29350	1	0.7381700277330001
P43403	P08473	0	0.362897872925
Q13188	Q8TEW0	1	0.710766673088
O00418	P13639	1	0.558184087276
P19784	P11021	0	0.0
P19784	Q13526	1	0.659440159798
P22612	P13861	0	0.0
Q9UQM7	Q96CW1	0	0.2267020344729999
P19784	Q13526	1	0.659440159798
P22612	Q92934	0	0.0
P31749	Q15910	1	0.730075418949
P06493	P06702	1	0.835089564323
Q02156	Q13153	0	0.449570596218
O00418	Q13418	1	0.532462000847
Q9BYP7	Q8TEW0	1	0.6816470623019999
P06241	Q8WX93	1	0.541563868523
P19784	P28482	1	0.674417436123
P28482	Q04637	1	0.7542909979819999
Q8N5S9	Q14012	1	0.738992929459
P17252	P53004	1	0.747925877571
Q13237	Q12778	1	0.624436616898
P17252	O60500	1	0.740333855152
P19784	Q13526	1	0.659440159798
O15530	Q9HBY8	1	0.7618538737299999
Q13153	P54764	0	0.3541849851609999
Q92630	Q9Y2V2	1	0.768495619297
O15111	P31645	1	0.7191208601000001
P17612	O14649	1	0.793493568897
P53779	P16949	1	0.6163739562030001
P19784	Q13526	1	0.659440159798
P17612	P98082	1	0.751157522202
P53350	Q9Y266	1	0.8017624616619999
P68400	Q9UJY5	1	0.7373369932170001
P68400	P07910	1	0.7520036101340001
P28482	P06239	1	0.690397918224
P53350	Q9NS56	1	0.737441897392
P43250	P07550	1	0.731633484364
Q8TD19	Q8TD19	1	0.814025461674
P42345	Q9H1K1	1	0.742067456245
Q02156	P12814	0	0.297810018063
Q9NYV4	P31146	0	0.0
Q04759	Q86UL8	0	0.0
P06493	Q9UHD8	0	0.0
Q16539	P17661	1	0.737092971802
Q04759	Q8WXH0	0	0.0
P19784	Q9UD71	1	0.724118173122
P42345	Q14289	0	0.265748172998
P06241	P14923	1	0.754493772984
Q9UHD2	O14920	1	0.7220568060870001
Q9NYV4	P25054	1	0.606978952885
Q9HC98	P14859	1	0.6802529096600001
Q04759	P63244	0	0.3836433887479999
Q92630	P10070	0	0.0
P19784	Q13526	1	0.659440159798
Q13188	P51955	1	0.7500655055050001
Q04759	P35372	1	0.754399418831
Q04759	P63244	0	0.3836433887479999
P78527	P61978	1	0.692992866039
P68400	P01116	0	0.0
P51617	Q9H4G4	0	0.0
P06493	P68400	1	0.755008816719
P17612	Q86V87	1	0.729449510574
Q9NWZ3	Q9NWZ3	1	0.745543003082
P27361	P63000	1	0.749599158764
Q04759	Q13191	1	0.768268823624
Q9BYP7	Q13621	1	0.62395375967
P49841	P39019	0	0.398130625486
Q9HC98	O00141	1	0.7305681705470001
Q96GD4	Q8IX03	1	0.7433709502220001
Q04759	P35241	1	0.745082974434
Q99640	P06493	1	0.733408033848
Q13188	Q7L9L4	1	0.773467898369
P28482	Q14686	1	0.741519093513
O14757	Q04837	0	0.0
Q13315	O75150	1	0.7409079074860001
P06493	Q9Y2I6	1	0.8315134048459999
O00418	P31146	0	0.0
P19784	Q8WXH0	0	0.0
P41743	Q12846	0	0.0
Q9Y243	O60674	0	0.295883953571
Q13131	P62258	1	0.599977254868
P27448	P30307	1	0.738005280495
P68400	Q15672	1	0.761988520622
P28482	Q96RK0	1	0.788051247597
Q9BYP7	P18206	0	0.0
Q9BUB5	P09651	1	0.765272200108
P19784	Q13526	1	0.659440159798
P07949	Q8N4X5	1	0.761988222599
Q15831	Q8TDC3	1	0.741037607193
P45985	P61764	0	0.0
O14757	O43294	0	0.225371286273
Q92630	P28482	1	0.59206455946
Q13188	Q13418	1	0.54307281971
P47710	Q9Y4G8	0	0.0
P19784	O00161	0	0.0
Q96GD4	Q6NZI2	1	0.737256407738
Q9BUB5	P0DMV8	1	0.556468009949
Q9UQM7	P35367	1	0.7541370391850001
P24941	Q8N3F8	1	0.842835962772
P19784	P55957	0	0.38791128993
P19784	P17096	0	0.499491542578
P24941	P10721	0	0.438783943653
P22694	O43707	0	0.0
Q04759	P63244	0	0.3836433887479999
P68400	P21673	1	0.7399905323980001
Q13188	P18206	0	0.0
Q8TDX7	P31645	0	0.0
Q13131	P62258	1	0.599977254868
Q9HC98	P50613	1	0.6667046546940001
Q13188	Q9H4B6	1	0.8487049937250001
P19784	Q13526	1	0.659440159798
Q9H4A3	Q8N9I0	0	0.0
O43683	O43684	1	0.769715070724
Q13315	P19022	0	0.320470780134
P06493	Q9Y2J4	1	0.6861988902089999
Q92630	Q14195	1	0.7674558162690001
P17252	P38936	1	0.766952931881
Q15418	P11831	1	0.70255869627
P43405	Q9GZY6	1	0.812377750874
Q13188	P06396	0	0.295967698097
Q00535	Q9UM54	0	0.0
P28482	P14672	1	0.566860020161
O14757	P25054	1	0.6504335999490001
Q9HBH9	P13861	0	0.0
Q13535	P07947	0	0.236682340503
Q8N4C8	Q8IY63	0	0.0
Q9NQU5	P46109	1	0.516147017479
P19784	P61978	1	0.669564723969
Q99558	P61160	1	0.783854722977
Q04759	P63244	0	0.3836433887479999
P17252	P41743	0	0.0
Q9NYV4	O00560	0	0.4816414117809999
P22694	P22694	0	0.0
Q00535	P51809	0	0.314220845699
P28482	Q13563	1	0.7272777557369999
P17252	P62258	1	0.592424511909
P12931	P17600	0	0.0
Q05655	Q9Y698	0	0.0
Q13188	Q7L9L4	1	0.773467898369
Q13535	P40692	1	0.729500770569
P19784	Q13526	1	0.659440159798
P24941	P51649	1	0.7375558018680001
P19784	Q86UL8	0	0.0
Q9BUB5	P62280	0	0.3632457256319999
P06493	P23396	1	0.76531881094
P24941	P33151	0	0.294710576534
Q92630	P31645	1	0.680454552174
O75582	P04083	1	0.7299460172650001
P19784	P11021	0	0.0
Q04759	P63244	0	0.3836433887479999
P28482	P17535	1	0.666270792484
P04626	P04626	1	0.755875587463
P45984	Q14653	1	0.7333648204800001
P43403	O43561	0	0.0
P11802	O15294	1	0.789466440678
Q9BUB5	P04792	1	0.727854847908
Q04759	P28482	1	0.661473631859
P24941	Q14195	1	0.7717548012729999
P17252	P29350	1	0.7381700277330001
P17252	P11233	1	0.648058533669
P24941	P10244	0	0.3723139464859999
P78527	P61978	1	0.692992866039
Q05655	O14939	1	0.786113083363
Q04759	P63244	0	0.3836433887479999
P45983	Q96SB3	0	0.0
Q04759	Q15052	1	0.7480303049089999
P19784	Q13526	1	0.659440159798
P17252	Q14994	1	0.742265343666
Q13188	P51955	1	0.7500655055050001
P17612	Q92597	1	0.7603092789650001
P17612	P16615	0	0.0
P17252	P04049	1	0.741330802441
Q13555	P35270	1	0.654779613018
P19784	P21980	1	0.761575758457
P48730	P35372	1	0.7241549491879999
Q96KB5	P61978	1	0.610357105732
Q14680	Q13485	1	0.71242159605
Q7L7X3	Q9P0L2	0	0.0
P24941	P24928	1	0.784163594246
Q9Y6K9	Q13418	0	0.0
Q04759	Q5JVS0	1	0.74765765667
P06241	P12931	1	0.719506919384
Q15418	Q15831	1	0.7256048917769999
Q04759	P63244	0	0.3836433887479999
Q99558	P61160	1	0.783854722977
O00418	O00418	1	0.759127795696
P19784	P61978	1	0.669564723969
Q86Z02	P04083	0	0.443008363247
Q9Y3S1	Q9UEW8	1	0.747551202774
Q9Y5P4	Q01955	0	0.0
P78527	P61978	1	0.692992866039
Q14164	Q12959	1	0.636884391308
Q96GD4	P05204	1	0.8045791983600001
P07948	P00519	1	0.7336224317550001
Q15418	P50552	1	0.745398700237
P28482	P61978	1	0.8140903115270001
P68400	P01116	0	0.0
O14757	P36507	1	0.734785735607
P19784	Q13526	1	0.659440159798
P17252	Q02241	1	0.60241818428
P19784	Q13526	1	0.659440159798
P21127	O00303	1	0.731537640095
P06493	O60331	1	0.8339160084720001
P06241	P20963	1	0.720943808556
Q15418	Q8N122	1	0.7419987320899999
Q04759	P15407	1	0.7395374178890001
P17612	Q13177	1	0.719536185265
P19784	Q02750	1	0.719970703125
P31749	P29401	1	0.73703032732
Q99558	O15111	1	0.734782516956
P00519	P22681	1	0.682264685631
P17252	O75469	1	0.745787262917
Q9BUB5	P13498	1	0.529545009136
P12931	P06396	1	0.748670399189
Q15139	Q12959	1	0.7001704573630001
P24941	Q86U86	1	0.739978849888
P68400	P07947	0	0.318461924791
P51812	Q14118	0	0.0
P06239	P15311	1	0.790834128857
Q04759	Q86UL8	0	0.0
O75914	Q03135	0	0.0
P19784	Q92769	0	0.499935805798
Q8IV63	O75531	1	0.749307215214
P19784	Q13526	1	0.659440159798
P31749	Q9H4X1	0	0.372654229403
P17252	Q13393	1	0.722820281982
P17612	Q13972	1	0.791574656963
Q13188	P62258	0	0.340849071741
Q2M2I8	P51809	1	0.536123812199
P31749	Q9Y698	0	0.0
P49137	P49815	1	0.8046075105670001
Q13188	Q7L9L4	1	0.773467898369
Q13188	Q9H492	0	0.478597819805
P43405	Q8WXH0	0	0.0
Q13188	P00523	0	0.0
P24723	Q9BZL6	1	0.771389901638
P17612	P23409	0	0.0
Q9NYV4	P24928	1	0.758612155914
P19784	Q13526	1	0.659440159798
P19784	Q13526	1	0.659440159798
Q04759	P15407	1	0.7395374178890001
P22612	Q8WXH0	0	0.0
O75914	Q16659	0	0.0
Q9BUB5	P04792	1	0.727854847908
P06493	Q01196	1	0.7838611006739999
P47710	Q04206	0	0.0
P27361	P09497	0	0.464527875185
Q13188	Q9H4B6	1	0.8487049937250001
P25098	P15311	1	0.7528668045999999
Q9HBH9	P23246	1	0.7279013991359999
P19784	Q13526	1	0.659440159798
P19784	P07910	1	0.687013030052
O75914	O75914	0	0.0
Q8TAI7	P04083	0	0.0
Q92630	P13807	1	0.7798467278479999
P27448	Q8WUI4	1	0.714047074318
P28482	Q9BZI1	0	0.0
P19784	Q13526	1	0.659440159798
P19784	Q13526	1	0.659440159798
O14757	P61587	1	0.6923009157179999
P53350	O96017	1	0.786432921886
Q92630	Q9Y2V2	1	0.768495619297
Q02156	P08631	0	0.261413037777
P50613	P03372	1	0.7978177070620001
P19784	P61978	1	0.669564723969
Q13535	O75717	0	0.0
P19784	P28482	1	0.674417436123
Q9BUB5	O14974	1	0.6905462145810001
P17612	P39019	1	0.733937263489
P06493	Q14790	1	0.8114966750139999
P24941	P57740	1	0.7674641013150001
P25098	P35241	1	0.728291869164
P19784	O75955	0	0.292499989271
P06493	P23396	1	0.76531881094
P19784	P52655	0	0.0
Q13188	P04040	0	0.416140466928
P24941	Q8IXM2	1	0.8498880863189999
Q9HC98	O43707	0	0.0
Q8N5S9	Q02750	1	0.7086677551270001
P19784	P17096	0	0.499491542578
P19784	Q13526	1	0.659440159798
Q16539	Q8IW41	1	0.730236709118
Q9P286	P05023	1	0.531385660172
P19784	Q8WXH0	0	0.0
Q13131	Q04759	1	0.510647952557
O75914	Q14118	0	0.0
Q99558	O00560	0	0.274346500635
Q9HC98	P52948	1	0.682550430298
P17612	Q6PIY7	0	0.0
P68400	O75822	1	0.758964180946
Q16539	P41743	0	0.0
Q9BYP7	Q13621	1	0.62395375967
Q04759	P63244	0	0.3836433887479999
P08922	Q86UL8	0	0.0
Q92630	P17655	1	0.7269036173819999
Q04759	O15111	1	0.656290233135
P17612	P39019	1	0.733937263489
P19784	P60484	1	0.715018153191
Q6IQ55	P17655	0	0.334559738636
P27448	P41236	1	0.748961687088
P24941	Q14161	1	0.702578485012
P42345	P27824	0	0.4773825407029999
O14757	Q14847	1	0.587828814983
P31749	P38936	1	0.785850703716
P28482	P08238	1	0.50659006834
Q9NYV4	P63104	1	0.513164997101
P22694	P06396	0	0.326040059328
P17252	Q8N0W4	1	0.7416648268699999
P28482	O75582	1	0.746797561646
P53350	Q9BVS4	1	0.7353397607800001
P19784	Q14005	1	0.66371768713
P23443	Q8TB45	1	0.754693210125
Q04759	O14974	1	0.728365182877
P17612	P39019	1	0.733937263489
Q96GD4	P26038	1	0.696784734726
P17252	P29350	1	0.7381700277330001
Q13315	Q8TAQ2	1	0.7606767416
Q05655	Q14896	1	0.797321081161
O14757	Q9GZR7	1	0.7401791810989999
P24941	O15511	1	0.588842332363
P42345	Q9Y2J4	1	0.739599704742
Q15418	Q16821	1	0.8496122360230001
Q00535	Q96RR4	1	0.503589510918
O14757	P46013	1	0.731667041779
P19784	P17655	1	0.690097808838
Q15349	P25963	1	0.5156034827229999
Q99558	Q9BR76	1	0.618289470673
Q13177	P62805	0	0.0
Q8IVT5	P04049	1	0.729870796204
Q9P1W9	P41279	1	0.595925450325
P19784	Q96SB4	1	0.7709687352179999
Q96RR4	O00161	0	0.0
P06241	Q96LC7	1	0.7574155330660001
Q13131	P11233	1	0.608635187149
Q8TD19	Q6UVK1	0	0.0
Q96S44	P62745	0	0.479083806276
Q15300	O00560	0	0.0
Q92630	O75449	1	0.753721475601
Q9BYP7	P55011	1	0.673139750957
Q8TD19	P62745	1	0.640744566917
O00418	O00418	1	0.759127795696
P28482	P17252	0	0.418525844812
O95382	P45983	1	0.766003251076
P45984	P13861	0	0.0
Q13315	Q92945	1	0.777594745159
P22694	Q14896	1	0.579203128815
Q92630	Q14195	1	0.7674558162690001
Q13976	Q15052	1	0.742426455021
P19784	P18887	1	0.752609491348
P24941	Q92542	0	0.268515884876
Q9P286	P15976	1	0.7576269507410001
Q96BR1	P35372	1	0.701133906841
P27361	Q96FF9	1	0.785968601704
Q9HC98	P23443	1	0.725252568722
P68400	Q96FW1	1	0.756509065628
P28482	P24941	1	0.766211688519
Q92630	Q13541	1	0.7705469131470001
P12931	O00560	1	0.764709293842
P27361	Q01860	1	0.753660678864
Q92630	P61978	1	0.757400155067
Q13188	Q14118	0	0.0
P51617	P0DMV8	1	0.5571373105049999
P31749	P29475	0	0.0
P23443	Q9Y4G8	1	0.806849241257
P19784	Q01892	0	0.0
P78527	P42575	1	0.737957537174
P19784	P06748	1	0.724540114403
P48729	Q9H6E5	1	0.761591553688
Q00535	Q16643	1	0.834981381893
P19784	Q13526	1	0.659440159798
Q04759	P63244	0	0.3836433887479999
Q8N5S9	P51636	0	0.3203047811989999
Q9BUB5	O00560	0	0.4929725229739999
P00519	Q00987	1	0.745526432991
P31749	Q9P0V3	0	0.0
P43250	P04040	1	0.671030342579
Q9NYV4	Q9NYV4	1	0.54905962944
P34947	P17655	1	0.710838973522
Q15418	P03372	1	0.8128745555879999
Q13315	P12830	1	0.636224269867
P19784	P11836	0	0.0
Q92630	Q14195	1	0.7674558162690001
Q96BR1	P49840	1	0.7494754195209999
P19784	P15529	0	0.0
Q9HC98	O60716	1	0.660224556923
P19784	P61978	1	0.669564723969
P00519	P15311	1	0.8372863531110001
P17612	P35240	1	0.848272800446
P17612	Q96CW1	0	0.248784810305
P68400	Q9H2G2	0	0.0
P68400	Q07954	1	0.6606037616730001
P06493	P62136	1	0.782542347908
P17252	P01116	0	0.0
P17612	Q96NW7	0	0.0
P19784	Q13526	1	0.659440159798
Q9Y243	Q9UKV8	1	0.7651908993719999
Q9NYV4	Q9NYV4	1	0.54905962944
Q04759	O43516	1	0.7675628066060001
P68400	P01116	0	0.0
P53350	Q9Y2T1	1	0.7255338430399999
P48730	P35372	1	0.7241549491879999
P22694	P30518	0	0.442875236273
Q16566	P23396	1	0.6454916596410001
Q9HC98	Q14118	0	0.0
P06239	P27986	1	0.629762887955
O00418	Q9Y4G8	1	0.50703728199
Q04759	P11021	0	0.0
P19784	P84090	0	0.0
Q9NYV4	P31749	0	0.379058301449
P19784	Q13526	1	0.659440159798
P12931	P42224	1	0.737287044525
P49841	Q15208	1	0.739616930485
P17252	P15382	0	0.0
P19784	Q13526	1	0.659440159798
O14757	Q9UJM3	1	0.746402144432
P68400	P49427	1	0.733812630177
P19784	Q13526	1	0.659440159798
P51955	Q14118	0	0.0
Q96GD4	Q03135	0	0.321042209864
Q99640	P06493	1	0.733408033848
Q13315	P00749	0	0.0
P68400	Q92542	1	0.658125936985
P68400	P11387	1	0.762962520123
O14757	Q9Y3Y2	0	0.0
Q9H4B4	P30304	1	0.7679523825650001
Q13418	P04083	1	0.7331138253210001
P35626	P30874	1	0.816161632538
P06241	Q9UQB3	0	0.0
P07949	Q8TEW0	1	0.67360830307
O14757	P23458	0	0.221610963345
P06241	P31994	1	0.751260042191
P19784	P32121	1	0.6980739235879999
P17612	P48729	1	0.778665006161
Q13153	Q13233	1	0.742631793022
Q38SD2	P06396	0	0.487584590912
P27361	P27824	1	0.743073225021
P19784	Q13526	1	0.659440159798
Q8TDX7	P27348	0	0.0
P19784	Q13526	1	0.659440159798
Q96GD4	P35659	1	0.763101756573
Q9BWU1	O00303	1	0.761020243168
P48730	O14641	1	0.735870063305
Q99558	P11717	0	0.452841699123
Q13976	P31146	0	0.0
Q00535	P36507	1	0.682157218456
P19784	Q8WXH0	0	0.0
P17252	Q06124	1	0.7634335756300001
P17252	P07737	1	0.5671680569650001
Q9UQM7	P61978	1	0.6963411569600001
O14757	Q7Z2Z1	1	0.76705801487
P42680	P16885	1	0.805358290672
Q04759	P17655	1	0.658313572407
P19784	P11021	0	0.0
O00141	P46527	1	0.796919345856
Q9UKI8	Q99638	1	0.7920953035349999
O96017	Q15717	1	0.7527821064
P19784	P67870	1	0.736669063568
Q04759	P15311	1	0.736951708794
Q9NQU5	Q9BY11	1	0.8081841468809999
P19784	P17931	1	0.540869355202
Q9NYV4	Q9NYV4	1	0.54905962944
Q96RR4	Q16566	1	0.739187896252
O43683	P62834	1	0.562612891197
Q96GD4	Q9UKV0	1	0.715425312519
P22694	P08138	1	0.745365560055
P28482	Q13485	1	0.7465232014659999
Q04759	P63244	0	0.3836433887479999
Q6P5Z2	P30622	1	0.7623037695880001
Q99640	Q86UL8	0	0.0
Q13976	Q8WZ42	1	0.75699031353
Q04759	Q9BXL7	1	0.759741425514
Q92630	Q02750	1	0.7535161376
Q04759	Q5JVS0	1	0.74765765667
Q15569	Q9Y281	0	0.0
Q04759	Q9BXL7	1	0.759741425514
P19784	Q01892	0	0.0
P19784	Q86UL8	0	0.0
P41240	P06396	1	0.698292434216
P19784	P00749	1	0.562164306641
P22612	P61978	0	0.0
A9UF07	P46109	0	0.0
Q96KB5	P68431	0	0.0
P19784	P61978	1	0.669564723969
Q04759	P63244	0	0.3836433887479999
Q92630	Q92630	1	0.648550868034
Q16816	P10636	0	0.0
Q96L34	P05023	0	0.0
P19784	P09497	0	0.496954739094
Q9UQM7	Q13177	1	0.54452753067
Q9H2X6	P11717	0	0.450032919645
P00533	Q9P0J1	1	0.752508401871
Q16584	Q16584	1	0.765921652317
P19784	Q13526	1	0.659440159798
P28482	Q9P2Y5	0	0.4492690563199999
P19784	Q13526	1	0.659440159798
Q00535	P06729	0	0.0
P12931	P14923	1	0.8031457662579999
Q04759	P10588	1	0.74676322937
O00418	O00418	1	0.759127795696
Q99558	P25963	1	0.760291934013
P54764	Q00535	0	0.451676547527
P19784	P28482	1	0.674417436123
Q6IQ55	P00749	0	0.453231215477
Q6P2M8	O43432	1	0.7331269383429999
P19784	P13349	1	0.53846758604
P43405	P05106	1	0.740438342094
P19784	P17655	1	0.690097808838
P11802	P07355	1	0.6090137362479999
P19784	Q13526	1	0.659440159798
P19784	P06748	1	0.724540114403
Q6IQ55	Q7L0J3	1	0.780735194683
Q04759	P35236	1	0.749879956245
Q13464	O60237	1	0.7658345699310001
P68400	O75955	0	0.225752234459
P68400	P01116	0	0.0
Q04759	Q12959	1	0.6531541347500001
Q13188	O60716	1	0.513422608376
P19784	P52655	0	0.0
Q13188	P38646	1	0.667605876923
P53350	Q96SB3	0	0.0
O75914	P17600	0	0.0
Q96L34	Q96L34	0	0.0
Q9UQ88	O95238	1	0.7794711589810001
Q8N5S9	Q16625	1	0.599938392639
Q9UQ88	P21127	1	0.7295650839810001
Q9NWZ3	Q03135	0	0.359644949436
Q9BZL6	Q15366	0	0.0
P19784	Q13526	1	0.659440159798
Q9NYV4	P24928	1	0.758612155914
P12931	O00560	1	0.764709293842
Q13131	P46940	1	0.5811209082600001
Q8N5S9	Q8IU85	1	0.760897755623
P31749	P10275	1	0.7359433770180001
Q99558	P62280	0	0.424113810062
P19784	P61978	1	0.669564723969
Q04759	P63244	0	0.3836433887479999
Q92630	P10636	1	0.508383989334
Q96GD4	P31431	0	0.316047042608
P41743	Q6P1M3	0	0.0
Q05655	P08473	1	0.506064295769
P17252	P10301	0	0.4801736176009999
Q8IW41	O15143	1	0.636043071747
P27361	P14923	0	0.313663899899
P24941	O95295	1	0.753121733665
P17612	P63252	1	0.778839111328
Q9NYV4	P24928	1	0.758612155914
Q05655	Q05655	1	0.752466022968
Q13188	P17252	1	0.7328267693520001
P17612	P27815	1	0.736900687218
P06241	Q16625	1	0.675357818604
P19784	Q12959	1	0.607668220997
P19784	P61978	1	0.669564723969
P68400	Q92974	1	0.6959679126739999
Q9UQ88	P27361	1	0.708294093609
P68400	Q14493	1	0.7531856894490001
P17612	P33076	1	0.747702777386
P07948	Q13291	1	0.764350652695
P19784	P55957	0	0.38791128993
Q96RR4	P17655	1	0.634864509106
Q04759	P28482	1	0.661473631859
P19784	Q13526	1	0.659440159798
O15530	Q15349	1	0.672059953213
Q13535	P54132	1	0.735530376434
P27448	P28482	0	0.4673714339729999
P67775	O43524	0	0.0
Q9UEW8	P13861	0	0.0
Q8N5S9	P28482	1	0.504345297813
P68400	P14317	1	0.746067941189
P17612	P06400	1	0.738114655018
Q9UL54	Q9UL54	0	0.0
Q04759	P04083	1	0.7293868660930001
P17612	P36955	1	0.747194766998
Q15118	P23443	0	0.0
P22612	P29474	0	0.0
P19784	O00161	0	0.0
Q8TD19	P0DMV8	1	0.655562579632
Q04759	Q02750	1	0.6718745827670001
P19784	P41236	1	0.6833953857420001
Q9Y243	Q13188	0	0.480518847704
P24941	P17096	1	0.7399545311929999
Q9NYV4	Q9NYV4	1	0.54905962944
P19784	Q6FHW4	0	0.0
P19784	P17931	1	0.540869355202
P78527	Q14344	0	0.360359489918
P28482	Q6NZI2	0	0.428719907999
P42684	P0DMV8	0	0.2055266052479999
Q04759	Q9UEW8	1	0.7398825883869999
Q8N5S9	Q13131	1	0.74732530117
Q06187	Q6UVK1	0	0.0
P19784	O00161	0	0.0
P19784	P04792	1	0.6728708148
Q8N5S9	Q8TDC3	1	0.6949317455290001
O14757	Q13257	1	0.774549543858
O75582	Q15831	1	0.614831030369
P19784	Q13526	1	0.659440159798
P28482	P07900	1	0.646184384823
P45985	P19793	1	0.7870151996610001
Q9BUB5	P04792	1	0.727854847908
Q15300	Q15300	0	0.0
Q05513	P11717	1	0.6523972749710001
Q13464	P62834	1	0.7009381055830001
Q04759	P35236	1	0.749879956245
P10644	Q12959	0	0.0
P42336	P62258	0	0.397607713938
P53350	Q9BR76	1	0.652319550514
Q04759	P63244	0	0.3836433887479999
Q13131	O43524	1	0.762586653233
Q16816	P62258	0	0.0
P31749	P35222	1	0.727450013161
Q9BUB5	P04792	1	0.727854847908
Q9BUB5	P06730	1	0.761999249458
P51812	Q2M1Z3	0	0.0
P12931	O15056	1	0.751978635788
Q9HC98	Q13418	1	0.512379407883
O15111	O15511	1	0.655891180038
P43405	P51636	1	0.691317558289
Q13464	P04637	1	0.809017896652
P24941	Q99439	0	0.28131917119
P31749	Q13043	1	0.744064867496
Q04759	P11912	0	0.0
P19784	Q13526	1	0.659440159798
P19784	Q02750	1	0.719970703125
O00418	P13639	1	0.558184087276
P17612	P17655	1	0.738649785519
Q9BYP7	Q9UK17	0	0.391144365072
Q15831	Q14155	1	0.7161245346070001
O14757	P32004	1	0.726589381695
P19784	P04198	1	0.632451713085
Q16816	O00560	0	0.0
Q99558	O14920	1	0.752337217331
Q04759	P50570	0	0.447896063328
P42684	O00560	1	0.662649333477
Q92630	Q02750	1	0.7535161376
P68400	O75955	0	0.225752234459
P19784	Q13526	1	0.659440159798
P06493	O75122	1	0.8555880784990001
P19784	Q13526	1	0.659440159798
P49841	Q8WX93	1	0.8514755964280001
Q05655	P53004	1	0.77680426836
P19784	P13349	1	0.53846758604
Q13177	P01236	0	0.0
Q9NYV4	P24928	1	0.758612155914
O75914	Q9Y4G8	0	0.0
P07949	P31749	1	0.710299968719
Q16816	P10636	0	0.0
Q13188	P0DMV8	1	0.634132564068
P07948	P13569	1	0.576998770237
P19784	P06748	1	0.724540114403
P24941	O15511	1	0.588842332363
Q16539	P52945	1	0.761308848858
P19784	O14958	1	0.76996833086
P17612	Q14254	0	0.230358526111
Q8N5S9	P28482	1	0.504345297813
P12931	P46940	0	0.455083608627
P19784	Q13526	1	0.659440159798
Q9P286	P31146	0	0.0
P28482	Q9P2Y5	0	0.4492690563199999
P19784	O00161	0	0.0
P19784	P17655	1	0.690097808838
Q92630	P04083	1	0.6904837489129999
P17252	P62834	1	0.6349069476129999
P28482	P49841	1	0.751750469208
Q15418	P13498	1	0.7221201658249999
P19784	P35372	1	0.735808432102
Q9BUB5	Q8TEW0	1	0.780878543854
P53779	P04637	1	0.73167103529
P10644	P04439	0	0.0
O00418	P27361	1	0.633407592773
Q9HC98	P06396	0	0.418479532003
Q96RR4	P11021	0	0.0
Q16816	P10636	0	0.0
P17252	Q14676	1	0.6127434372899999
Q99558	Q14118	0	0.0
P19784	Q9Y5B0	1	0.699049592018
P45983	P08047	1	0.805828034878
Q15759	Q8TDY4	0	0.345991849899
P19784	Q12972	0	0.252782464027
P19784	Q13526	1	0.659440159798
P19784	Q13526	1	0.659440159798
P53779	Q6UVK1	0	0.0
P06241	P12318	1	0.747379720211
P22694	P04040	1	0.5502295494080001
P24941	Q9P2B4	1	0.746659934521
P43405	P61073	0	0.450121194124
P05771	P48736	1	0.741494596004
Q92630	P31645	1	0.680454552174
P68400	O95819	0	0.0
Q8IW41	O00418	1	0.735981106758
Q8TD19	P62745	1	0.640744566917
Q9H4B4	P05412	1	0.8267898559569999
P11802	P07355	1	0.6090137362479999
Q13131	Q7Z3C6	1	0.74351978302
P06493	Q9BPX3	1	0.764105021954
P28482	P30041	1	0.7625022530560001
P28482	O00429	1	0.771680414677
P19784	Q13526	1	0.659440159798
Q04759	P63244	0	0.3836433887479999
Q96GD4	P63104	1	0.759037196636
P19784	P37840	1	0.687095463276
Q04759	P15407	1	0.7395374178890001
Q8TD19	Q9HC98	1	0.74308013916
Q7L7X3	P28482	0	0.0
P19784	P11021	0	0.0
Q9Y2U5	O14733	0	0.391243487597
P19784	Q8WXH0	0	0.0
Q04759	Q9UEW8	1	0.7398825883869999
Q9NYV4	Q9NYV4	1	0.54905962944
Q04759	P31645	1	0.703352689743
Q9Y3S1	Q9H4A3	1	0.773739695549
P17612	Q14254	0	0.230358526111
P22607	O14786	0	0.0
Q13882	Q99704	1	0.65322548151
Q6IQ55	Q15599	1	0.607425749302
Q92630	Q05513	0	0.3803971707819999
Q13188	P00523	0	0.0
O75914	Q02750	0	0.0
P31749	Q9UKV3	1	0.734947323799
Q04759	Q92542	1	0.7029144167899999
Q99558	O43707	0	0.0
Q16816	P04040	0	0.0
Q00535	P17600	0	0.0
O75582	Q12959	1	0.683162033558
Q15569	P23528	1	0.747591137886
P07948	Q13873	0	0.0
Q05655	P04637	1	0.7797224521639999
Q13153	O95863	1	0.762117862701
P06241	P51809	1	0.6972478628159999
P45984	P13861	0	0.0
Q92630	P43686	1	0.7957744002339999
Q8N5S9	Q16566	1	0.8075488805769999
P24941	P05556	0	0.478460788727
Q6IQ55	P28482	0	0.4490414559839999
Q13131	P05023	1	0.727553069592
Q9NYV4	P31146	0	0.0
Q92630	P04637	1	0.7710141539569999
P19784	Q12959	1	0.607668220997
P06493	O00429	1	0.777210950851
P36897	Q96FW1	1	0.738985955715
PR:000026196	Q15796	0	0.0
P19784	P04198	1	0.632451713085
P22612	P35372	0	0.0
P19784	Q13526	1	0.659440159798
O00418	P18206	0	0.0
P41279	Q13541	1	0.745928525925
Q92630	P10636	1	0.508383989334
Q13131	P12814	0	0.231525048614
P49841	Q92597	1	0.792064726353
P22612	Q14896	0	0.0
P41743	Q9UQB8	1	0.779581546783
P24941	P17676	1	0.759132504463
Q05513	Q8IX03	1	0.814543366432
Q13535	P38398	1	0.7299250364300001
P19784	Q13526	1	0.659440159798
P68400	P45973	1	0.594635128975
Q02156	Q14160	1	0.8090792894359999
Q8TD19	Q8TD19	1	0.814025461674
P28482	Q96SB3	0	0.0
Q9UHD2	Q16625	1	0.7828499674799999
P24941	P07947	0	0.318547993898
P06493	P31948	0	0.0
P19784	P52655	0	0.0
P31751	O60331	1	0.7564437985420001
P17252	P08034	0	0.0
P19784	P04083	1	0.729670703411
P28482	Q12778	1	0.7787171006199999
Q13464	P53671	1	0.734639048576
Q9UPZ9	Q8N122	1	0.736253917217
P19784	P17655	1	0.690097808838
Q13535	Q9BXW9	1	0.7487056851389999
P19784	O15511	1	0.65523314476
O00418	O00418	1	0.759127795696
Q96GD4	P60953	0	0.0
P07332	P11021	0	0.0
O14920	O00161	0	0.0
Q13177	P27824	1	0.500786244869
P27361	Q16625	1	0.683794975281
Q99558	O15111	1	0.734782516956
O75914	P06396	0	0.0
P17252	P62258	1	0.592424511909
Q13237	P32929	1	0.811931848526
P19784	P22681	0	0.291894108057
P19784	Q6FHW4	0	0.0
P19784	Q9Y5B0	1	0.699049592018
P49841	P30281	1	0.741143703461
P31749	P23396	1	0.772816598415
Q16539	P62834	0	0.281671971083
Q92630	P12931	1	0.674210369587
Q2M2I8	Q9BXS5	0	0.0
P19784	P11021	0	0.0
P19784	P28482	1	0.674417436123
Q92630	Q12959	1	0.659767329693
P06241	Q16625	1	0.675357818604
P19784	P60484	1	0.715018153191
Q6P5Z2	P00533	1	0.741239964962
Q13535	P35372	0	0.474466890097
O75914	P04049	0	0.0
Q04759	P63244	0	0.3836433887479999
Q13464	P17661	1	0.776627957821
Q13153	P54764	0	0.3541849851609999
Q9UM73	P14618	1	0.535566747189
P45984	P31947	1	0.750916242599
P22612	Q16625	0	0.0
Q04759	P31645	1	0.703352689743
P12931	Q4VCS5	0	0.422568380833
P28482	P08238	1	0.50659006834
P19784	Q13526	1	0.659440159798
P17252	P43629	1	0.7396814227099999
P11802	Q9BQA1	1	0.769793331623
P45983	P63104	1	0.7629411220550001
Q9UM73	Q06124	1	0.8094788193699999
P54646	P06241	0	0.476926892996
Q15831	P35372	1	0.740134656429
Q14164	O95786	1	0.754708647728
Q13188	P46937	1	0.764956116676
P31749	Q09470	1	0.684409856796
A0A173G4P4	P04040	0	0.0
P31749	O14640	0	0.0
Q96GD4	P17948	0	0.253141373396
Q15300	P40763	0	0.0
Q02156	Q99259	1	0.669444084167
P19784	P17096	0	0.499491542578
Q14680	Q99683	1	0.7047443985940001
Q9NYV4	O43707	0	0.0
P31152	P0DMV8	0	0.0
P12931	Q13444	1	0.716970860958
Q04759	P63244	0	0.3836433887479999
Q04759	O43516	1	0.7675628066060001
Q13315	P00749	0	0.0
P17252	Q9NQA5	1	0.7548240423199999
P53778	P26045	1	0.791639208794
P19784	Q13526	1	0.659440159798
P07947	P08172	1	0.566349387169
Q9HC98	O00141	1	0.7305681705470001
Q00535	Q15833	0	0.0
O14757	Q9UPP1	1	0.792182505131
P27361	O43521	1	0.794374346733
Q13627	P05023	0	0.425626158714
P51813	P08581	1	0.741559863091
Q13535	Q8WXH0	0	0.0
P19784	Q92598	0	0.0
Q8TD19	P46783	1	0.7015038132670001
P19784	Q13526	1	0.659440159798
P28482	P19438	1	0.5863653421399999
Q13153	Q96A00	1	0.627605736256
P19784	P55087	1	0.692131102085
P67870	P06748	0	0.0
Q13188	O00560	0	0.387517482042
O14730	Q9BYX4	0	0.0
Q8TD19	Q8TD19	1	0.814025461674
Q13557	P26678	1	0.650454998016
Q13315	P00749	0	0.0
P19784	Q13526	1	0.659440159798
P54764	P19174	1	0.622508585453
Q9Y243	P22681	0	0.45333814621
P19784	P04083	1	0.729670703411
P28482	Q9C0C2	1	0.8015582561489999
P31749	Q14643	1	0.5443974137309999
P19784	P41236	1	0.6833953857420001
Q5S007	P04637	1	0.73745149374
P24941	Q96RK0	1	0.780727744102
Q9NQU5	P10275	1	0.7431411147120001
Q9BWU1	Q13153	1	0.7348338961599999
P28482	P08238	1	0.50659006834
Q14164	Q96FA3	1	0.792349874973
Q04759	Q02750	1	0.6718745827670001
P28482	P33981	1	0.745315730572
Q9UM73	P04083	1	0.59636259079
Q92630	O43602	0	0.0
P00519	Q9Y624	0	0.3181503415109999
Q14680	P84022	1	0.618777692318
Q9BUB5	P04040	0	0.388025224209
P57059	Q53ET0	0	0.359500259161
Q04759	Q04759	1	0.732175767422
Q13131	P07355	1	0.802242875099
P19784	Q01892	0	0.0
P19784	Q02750	1	0.719970703125
P19784	P11021	0	0.0
P06493	P29590	1	0.7830176949500001
Q7KZI7	Q8WUI4	1	0.736018538475
P17252	P61764	0	0.0
Q05655	P17655	1	0.7518576979639999
Q15139	Q99683	1	0.725067555904
P24941	P62841	0	0.39882850647
P00519	Q15746	1	0.776628851891
P12931	Q08209	0	0.0
Q15208	Q96RD6	0	0.0
Q9UL54	P11021	0	0.0
P19784	P18887	1	0.752609491348
P27361	P14923	0	0.313663899899
P68400	P01116	0	0.0
Q92630	P10070	0	0.0
Q13535	P35372	0	0.474466890097
Q04759	P63244	0	0.3836433887479999
P17612	P16615	0	0.0
Q99558	O14920	1	0.752337217331
P24941	Q8IXM2	1	0.8498880863189999
P19784	Q13526	1	0.659440159798
Q9NYV4	Q03135	0	0.476204544306
P07947	Q05655	1	0.672872126102
Q13315	Q5TZA2	0	0.0
P17612	Q96NW7	0	0.0
O14920	P25963	1	0.75042706728
Q9HC98	Q05586	1	0.7694166898729999
P30530	P30530	0	0.0
P48729	Q13418	0	0.314896255732
P19784	Q16543	1	0.7490452528
O96013	P55072	0	0.451415210962
O75582	Q92934	1	0.7487226128579999
O14920	Q96CV9	1	0.7448618412019999
P23443	Q92934	1	0.7907937169079999
P78527	P55895	1	0.736081361771
Q16816	P10636	0	0.0
P50613	Q00534	1	0.724318504333
P19784	Q12972	0	0.252782464027
P17252	P32004	1	0.7346379160879999
P48729	Q00535	1	0.7324339151379999
Q96S44	P04637	1	0.7290953993800001
Q02156	P35241	1	0.709208011627
O14757	Q2M1Z3	0	0.0
Q9BYP7	P18206	0	0.0
P19784	Q9UD71	1	0.724118173122
P22612	Q14896	0	0.0
P19784	P61978	1	0.669564723969
Q9HC98	P18206	0	0.0
Q9HC98	Q13418	1	0.512379407883
P24941	P12268	1	0.733390152454
Q99558	P05023	0	0.437595963478
P19784	P17655	1	0.690097808838
O00418	P62258	1	0.636596977711
P31751	P29474	1	0.712974965572
Q9UQM7	Q06210	1	0.767798542976
P28482	Q9UK17	0	0.353865623474
Q04759	O15530	1	0.597700715065
P19784	Q05513	1	0.5163393020629999
P06493	P39019	0	0.435942739248
Q15569	P13498	1	0.512261629105
P48729	Q13148	1	0.7492510080339999
P68400	P62917	1	0.563266694546
Q6P5Z2	P28482	1	0.5705928206440001
P51812	P13796	1	0.745517849922
P49841	O60341	1	0.7661475539210001
Q13188	Q9H4B6	1	0.8487049937250001
O96017	Q14344	0	0.477035164833
P24941	Q9UHR4	0	0.0
Q6IQ55	O00139	1	0.740319311619
Q15418	P26038	1	0.690424084663
P19784	Q13526	1	0.659440159798
Q05513	P35579	1	0.696781337261
Q96GD4	P45973	1	0.734464228153
P31751	P00749	1	0.695751011372
P17252	Q9UJY1	1	0.654651522636
Q92630	P05412	1	0.78714621067
Q15759	O60381	0	0.452910155058
P19784	Q02750	1	0.719970703125
Q13464	P05023	1	0.65914607048
P68400	O75955	0	0.225752234459
P19784	P28482	1	0.674417436123
P28482	Q9NRA0	1	0.82483369112
Q16816	P27361	0	0.0
P42345	Q00613	1	0.740973830223
Q15569	P31146	0	0.0
P27361	Q15599	0	0.450329005718
P54764	Q9UJU6	1	0.6420347690579999
P28482	Q92934	1	0.771044492722
P19784	P17655	1	0.690097808838
P41743	P19022	0	0.245615839958
P19784	Q01892	0	0.0
P17612	P39019	1	0.733937263489
Q7L7X3	P46734	0	0.0
Q99558	Q00653	1	0.780702114105
P28482	Q9H3Z4	0	0.489689707756
Q9NQU5	Q9NQU5	1	0.728733181953
P22612	Q14896	0	0.0
Q9NQU5	Q00987	1	0.739808142185
Q04759	O15111	1	0.656290233135
P19784	Q712K3	1	0.525263130665
P19784	P61978	1	0.669564723969
Q96RR4	P17655	1	0.634864509106
P12931	Q00987	1	0.7419185638429999
P17612	Q05469	1	0.78974634409
Q9HC98	Q03135	0	0.372435569763
O00418	O00418	1	0.759127795696
P19784	P28482	1	0.674417436123
Q9UQ88	P0DMV8	1	0.51096367836
P17252	P02686	0	0.284404009581
Q04759	P04083	1	0.7293868660930001
P24941	P15172	0	0.0
Q9HC98	O00141	1	0.7305681705470001
O14757	O15350	1	0.746189653873
P12931	P36544	1	0.75154286623
Q16539	P10636	0	0.434853613377
Q16539	Q14765	0	0.0
P49841	Q9UQB3	0	0.0
[truncated: 407 more rows]
