# Supplementary material for: A knowledge graph representation learning approach to predict novel kinase–substrate interactions
Source: Royal Society of Chemistry journal article supplement (doi:10.1039/d1mo00521a), 2022-08-17
Supplement: d1mo00521a2.csv [file d1mo00521a2.csv]

head	tail	label	score
P45983	Q08209	0	0.0
P19784	Q9Y5B0	0	0.0
P05129	P11388	0	0.0
P06493	P61073	1	0.561
P49841	P53396	0	0.0
Q13131	Q9UQK1	0	0.0
P06493	Q9Y2V2	1	0.55
P19784	Q03060	0	0.0
Q7L7X3	O60566	0	0.0
P53350	P31431	0	0.0
Q9BUB5	P47712	0	0.0
Q16539	P41743	0	0.0
P28482	Q05209	0	0.0
P19784	Q13526	0	0.0
P53355	P40429	0	0.0
P19784	O60674	0	0.0
Q683Z8	P04637	0	0.0
Q9H4B4	P11021	0	0.0
Q04759	Q02750	0	0.0
P19784	Q00613	0	0.0
Q8IW41	O43524	0	0.0
P06493	Q13586	1	0.563
P28482	Q13563	0	0.0
P31749	P54274	1	0.6940000000000001
P53350	P30260	0	0.0
P27361	P14923	0	0.0
P51812	P05114	0	0.0
P28482	Q13501	0	0.0
Q9BUB5	P13498	0	0.0
P48729	Q9Y4G8	1	0.6
Q8TD19	Q8TD19	0	0.0
P27361	Q9UHB6	0	0.0
P05771	P13498	0	0.0
O15530	Q16513	0	0.0
P22612	Q14896	0	0.0
Q04759	P15311	0	0.0
O14965	Q14203	0	0.0
P06493	O43521	1	0.57
P19784	Q99801	0	0.0
P49840	P22415	1	0.517
Q04759	P63244	0	0.0
Q8IWU2	P11216	0	0.0
P06493	P52732	1	0.5660000000000001
P19784	Q13526	0	0.0
P19784	Q13526	0	0.0
Q92630	P35372	0	0.0
P24941	P62841	0	0.0
Q04759	Q5JVS0	0	0.0
P22612	Q13185	0	0.0
Q9NYV4	P24928	0	0.0
O14757	P52292	0	0.0
Q9UBE8	P0DMV8	0	0.0
O00418	O00418	0	0.0
Q13976	Q76M96	1	0.626
Q13237	P17655	0	0.0
P06241	P16885	0	0.0
Q92630	P17655	0	0.0
P28482	P05198	0	0.0
P17252	P62834	1	0.762
P19784	P11836	0	0.0
P24941	P22674	0	0.0
P19784	Q8WXH0	0	0.0
P06493	P07947	1	0.5770000000000001
P17252	Q07869	1	0.911
Q92630	P17655	0	0.0
Q7L7X3	P11912	0	0.0
Q14004	P24928	0	0.0
Q05655	Q9Y698	0	0.0
Q8IWQ3	P10636	0	0.0
P06241	P61586	0	0.0
P12931	Q9UKW4	1	0.616
P19784	Q13526	0	0.0
P28482	P51170	0	0.0
P19784	Q13526	0	0.0
Q92630	O43255	0	0.0
Q15746	O14950	0	0.0
P22607	P22607	0	0.0
P42345	Q5T4S7	0	0.0
O75116	P35241	0	0.0
PR:000029189	O00560	0	0.0
P68400	Q9Y365	1	0.682
P23443	P30050	0	0.0
Q13188	Q9H8S9	0	0.0
O15530	Q15700	0	0.0
P51449	Q13541	0	0.0
P24723	Q06124	0	0.0
P78368	Q15555	0	0.0
Q04759	P63244	0	0.0
Q8IWU2	P17813	0	0.0
Q04759	O14920	0	0.0
Q13627	P55211	0	0.0
Q13315	Q9UQR1	1	0.621
Q9BYP7	Q9H4A3	0	0.0
Q13882	P31749	0	0.0
P17612	Q92597	1	0.691
Q04759	Q04759	0	0.0
P49840	P61586	1	0.501
Q04759	P63244	0	0.0
Q8TD19	Q9HC98	0	0.0
Q16584	P0DMV8	0	0.0
P45983	P30307	0	0.0
P17252	P29350	1	0.928
P27361	Q07954	0	0.0
Q8N5S9	P31749	0	0.0
P19784	P42768	0	0.0
P28482	P17480	0	0.0
P28482	P08238	0	0.0
P19784	P28482	0	0.0
Q96RR4	Q96RR4	0	0.0
Q13315	Q14191	1	0.682
Q04912	Q04912	0	0.0
P19784	P11836	0	0.0
P19784	Q13526	0	0.0
Q02156	Q16625	0	0.0
Q13188	P05023	0	0.0
P06241	P51911	0	0.0
O75582	Q16695	0	0.0
O00141	O00213	0	0.0
P17252	P17813	1	0.841
P19784	Q13526	0	0.0
P41279	Q15418	0	0.0
P51948	Q8WXH0	0	0.0
Q9Y2U5	Q16512	0	0.0
Q16539	Q05655	1	0.541
P06239	P06239	0	0.0
Q9NYL2	O96017	0	0.0
Q13131	P04626	0	0.0
Q6P2M8	P0DMV8	0	0.0
P07948	P12318	0	0.0
P19784	P18887	0	0.0
Q02156	P46940	0	0.0
P19784	Q13526	0	0.0
Q9NYV4	P24928	0	0.0
Q9BUB5	P45983	0	0.0
PR:000026196	P06396	0	0.0
P41240	P41240	0	0.0
O00418	Q9Y4G8	0	0.0
P19784	P10451	0	0.0
P49840	Q2M1Z3	0	0.0
O14730	Q9Y4G8	0	0.0
O14920	P17655	0	0.0
O14757	Q96N67	0	0.0
Q9UQM7	P51790	0	0.0
Q13131	Q9BU19	0	0.0
Q92630	O43255	0	0.0
P19784	P04818	0	0.0
Q9NYV4	P24928	0	0.0
P11309	O15143	0	0.0
P04626	P31146	0	0.0
Q86Z02	P17655	0	0.0
P12931	P78352	1	0.584
Q96RR4	P50570	0	0.0
P68400	P16949	1	0.605
P17612	P48730	0	0.0
P07332	P11274	0	0.0
Q8TD19	P26038	0	0.0
Q8IWQ3	P30101	0	0.0
P27361	Q08499	0	0.0
P17252	P29350	1	0.928
P17612	P55087	1	0.7140000000000001
Q04759	Q02750	0	0.0
P19784	Q13526	0	0.0
P17252	P07355	1	0.92
P06493	Q9Y6W5	1	0.593
Q13188	Q13188	0	0.0
Q96BR1	P06748	0	0.0
P45984	O43521	0	0.0
Q9UQM7	P31645	0	0.0
Q15418	Q14451	1	0.623
P17252	P22460	1	0.8690000000000001
Q14164	P15311	0	0.0
Q8N5S9	P61978	0	0.0
P12931	P23743	0	0.478
Q99640	P06493	0	0.0
P24941	Q9UEY8	0	0.0
Q16512	P36871	0	0.0
P31751	P51636	0	0.0
P05771	P26010	0	0.0
Q05513	P30086	0	0.0
P19784	P35222	0	0.0
P28482	P51168	0	0.0
Q92630	P61978	0	0.0
Q7L7X3	O60566	0	0.0
P19784	Q13526	0	0.0
Q04759	Q86UL8	0	0.0
P19784	Q13526	0	0.0
Q00535	Q02750	1	0.732
Q13188	P51955	0	0.0
Q05655	P40189	0	0.0
Q9HC98	P23443	0	0.0
P12931	O60496	0	0.0
P27361	O60331	0	0.0
Q13315	P00749	0	0.405
O15111	Q9BUZ4	0	0.0
P23443	P03372	0	0.0
P27361	O00429	0	0.0
P78368	Q86UL8	0	0.0
Q13976	P04792	1	0.589
Q04759	Q92934	0	0.0
P49841	P62491	0	0.0
P19784	Q99801	0	0.0
Q13976	P31146	0	0.0
P21127	P31146	0	0.0
P17612	O14493	1	0.57
Q15418	Q16875	1	0.6459999999999999
P07949	O60716	0	0.0
P27361	P14923	0	0.0
P17612	Q6J4K2	1	0.875
Q8N5S9	P17655	0	0.0
O15530	O00213	0	0.0
P49840	Q12846	0	0.0
Q92630	P61978	0	0.0
P48729	Q13144	1	0.556
P19784	Q13541	0	0.0
Q16539	P35638	1	0.667
Q13315	P78527	1	0.6409999999999999
Q92630	Q16555	0	0.0
Q99558	Q96N67	0	0.0
P06493	P39019	1	0.508
O00418	P05023	0	0.0
P27361	P05787	0	0.0
P68400	O75496	1	0.7290000000000001
P67870	O95863	0	0.0
P19784	Q92769	0	0.0
O00418	P11717	0	0.0
Q8TD19	Q8TD19	0	0.0
Q7L7X3	P27348	0	0.0
Q9UQM7	P12931	0	0.0
P22694	P26038	0	0.0
P68400	P01116	0	0.0
Q05513	P49841	0	0.0
P19784	P18031	0	0.0
Q15208	Q15208	0	0.0
Q99558	Q00653	0	0.0
Q9BYP7	P78352	0	0.0
O75914	P04049	0	0.0
P78368	Q9Y5P4	0	0.0
P42345	Q08209	0	0.0
P31751	P15311	0	0.0
O14920	Q5S007	0	0.0
P19784	Q12959	0	0.0
P28482	Q14157	0	0.0
O14757	Q15654	0	0.0
P05771	Q9BXL7	0	0.0
P41240	Q14118	0	0.0
O00418	P05023	0	0.0
Q6P5Z2	Q6P5Z2	0	0.0
P48729	P27361	0	0.434
Q04759	P63244	0	0.0
Q99558	P27361	0	0.0
Q13131	P52292	0	0.0
P19784	Q13144	0	0.0
P24941	P38432	0	0.0
P00533	Q14980	1	0.509
Q9UEW8	Q9UHW9	0	0.0
P19784	P18887	0	0.0
P49137	Q14847	0	0.0
P06493	Q96C19	1	0.506
Q9NYV4	P0DMV8	0	0.0
Q13535	Q00987	0	0.0
Q99640	P35372	0	0.0
P17612	Q9Y6E0	1	0.861
O00418	O00418	0	0.0
Q92630	P50570	0	0.0
O15530	P63000	0	0.0
P12931	P37840	1	0.512
P19784	Q13547	0	0.0
P17612	P29966	0	0.349
P19784	Q13526	0	0.0
O95835	Q9GZV5	0	0.0
P19784	P52655	0	0.0
Q13554	P19022	0	0.491
Q13188	P05023	0	0.0
Q14680	Q16625	0	0.0
P19784	P61978	0	0.0
P68400	P08833	1	0.685
Q04759	P63244	0	0.0
P19784	Q9UNN4	0	0.0
Q9BUB5	P06730	0	0.0
P19784	P61978	0	0.0
P22694	Q14896	0	0.0
P17612	Q9UJY1	1	0.743
P17612	P36956	1	0.745
P17252	P35611	1	0.929
O14920	Q9BXH1	0	0.0
Q8TD19	Q8TD19	0	0.0
Q15208	Q86UL8	0	0.0
P42345	O00418	0	0.0
P19784	Q13085	0	0.0
P31751	Q92974	0	0.0
Q9BWU1	O00303	0	0.0
O75914	Q9Y4G8	0	0.0
P19784	O43896	0	0.0
Q8TD19	Q8TDX7	0	0.0
P08637	P05023	0	0.0
P19784	P55087	0	0.0
P17612	P25098	1	0.787
Q13535	P35372	0	0.0
P19784	Q13526	0	0.0
P19784	P28482	0	0.0
Q9P286	P15976	0	0.0
Q6IQ55	Q7L0J3	0	0.0
P27361	P12931	0	0.0
P28482	Q86WV6	0	0.0
Q9NYV4	P24928	0	0.0
Q9BUB5	P45983	0	0.0
P07947	Q16543	0	0.0
P31749	O00213	1	0.7509999999999999
P19784	P35372	0	0.0
P17252	Q14676	1	0.897
P49841	Q14494	0	0.0
P31749	P39019	0	0.206
O75582	Q86UL8	0	0.0
Q38SD2	Q96SN8	0	0.0
P17612	P98082	1	0.56
Q92630	P01106	0	0.0
P06493	Q9Y624	1	0.52
Q92630	O43255	0	0.0
Q9NYV4	P31146	0	0.0
P45983	P31947	0	0.0
P31751	P13861	0	0.0
P06493	P23396	1	0.556
P19784	Q01105	0	0.0
P68400	P50895	1	0.601
Q00535	Q13153	1	0.68
Q8IYT8	A2RUS2	0	0.0
P51812	Q13418	0	0.0
P12931	Q14289	1	0.596
P05771	P63328	0	0.0
P17612	Q96PU5	1	0.8320000000000001
Q13188	Q13188	0	0.0
Q9BYP7	P55011	0	0.0
P19784	Q9UNN4	0	0.0
Q13177	P05412	0	0.0
Q13418	P31749	0	0.0
P19784	Q13526	0	0.0
P19784	Q13526	0	0.0
Q04759	P63244	0	0.0
Q13315	O96017	1	0.655
P24941	P05556	0	0.0
O14757	P49790	0	0.0
P06241	P24666	0	0.0
Q13554	Q9NQC7	0	0.477
Q04759	P28482	0	0.0
Q13131	P50552	0	0.0
P17252	P29350	1	0.928
Q04759	Q5JVS0	0	0.0
P19784	P50281	0	0.0
P24941	P29374	0	0.0
Q9NQU5	Q14118	0	0.0
P27448	Q86UL8	0	0.0
Q9HCP0	Q12778	0	0.0
P28482	P32004	0	0.0
Q7L7X3	Q7KZI7	0	0.0
P49841	Q14194	0	0.0
P54646	P60953	0	0.0
Q16816	Q14118	0	0.0
P19784	Q9UQE7	0	0.0
O75914	P11717	0	0.0
P68400	Q92466	0	0.0
P19784	Q12972	0	0.0
P17252	P19021	0	0.0
Q9UHD2	Q01094	0	0.0
P45983	P05129	0	0.0
P68400	P31749	1	0.6659999999999999
P24941	Q14676	0	0.0
Q8N5S9	P61978	0	0.0
P11309	Q9BZS1	0	0.0
Q8TDX7	P23443	0	0.0
P19784	Q13526	0	0.0
Q8N5S9	Q16566	0	0.0
O14920	P31645	0	0.0
Q92630	O15511	0	0.0
Q00535	P07814	1	0.698
Q15418	Q15366	1	0.6
Q9UBE8	Q8N122	0	0.0
Q9NYV4	P31146	0	0.0
Q9NYV4	O60716	0	0.0
P06493	O00267	1	0.56
Q13315	P16070	1	0.617
Q06187	P51813	0	0.0
O75914	P19429	0	0.0
Q13627	P24928	0	0.0
P19784	Q9Y5B0	0	0.0
P22612	Q8WXH0	0	0.0
P27361	Q7L0J3	0	0.0
P17252	P62834	1	0.762
P25098	P13498	0	0.0
Q9HC98	P52948	0	0.0
P31751	Q92908	0	0.0
P31749	Q6PIY7	0	0.0
Q9NYV4	P24928	0	0.0
P19784	P11021	0	0.0
Q13188	Q9H8S9	0	0.0
Q8TD19	P0DMV8	0	0.0
Q04759	P28482	0	0.0
P06493	P23396	1	0.556
P31751	P14923	0	0.0
P24941	Q9H6K1	0	0.0
P49841	P17275	0	0.0
Q9NQU5	Q92934	0	0.0
Q15382	P15056	0	0.0
P36897	Q12959	0	0.0
P19784	Q15599	0	0.0
P19784	Q13526	0	0.0
P49840	P35222	1	0.514
Q9HC98	O43707	0	0.0
P24941	Q9H7L9	0	0.0
Q9BUB5	P23246	0	0.0
P19784	Q12959	0	0.0
Q9BUB5	P09651	0	0.0
P28482	Q8IZP0	0	0.0
P41240	P09769	0	0.0
Q05513	P60953	0	0.0
P17612	Q92597	1	0.691
P00519	O15269	0	0.0
P06239	Q9BWW4	0	0.0
P19784	P17096	0	0.0
Q8N5S9	P11912	0	0.0
Q96RR4	Q8IU85	0	0.0
Q13237	Q8WXH0	0	0.0
Q04759	P15311	0	0.0
P42336	P23443	0	0.0
P68400	Q92542	1	0.579
P17252	O95644	1	0.919
P53779	P08670	0	0.0
Q9HC98	O00141	0	0.0
P28482	P42261	0	0.0
P06239	Q9Y6W5	0	0.0
Q15139	Q9UBF8	0	0.0
P19784	Q13526	0	0.0
Q96RR4	P54646	0	0.0
Q99558	Q00653	0	0.0
P17252	P11233	1	0.851
P27361	Q96Q27	0	0.0
Q13535	Q8WXH0	0	0.0
Q04759	Q92934	0	0.0
P19784	Q13526	0	0.0
Q13188	O95835	0	0.0
Q16539	O15198	1	0.603
P41279	P19022	0	0.0
P19784	Q9UD71	0	0.0
P31751	P27348	0	0.0
Q16539	P21462	1	0.564
O75914	P04040	0	0.0
P19784	P21673	0	0.0
P19784	P06748	0	0.0
Q683Z8	Q03135	0	0.0
Q8N5S9	Q8IU85	0	0.0
P11362	Q9UBW7	0	0.0
Q7L7X3	O60566	0	0.0
Q16539	P29350	1	0.525
P17612	Q7Z2W7	1	0.789
Q9NYV4	O00560	0	0.0
P12931	P42858	1	0.515
Q13882	Q9NRY4	0	0.0
P48729	Q8TB45	1	0.5379999999999999
P67870	P08473	0	0.0
P19784	P28482	0	0.0
Q04759	P28482	0	0.0
P06493	P61073	1	0.561
P51812	P49840	0	0.0
Q9H2X6	P18846	0	0.0
Q13188	O95835	0	0.0
P68400	Q92974	1	0.736
P27361	O75582	0	0.0
O75914	P04049	0	0.0
A9UF07	P05023	0	0.0
Q04759	P63244	0	0.0
Q9BUB5	P45983	0	0.0
Q13188	P51955	0	0.0
O75914	P31146	0	0.0
P22694	Q14896	0	0.0
P22612	Q92934	0	0.0
O14757	Q14118	0	0.0
Q8TD19	Q8TDX7	0	0.0
P19784	Q02750	0	0.0
P19784	P28482	0	0.0
Q92630	P31645	0	0.0
P43405	P31995	0	0.0
P19784	P51636	0	0.0
P06493	P16615	1	0.5579999999999999
P19784	Q13526	0	0.0
P31751	O15511	0	0.0
P05771	P14679	0	0.0
P12931	O14976	0	0.0
Q04759	P63244	0	0.0
P49137	O15511	0	0.0
P19784	Q9NZU7	0	0.0
P19784	Q13526	0	0.0
Q16816	P04040	0	0.0
P42345	O75912	0	0.0
Q96GD4	P82970	0	0.0
P31751	P98177	0	0.0
Q13237	P50552	0	0.0
P68400	Q96PX8	1	0.633
P22694	P0DMV8	0	0.0
Q9NYV4	P24928	0	0.0
O95382	P04040	0	0.0
Q13315	Q9Y6K9	1	0.563
P19784	P17096	0	0.0
Q99640	O75955	0	0.0
P42684	P10636	0	0.0
P78368	Q12959	0	0.0
Q86Z02	O60829	0	0.0
P28482	Q86WV6	0	0.0
P17252	O76090	1	0.8640000000000001
P22612	P28482	0	0.0
P31749	Q86V81	1	0.672
P28482	P08238	0	0.0
P19784	Q13526	0	0.0
O14757	Q6PD62	0	0.0
Q9HC98	P23443	0	0.0
Q99640	P06493	0	0.0
P42684	O14818	0	0.0
P17612	P47736	1	0.737
P53350	O15143	0	0.0
Q9HC98	Q14118	0	0.0
P19784	Q13526	0	0.0
P17252	P01730	1	0.861
P49137	Q14451	0	0.0
Q9NYL2	Q14155	0	0.0
Q15418	P30050	0	0.481
Q92630	Q02750	0	0.0
P17252	P29350	1	0.928
P51955	Q9BV73	0	0.0
P17252	P25054	1	0.937
Q9UQ88	P04040	0	0.0
Q99640	P11021	0	0.0
P19784	Q01892	0	0.0
P24723	P06396	0	0.0
Q04759	O15530	0	0.0
PR:000029189	P46937	0	0.0
Q9HC98	P0DMV8	0	0.0
P68400	Q08945	1	0.711
O75914	Q05682	0	0.0
Q05655	P61978	0	0.0
Q92630	Q14195	0	0.0
P19784	Q9UNN4	0	0.0
P51812	P31431	0	0.0
P19784	P49795	0	0.0
Q8TD19	P27361	0	0.0
Q99558	P0DMV8	0	0.0
P19784	Q01892	0	0.0
Q04759	P61978	0	0.0
P68400	P01116	0	0.0
P24941	Q6UB35	0	0.0
Q05655	Q16236	0	0.0
P19784	Q13526	0	0.0
O00418	Q13418	0	0.0
A0A173G4P4	Q06609	0	0.0
Q99640	P06493	0	0.0
P06493	O00311	1	0.583
P08637	P06239	0	0.0
P53778	P13861	0	0.0
P19784	Q12959	0	0.0
Q13177	P27824	0	0.0
P45983	P63104	0	0.0
P68400	P13349	1	0.599
Q13188	O95835	0	0.0
Q9NYV4	Q9NYV4	0	0.0
P42680	O75955	0	0.0
P12931	P35790	1	0.545
Q7L7X3	O60566	0	0.0
P24941	P23511	0	0.0
P19784	Q01892	0	0.0
P19784	Q13526	0	0.0
P19784	Q13526	0	0.0
Q96GD4	Q69YH5	0	0.0
P19784	Q13526	0	0.0
P24941	Q96T88	0	0.0
P45983	Q8N122	0	0.0
Q16816	Q16816	0	0.0
Q04759	P63244	0	0.0
Q05655	P13498	0	0.0
P19784	Q13526	0	0.0
P17252	P62834	1	0.762
P27361	P29353	0	0.0
Q9H2X6	O43707	0	0.0
P22694	Q14896	0	0.0
P19784	Q12972	0	0.0
Q04759	P26038	0	0.0
Q05655	P05787	0	0.0
Q9UQM7	P39019	0	0.0
Q13976	P78347	1	0.6759999999999999
P19784	Q05940	0	0.0
P43250	P43250	0	0.0
Q13131	O00429	0	0.0
Q13555	Q03060	0	0.0
P28482	Q9Y4K1	0	0.0
P19784	Q6FHW4	0	0.0
Q92630	Q86UL8	0	0.0
P53778	O00418	0	0.0
Q9NYV4	P13498	0	0.0
Q15569	Q15569	0	0.0
Q6P5Z2	Q6P5Z2	0	0.0
P68400	P01116	0	0.0
Q04759	P63244	0	0.0
Q13233	Q13158	0	0.0
Q8TD19	Q8TD19	0	0.0
Q05655	Q96C90	0	0.0
P78527	P14859	1	0.637
Q9NYV4	P24928	0	0.0
P68400	Q16625	1	0.7390000000000001
P19784	P84090	0	0.0
P31751	Q9Y3M2	0	0.0
Q13131	P07355	0	0.0
P17612	Q14254	1	0.674
Q13188	Q14511	0	0.0
P24941	O15014	0	0.0
P11309	O14974	0	0.0
O15111	Q9Y6Q9	0	0.0
P19784	P09497	0	0.0
P19784	Q13526	0	0.0
P53355	Q9ULV4	0	0.0
Q15418	Q14511	1	0.5770000000000001
Q04759	P28482	0	0.0
Q96BR1	P49841	0	0.0
Q07912	Q96SB3	0	0.0
Q13882	Q15366	0	0.0
P19784	Q13526	0	0.0
Q16816	P10636	0	0.0
Q04759	O14920	0	0.0
P19784	Q9Y5B0	0	0.0
Q14164	P49840	0	0.0
P27361	Q07889	0	0.0
P19784	Q13526	0	0.0
P06493	P39019	1	0.508
P06493	P39019	1	0.508
P19784	Q13526	0	0.0
P00519	Q13177	0	0.0
P19784	P24534	0	0.0
P19784	Q13526	0	0.0
Q9NYV4	O60716	0	0.0
P78527	Q96QB1	1	0.6409999999999999
P19784	P55087	0	0.0
Q8TD19	Q8TD19	0	0.0
P31749	Q9UN36	1	0.8
Q96GD4	P60953	0	0.0
P12931	P30556	0	0.475
P19784	Q13526	0	0.0
P41743	Q7KZI7	0	0.0
Q13315	P16104	0	0.0
Q9HC98	Q08345	0	0.0
P24723	P04040	0	0.0
P19784	P04083	0	0.0
Q96GD4	Q8IX90	0	0.0
P19784	Q13526	0	0.0
Q04759	P63244	0	0.0
Q13153	P78545	0	0.0
P27361	P14923	0	0.0
O14757	P67870	0	0.0
Q9Y3S1	Q9UEW8	0	0.0
P24941	P05556	0	0.0
P51813	Q8TDY4	0	0.0
P68400	Q16832	1	0.593
P51812	P04637	0	0.0
P00533	O00161	0	0.472
P19784	P55957	0	0.0
P28482	O60331	0	0.0
P17612	P39019	0	0.498
Q13976	Q13418	1	0.5329999999999999
P68400	P28482	1	0.563
Q04759	P61978	0	0.0
P42345	Q14289	0	0.0
Q8IYT8	P0DMV8	0	0.0
P49841	Q9UQB3	0	0.0
Q9Y3S1	P13861	0	0.0
P48729	Q03060	1	0.598
P19784	P11021	0	0.0
P49840	P14923	1	0.51
P17252	Q03721	1	0.905
P19784	Q9UNN4	0	0.0
P31751	P61073	0	0.0
P50613	O60674	0	0.0
P19784	P17655	0	0.0
P12931	P42858	1	0.515
Q13976	P62280	0	0.469
P19784	Q13526	0	0.0
Q9BUB5	O43597	0	0.0
Q05655	P17655	0	0.0
P42684	P04040	0	0.0
P68400	P01116	0	0.0
Q04759	P29474	0	0.0
O14757	Q14118	0	0.0
Q92630	Q14194	0	0.0
P49137	Q13151	0	0.0
O14757	Q9HB96	0	0.0
P06493	Q99638	1	0.561
Q9HC98	Q03135	0	0.0
O96013	P49023	0	0.0
P19784	P52655	0	0.0
P12931	P11511	1	0.529
P17252	Q92837	1	0.8109999999999999
Q15208	P27348	0	0.0
P28482	P41743	0	0.0
O14757	Q13418	0	0.0
P24941	P07947	0	0.0
Q9NYV4	P24928	0	0.0
P28482	Q9P2Y5	0	0.0
Q04759	Q9UEW8	0	0.0
P31749	P47870	0	0.0
P19784	Q8WXH0	0	0.0
P17252	Q14289	1	0.917
Q16539	O43521	1	0.5660000000000001
Q14680	Q86UL8	0	0.0
P19784	P67870	0	0.0
Q16539	Q9UL54	0	0.0
Q14680	P61978	0	0.0
Q13188	P13498	0	0.0
Q86Y07	Q9UHP3	0	0.0
P06241	Q16625	0	0.0
Q13976	Q03393	1	0.511
P07947	O00560	0	0.0
Q15831	Q9H093	0	0.0
P78527	P52945	0	0.428
P24941	Q92542	0	0.0
Q13315	Q15831	1	0.596
Q13315	P00749	0	0.405
Q9NYV4	Q8TEW0	0	0.0
P49841	Q9Y624	0	0.0
O75116	Q02750	0	0.0
Q9UQM7	O00631	0	0.0
Q04759	Q9UEW8	0	0.0
Q16539	Q05209	1	0.54
Q13188	P62745	0	0.0
Q9BUB5	P09651	0	0.0
Q14164	P15311	0	0.0
P43250	P04040	0	0.0
P53350	P35241	0	0.0
Q96GD4	P26038	0	0.0
P19784	Q16623	0	0.0
Q13188	Q9H4B6	0	0.0
Q04759	Q3V6T2	0	0.0
P24941	P05556	0	0.0
Q9HC98	P46783	0	0.0
Q9P1W9	O00161	0	0.0
O75914	Q05682	0	0.0
P07948	Q13873	0	0.0
Q04759	Q3V6T2	0	0.0
P05771	P20700	0	0.0
P17612	O14786	0	0.0
Q96RR4	Q14012	0	0.0
Q6IQ55	Q7L0J3	0	0.0
P19784	P13861	0	0.0
Q9BUB5	O43597	0	0.0
Q8N5S9	P19022	0	0.0
P12931	Q08209	0	0.0
P49137	Q96J92	0	0.0
O14757	Q14118	0	0.0
P53778	P13861	0	0.0
P68400	O14950	1	0.698
Q9BUB5	P04792	0	0.0
Q13237	Q86UL8	0	0.0
Q04759	P01116	0	0.0
P12931	P35916	0	0.497
P07948	P52799	0	0.0
Q13555	P0DMV8	0	0.0
P27361	P14923	0	0.0
P00519	Q15139	0	0.0
P05129	P28482	0	0.0
Q15746	P21333	0	0.0
Q13555	P26038	0	0.0
Q9UQM7	Q15121	0	0.0
O14965	P53671	0	0.0
Q00535	O60331	1	0.644
P28482	P49841	0	0.0
P28482	Q9P2Y5	0	0.0
P43405	Q92918	0	0.0
P31749	P29475	0	0.0
Q9NQU5	P62834	0	0.0
Q13464	Q16555	0	0.0
Q96QT4	P13861	0	0.0
Q13535	Q8WXH0	0	0.0
P19784	Q13085	0	0.0
P19784	Q01892	0	0.0
Q04759	Q9BXL7	0	0.0
Q9HC98	P11717	0	0.0
P50613	P04083	0	0.0
P19784	Q13526	0	0.0
P05771	P13498	0	0.0
Q99558	P41743	0	0.0
Q13315	P00749	0	0.405
P06239	Q08881	0	0.0
P19784	P15311	0	0.0
Q92630	P17655	0	0.0
Q9NQU5	P18206	0	0.0
P19784	P24534	0	0.0
Q86Z02	Q9UER7	0	0.0
PR:000026457	Q8TDY4	0	0.0
Q14012	P46527	0	0.0
P17612	P04049	1	0.7909999999999999
Q13976	O76074	1	0.7829999999999999
Q96RR4	Q96RR4	0	0.0
Q9UQ88	O95238	0	0.0
Q9Y3S1	Q12959	0	0.0
P27361	P17655	0	0.0
Q13131	P08670	0	0.0
Q13188	Q03135	0	0.0
Q05655	P54764	0	0.0
Q9NYV4	O00560	0	0.0
P17252	Q05940	1	0.7879999999999999
Q96RR4	Q96EB6	0	0.0
Q15349	P05023	0	0.0
Q04759	P63244	0	0.0
P17252	Q15139	1	0.929
P49840	P20749	1	0.531
Q13315	O14757	1	0.57
Q9BUB5	P09651	0	0.0
O14757	P32004	0	0.0
Q9Y243	P04792	0	0.0
P19784	Q13526	0	0.0
P54646	Q13177	0	0.0
O14965	O60674	0	0.0
P28482	Q13501	0	0.0
P68400	Q13422	1	0.674
Q13315	Q6UWZ7	1	0.624
P51449	Q96RL1	0	0.0
P05771	Q8TEW0	0	0.0
P19784	Q13526	0	0.0
P31749	P05455	1	0.7170000000000001
P19784	Q13526	0	0.0
P17252	P62834	1	0.762
Q8TD19	P0DMV8	0	0.0
P28482	P35658	0	0.0
Q7L7X3	P61073	0	0.0
Q9BWU1	P31645	0	0.0
P42345	Q14289	0	0.0
O00418	P13639	0	0.0
P12931	P41743	0	0.0
Q13188	P13498	0	0.0
Q96RR4	P27348	0	0.0
O00418	O00418	0	0.0
P49841	Q09470	0	0.0
P19784	P18031	0	0.0
P19784	P17655	0	0.0
P00519	Q9UPY6	0	0.0
Q8N5S9	P31749	0	0.0
O14965	Q02224	0	0.0
Q9NQU5	O00560	0	0.0
P28482	Q6NZI2	0	0.0
P24941	O75179	0	0.0
Q05655	P17655	0	0.0
P11802	P28749	0	0.0
P17612	P39019	0	0.498
Q8TD19	P04040	0	0.0
P49841	Q15910	0	0.0
Q15418	P22736	1	0.647
P21127	O00303	0	0.0
P28482	Q07889	0	0.0
Q9BUB5	Q9BR76	0	0.0
P31751	P14923	0	0.0
Q13535	O00203	0	0.0
P00533	O14828	0	0.0
P19784	P51946	0	0.0
P31749	Q92793	1	0.6990000000000001
Q92630	O43255	0	0.0
Q04759	P41594	0	0.0
P19784	Q13526	0	0.0
P19784	Q13144	0	0.0
P11309	Q9UNQ0	0	0.0
Q96RR4	Q02750	0	0.0
P41743	P15311	0	0.0
P19784	P04792	0	0.0
Q8TAI7	P31749	0	0.0
Q99558	Q00653	0	0.0
Q9UEE5	P04637	0	0.0
Q04759	P63244	0	0.0
P17612	Q14254	1	0.674
P68400	O95819	0	0.0
P19784	P21673	0	0.0
Q7KZI7	O15511	0	0.0
Q00535	Q14254	0	0.2689999999999999
P19784	P13861	0	0.0
P06241	P12931	0	0.0
P19784	P42768	0	0.0
P49841	Q96R06	0	0.0
P45983	Q16621	0	0.0
P19784	Q8WXH0	0	0.0
Q13315	P00749	0	0.405
Q13315	P62917	0	0.31
Q9BYP7	Q9UHW9	0	0.0
Q13188	P18754	0	0.0
P19784	P04792	0	0.0
P19784	Q9Y5B0	0	0.0
P45983	Q9NPI6	0	0.0
P19784	P11021	0	0.0
P19784	Q8WXH0	0	0.0
P49841	P36956	0	0.0
P36888	P36888	0	0.0
P19784	O15511	0	0.0
P06493	P23396	1	0.556
P19784	Q13526	0	0.0
P19784	P61978	0	0.0
P00519	P00519	0	0.0
Q13464	P41743	0	0.0
P42345	P62258	0	0.0
Q9Y6K9	P25963	0	0.0
P48729	P31146	0	0.0
Q92630	O43255	0	0.0
P19784	P18887	0	0.0
P22694	P13498	0	0.0
P19784	Q13526	0	0.0
P19784	P17096	0	0.0
Q9BYP7	Q9UHW9	0	0.0
P19784	Q14005	0	0.0
Q96RG2	P68104	0	0.0
Q6IQ55	Q7L0J3	0	0.0
Q13233	O75955	0	0.0
P19784	P52655	0	0.0
P19784	Q13526	0	0.0
Q9NQU5	P53667	0	0.0
P24941	P10721	0	0.0
Q9NYV4	Q14118	0	0.0
P19784	Q13526	0	0.0
P19784	Q13526	0	0.0
P31751	Q9UBK2	0	0.0
Q13188	Q9Y4G8	0	0.0
P11802	Q08999	0	0.0
Q04759	P19022	0	0.0
Q04759	P11021	0	0.0
Q16512	Q6UVK1	0	0.0
O14757	Q9Y4G8	0	0.0
O15111	Q02750	0	0.0
Q15418	P30050	0	0.481
Q92630	Q9Y2V2	0	0.0
P17612	Q14254	1	0.674
Q92630	Q9UHD2	0	0.0
P57059	Q03135	0	0.0
P78527	P15927	1	0.637
P06493	O60610	1	0.569
Q05655	O15511	0	0.0
P78527	Q00839	1	0.631
P27361	Q96QB1	0	0.0
Q02156	O75689	0	0.0
Q99558	O14920	0	0.0
Q9NYV4	Q9NYV4	0	0.0
Q96RR4	P61978	0	0.0
P17252	P10275	1	0.909
P19784	Q13547	0	0.0
Q8IW41	P13498	0	0.0
P17252	Q9NRD5	1	0.862
P78368	Q14457	0	0.0
P19784	Q13526	0	0.0
P19784	Q13526	0	0.0
P43405	P51587	0	0.0
O00418	O00418	0	0.0
P27361	Q86UC2	0	0.0
Q8TD19	Q14118	0	0.0
Q5S007	P78352	0	0.0
P19784	P35372	0	0.0
P43405	P37840	0	0.0
P31749	Q09470	0	0.292
P23443	Q13418	0	0.0
Q04759	Q02750	0	0.0
P68400	Q92681	1	0.643
P19784	P11836	0	0.0
P06241	P05067	0	0.0
P31751	P04792	0	0.0
Q8N5S9	Q16566	0	0.0
P00533	Q14980	1	0.509
Q04759	P04083	0	0.0
Q13976	P31146	0	0.0
P19784	P52655	0	0.0
P08922	Q06124	0	0.0
Q9UKI8	O60716	0	0.0
O14965	O60674	0	0.0
P10398	Q15599	0	0.0
P51449	Q12959	0	0.0
P19784	Q03135	0	0.0
Q9Y5P4	Q14118	0	0.0
P49137	Q9Y4G8	0	0.0
Q9Y243	O75955	0	0.0
Q96GD4	Q9BXS6	0	0.0
Q04759	P63244	0	0.0
A0A173G4P4	O00560	0	0.0
P27448	P28482	0	0.0
Q6IQ55	P61978	0	0.0
Q9HC98	P40763	0	0.0
P17612	Q96CW1	1	0.731
Q13188	P05023	0	0.0
Q13188	O95835	0	0.0
O75914	Q9UM54	0	0.0
P19784	Q13526	0	0.0
P12931	Q05193	0	0.445
P42345	Q8TB45	0	0.0
P53779	P13498	0	0.0
P24941	P49459	0	0.0
Q8IW41	P31152	0	0.0
P19784	P28482	0	0.0
P19784	P09497	0	0.0
Q04759	P63244	0	0.0
O00418	O00418	0	0.0
P06493	Q02952	1	0.595
Q13188	Q9H8S9	0	0.0
P27361	Q13586	0	0.0
Q9NYV4	P24928	0	0.0
P19784	Q9NZU7	0	0.0
Q15569	P04040	0	0.0
P49137	P63104	0	0.0
O14965	O60674	0	0.0
Q9UQM7	Q96PH1	0	0.0
Q9H4B4	Q02750	0	0.0
P19784	Q13526	0	0.0
P48730	P43629	0	0.0
P27448	P30307	0	0.0
P17252	P29350	1	0.928
P43403	P08473	0	0.0
Q13188	Q8TEW0	0	0.0
O00418	P13639	0	0.0
P19784	P11021	0	0.0
P19784	Q13526	0	0.0
P22612	P13861	0	0.0
Q9UQM7	Q96CW1	0	0.0
P19784	Q13526	0	0.0
P22612	Q92934	0	0.0
P31749	Q15910	1	0.728
P06493	P06702	0	0.475
Q02156	Q13153	0	0.0
O00418	Q13418	0	0.0
Q9BYP7	Q8TEW0	0	0.0
P06241	Q8WX93	0	0.0
P19784	P28482	0	0.0
P28482	Q04637	0	0.0
Q8N5S9	Q14012	0	0.0
P17252	P53004	1	0.898
Q13237	Q12778	0	0.0
P17252	O60500	1	0.919
P19784	Q13526	0	0.0
O15530	Q9HBY8	0	0.0
Q13153	P54764	0	0.0
Q92630	Q9Y2V2	0	0.0
O15111	P31645	0	0.0
P17612	O14649	1	0.877
P53779	P16949	0	0.0
P19784	Q13526	0	0.0
P17612	P98082	1	0.56
P53350	Q9Y266	0	0.0
P68400	Q9UJY5	1	0.6759999999999999
P68400	P07910	1	0.662
P28482	P06239	0	0.0
P53350	Q9NS56	0	0.0
P43250	P07550	0	0.0
Q8TD19	Q8TD19	0	0.0
P42345	Q9H1K1	0	0.0
Q02156	P12814	0	0.0
Q9NYV4	P31146	0	0.0
Q04759	Q86UL8	0	0.0
P06493	Q9UHD8	0	0.0
Q16539	P17661	1	0.583
Q04759	Q8WXH0	0	0.0
P19784	Q9UD71	0	0.0
P42345	Q14289	0	0.0
P06241	P14923	0	0.0
Q9UHD2	O14920	0	0.0
Q9NYV4	P25054	0	0.0
Q9HC98	P14859	0	0.0
Q04759	P63244	0	0.0
Q92630	P10070	0	0.0
P19784	Q13526	0	0.0
Q13188	P51955	0	0.0
Q04759	P35372	0	0.0
Q04759	P63244	0	0.0
P78527	P61978	1	0.634
P68400	P01116	0	0.0
P51617	Q9H4G4	0	0.0
P06493	P68400	1	0.653
P17612	Q86V87	1	0.782
Q9NWZ3	Q9NWZ3	0	0.0
P27361	P63000	0	0.0
Q04759	Q13191	0	0.0
Q9BYP7	Q13621	0	0.0
P49841	P39019	0	0.0
Q9HC98	O00141	0	0.0
Q96GD4	Q8IX03	0	0.0
Q04759	P35241	0	0.0
Q99640	P06493	0	0.0
Q13188	Q7L9L4	0	0.0
P28482	Q14686	0	0.0
O14757	Q04837	0	0.0
Q13315	O75150	1	0.56
P06493	Q9Y2I6	1	0.557
O00418	P31146	0	0.0
P19784	Q8WXH0	0	0.0
P41743	Q12846	0	0.0
Q9Y243	O60674	0	0.0
Q13131	P62258	0	0.0
P27448	P30307	0	0.0
P68400	Q15672	1	0.7170000000000001
P28482	Q96RK0	0	0.0
Q9BYP7	P18206	0	0.0
Q9BUB5	P09651	0	0.0
P19784	Q13526	0	0.0
P07949	Q8N4X5	0	0.0
Q15831	Q8TDC3	0	0.0
P45985	P61764	0	0.0
O14757	O43294	0	0.0
Q92630	P28482	0	0.0
Q13188	Q13418	0	0.0
P47710	Q9Y4G8	0	0.0
P19784	O00161	0	0.0
Q96GD4	Q6NZI2	0	0.0
Q9BUB5	P0DMV8	0	0.0
Q9UQM7	P35367	0	0.0
P24941	Q8N3F8	0	0.0
P19784	P55957	0	0.0
P19784	P17096	0	0.0
P24941	P10721	0	0.0
P22694	O43707	0	0.0
Q04759	P63244	0	0.0
P68400	P21673	1	0.626
Q13188	P18206	0	0.0
Q8TDX7	P31645	0	0.0
Q13131	P62258	0	0.0
Q9HC98	P50613	0	0.0
Q13188	Q9H4B6	0	0.0
P19784	Q13526	0	0.0
Q9H4A3	Q8N9I0	0	0.0
O43683	O43684	0	0.0
Q13315	P19022	1	0.578
P06493	Q9Y2J4	1	0.602
Q92630	Q14195	0	0.0
P17252	P38936	1	0.913
Q15418	P11831	1	0.662
P43405	Q9GZY6	0	0.0
Q13188	P06396	0	0.0
Q00535	Q9UM54	0	0.0
P28482	P14672	0	0.0
O14757	P25054	0	0.0
Q9HBH9	P13861	0	0.0
Q13535	P07947	0	0.0
Q8N4C8	Q8IY63	0	0.0
Q9NQU5	P46109	0	0.0
P19784	P61978	0	0.0
Q99558	P61160	0	0.0
Q04759	P63244	0	0.0
P17252	P41743	0	0.0
Q9NYV4	O00560	0	0.0
P22694	P22694	0	0.0
Q00535	P51809	0	0.422
P28482	Q13563	0	0.0
P17252	P62258	1	0.797
P12931	P17600	1	0.525
Q05655	Q9Y698	0	0.0
Q13188	Q7L9L4	0	0.0
Q13535	P40692	0	0.0
P19784	Q13526	0	0.0
P24941	P51649	0	0.0
P19784	Q86UL8	0	0.0
Q9BUB5	P62280	0	0.0
P06493	P23396	1	0.556
P24941	P33151	0	0.0
Q92630	P31645	0	0.0
O75582	P04083	0	0.0
P19784	P11021	0	0.0
Q04759	P63244	0	0.0
P28482	P17535	0	0.0
P04626	P04626	0	0.0
P45984	Q14653	0	0.0
P43403	O43561	0	0.0
P11802	O15294	0	0.0
Q9BUB5	P04792	0	0.0
Q04759	P28482	0	0.0
P24941	Q14195	0	0.0
P17252	P29350	1	0.928
P17252	P11233	1	0.851
P24941	P10244	0	0.0
P78527	P61978	1	0.634
Q05655	O14939	0	0.0
Q04759	P63244	0	0.0
P45983	Q96SB3	0	0.0
Q04759	Q15052	0	0.0
P19784	Q13526	0	0.0
P17252	Q14994	1	0.911
Q13188	P51955	0	0.0
P17612	Q92597	1	0.691
P17612	P16615	1	0.755
P17252	P04049	1	0.916
Q13555	P35270	0	0.0
P19784	P21980	0	0.0
P48730	P35372	0	0.0
Q96KB5	P61978	0	0.0
Q14680	Q13485	0	0.0
Q7L7X3	Q9P0L2	0	0.0
P24941	P24928	0	0.0
Q9Y6K9	Q13418	0	0.0
Q04759	Q5JVS0	0	0.0
P06241	P12931	0	0.0
Q15418	Q15831	1	0.6829999999999999
Q04759	P63244	0	0.0
Q99558	P61160	0	0.0
O00418	O00418	0	0.0
P19784	P61978	0	0.0
Q86Z02	P04083	0	0.0
Q9Y3S1	Q9UEW8	0	0.0
Q9Y5P4	Q01955	0	0.0
P78527	P61978	1	0.634
Q14164	Q12959	0	0.0
Q96GD4	P05204	0	0.0
P07948	P00519	0	0.0
Q15418	P50552	1	0.5379999999999999
P28482	P61978	0	0.0
P68400	P01116	0	0.0
O14757	P36507	0	0.0
P19784	Q13526	0	0.0
P17252	Q02241	1	0.9
P19784	Q13526	0	0.0
P21127	O00303	0	0.0
P06493	O60331	1	0.5710000000000001
P06241	P20963	0	0.0
Q15418	Q8N122	1	0.611
Q04759	P15407	0	0.0
P17612	Q13177	1	0.795
P19784	Q02750	0	0.0
P31749	P29401	1	0.583
Q99558	O15111	0	0.0
P00519	P22681	0	0.0
P17252	O75469	1	0.882
Q9BUB5	P13498	0	0.0
P12931	P06396	1	0.5529999999999999
Q15139	Q12959	0	0.0
P24941	Q86U86	0	0.0
P68400	P07947	1	0.653
P51812	Q14118	0	0.0
P06239	P15311	0	0.0
Q04759	Q86UL8	0	0.0
O75914	Q03135	0	0.0
P19784	Q92769	0	0.0
Q8IV63	O75531	0	0.0
P19784	Q13526	0	0.0
P31749	Q9H4X1	0	0.322
P17252	Q13393	1	0.911
P17612	Q13972	1	0.895
Q13188	P62258	0	0.0
Q2M2I8	P51809	0	0.0
P31749	Q9Y698	0	0.0
P49137	P49815	0	0.0
Q13188	Q7L9L4	0	0.0
Q13188	Q9H492	0	0.0
P43405	Q8WXH0	0	0.0
Q13188	P00523	0	0.0
P24723	Q9BZL6	0	0.0
P17612	P23409	0	0.0
Q9NYV4	P24928	0	0.0
P19784	Q13526	0	0.0
P19784	Q13526	0	0.0
Q04759	P15407	0	0.0
P22612	Q8WXH0	0	0.0
O75914	Q16659	0	0.0
Q9BUB5	P04792	0	0.0
P06493	Q01196	1	0.583
P47710	Q04206	0	0.0
P27361	P09497	0	0.0
Q13188	Q9H4B6	0	0.0
P25098	P15311	0	0.0
Q9HBH9	P23246	0	0.0
P19784	Q13526	0	0.0
P19784	P07910	0	0.0
O75914	O75914	0	0.0
Q8TAI7	P04083	0	0.0
Q92630	P13807	0	0.0
P27448	Q8WUI4	0	0.0
P28482	Q9BZI1	0	0.0
P19784	Q13526	0	0.0
P19784	Q13526	0	0.0
O14757	P61587	0	0.0
P53350	O96017	0	0.0
Q92630	Q9Y2V2	0	0.0
Q02156	P08631	0	0.0
P50613	P03372	0	0.0
P19784	P61978	0	0.0
Q13535	O75717	0	0.0
P19784	P28482	0	0.0
Q9BUB5	O14974	0	0.0
P17612	P39019	0	0.498
P06493	Q14790	1	0.535
P24941	P57740	0	0.0
P25098	P35241	0	0.0
P19784	O75955	0	0.0
P06493	P23396	1	0.556
P19784	P52655	0	0.0
Q13188	P04040	0	0.0
P24941	Q8IXM2	0	0.0
Q9HC98	O43707	0	0.0
Q8N5S9	Q02750	0	0.0
P19784	P17096	0	0.0
P19784	Q13526	0	0.0
Q16539	Q8IW41	1	0.634
Q9P286	P05023	0	0.0
P19784	Q8WXH0	0	0.0
Q13131	Q04759	0	0.0
O75914	Q14118	0	0.0
Q99558	O00560	0	0.0
Q9HC98	P52948	0	0.0
P17612	Q6PIY7	0	0.0
P68400	O75822	1	0.695
Q16539	P41743	0	0.0
Q9BYP7	Q13621	0	0.0
Q04759	P63244	0	0.0
P08922	Q86UL8	0	0.0
Q92630	P17655	0	0.0
Q04759	O15111	0	0.0
P17612	P39019	0	0.498
P19784	P60484	0	0.0
Q6IQ55	P17655	0	0.0
P27448	P41236	0	0.0
P24941	Q14161	0	0.0
P42345	P27824	0	0.0
O14757	Q14847	0	0.0
P31749	P38936	1	0.778
P28482	P08238	0	0.0
Q9NYV4	P63104	0	0.0
P22694	P06396	0	0.0
P17252	Q8N0W4	1	0.905
P28482	O75582	0	0.0
P53350	Q9BVS4	0	0.0
P19784	Q14005	0	0.0
P23443	Q8TB45	0	0.0
Q04759	O14974	0	0.0
P17612	P39019	0	0.498
Q96GD4	P26038	0	0.0
P17252	P29350	1	0.928
Q13315	Q8TAQ2	1	0.63
Q05655	Q14896	0	0.0
O14757	Q9GZR7	0	0.0
P24941	O15511	0	0.0
P42345	Q9Y2J4	0	0.0
Q15418	Q16821	1	0.597
Q00535	Q96RR4	1	0.76
O14757	P46013	0	0.0
P19784	P17655	0	0.0
Q15349	P25963	0	0.0
Q99558	Q9BR76	0	0.0
Q13177	P62805	0	0.0
Q8IVT5	P04049	0	0.0
Q9P1W9	P41279	0	0.0
P19784	Q96SB4	0	0.0
Q96RR4	O00161	0	0.0
P06241	Q96LC7	0	0.0
Q13131	P11233	0	0.0
Q8TD19	Q6UVK1	0	0.0
Q96S44	P62745	0	0.0
Q15300	O00560	0	0.0
Q92630	O75449	0	0.0
Q9BYP7	P55011	0	0.0
Q8TD19	P62745	0	0.0
O00418	O00418	0	0.0
P28482	P17252	0	0.0
O95382	P45983	0	0.0
P45984	P13861	0	0.0
Q13315	Q92945	1	0.643
P22694	Q14896	0	0.0
Q92630	Q14195	0	0.0
Q13976	Q15052	1	0.6659999999999999
P19784	P18887	0	0.0
P24941	Q92542	0	0.0
Q9P286	P15976	0	0.0
Q96BR1	P35372	0	0.0
P27361	Q96FF9	0	0.0
Q9HC98	P23443	0	0.0
P68400	Q96FW1	1	0.601
P28482	P24941	0	0.0
Q92630	Q13541	0	0.0
P12931	O00560	0	0.424
P27361	Q01860	0	0.0
Q92630	P61978	0	0.0
Q13188	Q14118	0	0.0
P51617	P0DMV8	0	0.0
P31749	P29475	0	0.0
P23443	Q9Y4G8	0	0.0
P19784	Q01892	0	0.0
P78527	P42575	1	0.616
P19784	P06748	0	0.0
P48729	Q9H6E5	1	0.568
Q00535	Q16643	1	0.679
P19784	Q13526	0	0.0
Q04759	P63244	0	0.0
Q8N5S9	P51636	0	0.0
Q9BUB5	O00560	0	0.0
P00519	Q00987	0	0.0
P31749	Q9P0V3	0	0.0
P43250	P04040	0	0.0
Q9NYV4	Q9NYV4	0	0.0
P34947	P17655	0	0.0
Q15418	P03372	1	0.647
Q13315	P12830	1	0.539
P19784	P11836	0	0.0
Q92630	Q14195	0	0.0
Q96BR1	P49840	0	0.0
P19784	P15529	0	0.0
Q9HC98	O60716	0	0.0
P19784	P61978	0	0.0
P00519	P15311	0	0.0
P17612	P35240	1	0.6409999999999999
P17612	Q96CW1	1	0.731
P68400	Q9H2G2	0	0.0
P68400	Q07954	1	0.758
P06493	P62136	1	0.519
P17252	P01116	0	0.0
P17612	Q96NW7	0	0.0
P19784	Q13526	0	0.0
Q9Y243	Q9UKV8	0	0.0
Q9NYV4	Q9NYV4	0	0.0
Q04759	O43516	0	0.0
P68400	P01116	0	0.0
P53350	Q9Y2T1	0	0.0
P48730	P35372	0	0.0
P22694	P30518	0	0.0
Q16566	P23396	0	0.0
Q9HC98	Q14118	0	0.0
P06239	P27986	0	0.0
O00418	Q9Y4G8	0	0.0
Q04759	P11021	0	0.0
P19784	P84090	0	0.0
Q9NYV4	P31749	0	0.0
P19784	Q13526	0	0.0
P12931	P42224	0	0.4379999999999999
P49841	Q15208	0	0.0
P17252	P15382	0	0.0
P19784	Q13526	0	0.0
O14757	Q9UJM3	0	0.0
P68400	P49427	1	0.713
P19784	Q13526	0	0.0
P51955	Q14118	0	0.0
Q96GD4	Q03135	0	0.0
Q99640	P06493	0	0.0
Q13315	P00749	0	0.405
P68400	Q92542	1	0.579
P68400	P11387	1	0.629
O14757	Q9Y3Y2	0	0.0
Q9H4B4	P30304	0	0.0
Q13418	P04083	0	0.0
P35626	P30874	0	0.0
P06241	Q9UQB3	0	0.0
P07949	Q8TEW0	0	0.0
O14757	P23458	0	0.0
P06241	P31994	0	0.0
P19784	P32121	0	0.0
P17612	P48729	1	0.784
Q13153	Q13233	0	0.0
Q38SD2	P06396	0	0.0
P27361	P27824	0	0.0
P19784	Q13526	0	0.0
Q8TDX7	P27348	0	0.0
P19784	Q13526	0	0.0
Q96GD4	P35659	0	0.0
Q9BWU1	O00303	0	0.0
P48730	O14641	0	0.0
Q99558	P11717	0	0.0
Q13976	P31146	0	0.0
Q00535	P36507	1	0.5670000000000001
P19784	Q8WXH0	0	0.0
P17252	Q06124	1	0.914
P17252	P07737	1	0.845
Q9UQM7	P61978	0	0.0
O14757	Q7Z2Z1	0	0.0
P42680	P16885	0	0.0
Q04759	P17655	0	0.0
P19784	P11021	0	0.0
O00141	P46527	0	0.0
Q9UKI8	Q99638	0	0.0
O96017	Q15717	0	0.0
P19784	P67870	0	0.0
Q04759	P15311	0	0.0
Q9NQU5	Q9BY11	0	0.0
P19784	P17931	0	0.0
Q9NYV4	Q9NYV4	0	0.0
Q96RR4	Q16566	0	0.0
O43683	P62834	0	0.0
Q96GD4	Q9UKV0	0	0.0
P22694	P08138	0	0.0
P28482	Q13485	0	0.0
Q04759	P63244	0	0.0
Q6P5Z2	P30622	0	0.0
Q99640	Q86UL8	0	0.0
Q13976	Q8WZ42	1	0.684
Q04759	Q9BXL7	0	0.0
Q92630	Q02750	0	0.0
Q04759	Q5JVS0	0	0.0
Q15569	Q9Y281	0	0.0
Q04759	Q9BXL7	0	0.0
P19784	Q01892	0	0.0
P19784	Q86UL8	0	0.0
P41240	P06396	0	0.0
P19784	P00749	0	0.0
P22612	P61978	0	0.0
A9UF07	P46109	0	0.0
Q96KB5	P68431	0	0.0
P19784	P61978	0	0.0
Q04759	P63244	0	0.0
Q92630	Q92630	0	0.0
Q16816	P10636	0	0.0
Q96L34	P05023	0	0.0
P19784	P09497	0	0.0
Q9UQM7	Q13177	0	0.0
Q9H2X6	P11717	0	0.0
P00533	Q9P0J1	1	0.618
Q16584	Q16584	0	0.0
P19784	Q13526	0	0.0
P28482	Q9P2Y5	0	0.0
P19784	Q13526	0	0.0
Q00535	P06729	0	0.0
P12931	P14923	1	0.52
Q04759	P10588	0	0.0
O00418	O00418	0	0.0
Q99558	P25963	0	0.0
P54764	Q00535	0	0.0
P19784	P28482	0	0.0
Q6IQ55	P00749	0	0.0
Q6P2M8	O43432	0	0.0
P19784	P13349	0	0.0
P43405	P05106	0	0.0
P19784	P17655	0	0.0
P11802	P07355	0	0.0
P19784	Q13526	0	0.0
P19784	P06748	0	0.0
Q6IQ55	Q7L0J3	0	0.0
Q04759	P35236	0	0.0
Q13464	O60237	0	0.0
P68400	O75955	1	0.655
P68400	P01116	0	0.0
Q04759	Q12959	0	0.0
Q13188	O60716	0	0.0
P19784	P52655	0	0.0
Q13188	P38646	0	0.0
P53350	Q96SB3	0	0.0
O75914	P17600	0	0.0
Q96L34	Q96L34	0	0.0
Q9UQ88	O95238	0	0.0
Q8N5S9	Q16625	0	0.0
Q9UQ88	P21127	0	0.0
Q9NWZ3	Q03135	0	0.0
Q9BZL6	Q15366	0	0.0
P19784	Q13526	0	0.0
Q9NYV4	P24928	0	0.0
P12931	O00560	0	0.424
Q13131	P46940	0	0.0
Q8N5S9	Q8IU85	0	0.0
P31749	P10275	1	0.838
Q99558	P62280	0	0.0
P19784	P61978	0	0.0
Q04759	P63244	0	0.0
Q92630	P10636	0	0.0
Q96GD4	P31431	0	0.0
P41743	Q6P1M3	0	0.0
Q05655	P08473	0	0.0
P17252	P10301	1	0.78
Q8IW41	O15143	0	0.0
P27361	P14923	0	0.0
P24941	O95295	0	0.0
P17612	P63252	1	0.8540000000000001
Q9NYV4	P24928	0	0.0
Q05655	Q05655	0	0.0
Q13188	P17252	0	0.0
P17612	P27815	1	0.774
P06241	Q16625	0	0.0
P19784	Q12959	0	0.0
P19784	P61978	0	0.0
P68400	Q92974	1	0.736
Q9UQ88	P27361	0	0.0
P68400	Q14493	1	0.6859999999999999
P17612	P33076	1	0.805
P07948	Q13291	0	0.0
P19784	P55957	0	0.0
Q96RR4	P17655	0	0.0
Q04759	P28482	0	0.0
P19784	Q13526	0	0.0
O15530	Q15349	0	0.0
Q13535	P54132	0	0.0
P27448	P28482	0	0.0
P67775	O43524	0	0.0
Q9UEW8	P13861	0	0.0
Q8N5S9	P28482	0	0.0
P68400	P14317	1	0.6920000000000001
P17612	P06400	1	0.738
Q9UL54	Q9UL54	0	0.0
Q04759	P04083	0	0.0
P17612	P36955	1	0.825
Q15118	P23443	0	0.0
P22612	P29474	0	0.0
P19784	O00161	0	0.0
Q8TD19	P0DMV8	0	0.0
Q04759	Q02750	0	0.0
P19784	P41236	0	0.0
Q9Y243	Q13188	0	0.0
P24941	P17096	0	0.0
Q9NYV4	Q9NYV4	0	0.0
P19784	Q6FHW4	0	0.0
P19784	P17931	0	0.0
P78527	Q14344	1	0.639
P28482	Q6NZI2	0	0.0
P42684	P0DMV8	0	0.0
Q04759	Q9UEW8	0	0.0
Q8N5S9	Q13131	0	0.0
Q06187	Q6UVK1	0	0.0
P19784	O00161	0	0.0
P19784	P04792	0	0.0
Q8N5S9	Q8TDC3	0	0.0
O14757	Q13257	0	0.0
O75582	Q15831	0	0.0
P19784	Q13526	0	0.0
P28482	P07900	0	0.0
P45985	P19793	0	0.0
Q9BUB5	P04792	0	0.0
Q15300	Q15300	0	0.0
Q05513	P11717	0	0.0
Q13464	P62834	0	0.0
Q04759	P35236	0	0.0
P10644	Q12959	0	0.0
P42336	P62258	0	0.0
P53350	Q9BR76	0	0.0
Q04759	P63244	0	0.0
Q13131	O43524	0	0.0
Q16816	P62258	0	0.0
P31749	P35222	0	0.29
Q9BUB5	P04792	0	0.0
Q9BUB5	P06730	0	0.0
P51812	Q2M1Z3	0	0.0
P12931	O15056	1	0.545
Q9HC98	Q13418	0	0.0
O15111	O15511	0	0.0
P43405	P51636	0	0.0
Q13464	P04637	0	0.0
P24941	Q99439	0	0.0
P31749	Q13043	1	0.601
Q04759	P11912	0	0.0
P19784	Q13526	0	0.0
P19784	Q02750	0	0.0
O00418	P13639	0	0.0
P17612	P17655	1	0.848
Q9BYP7	Q9UK17	0	0.0
Q15831	Q14155	0	0.0
O14757	P32004	0	0.0
P19784	P04198	0	0.0
Q16816	O00560	0	0.0
Q99558	O14920	0	0.0
Q04759	P50570	0	0.0
P42684	O00560	0	0.0
Q92630	Q02750	0	0.0
P68400	O75955	1	0.655
P19784	Q13526	0	0.0
P06493	O75122	1	0.568
P19784	Q13526	0	0.0
P49841	Q8WX93	0	0.0
Q05655	P53004	0	0.0
P19784	P13349	0	0.0
Q13177	P01236	0	0.0
Q9NYV4	P24928	0	0.0
O75914	Q9Y4G8	0	0.0
P07949	P31749	0	0.0
Q16816	P10636	0	0.0
Q13188	P0DMV8	0	0.0
P07948	P13569	0	0.0
P19784	P06748	0	0.0
P24941	O15511	0	0.0
Q16539	P52945	1	0.5479999999999999
P19784	O14958	0	0.0
P17612	Q14254	1	0.674
Q8N5S9	P28482	0	0.0
P12931	P46940	1	0.504
P19784	Q13526	0	0.0
Q9P286	P31146	0	0.0
P28482	Q9P2Y5	0	0.0
P19784	O00161	0	0.0
P19784	P17655	0	0.0
Q92630	P04083	0	0.0
P17252	P62834	1	0.762
P28482	P49841	0	0.0
Q15418	P13498	0	0.446
P19784	P35372	0	0.0
Q9BUB5	Q8TEW0	0	0.0
P53779	P04637	0	0.0
P10644	P04439	0	0.0
O00418	P27361	0	0.0
Q9HC98	P06396	0	0.0
Q96RR4	P11021	0	0.0
Q16816	P10636	0	0.0
P17252	Q14676	1	0.897
Q99558	Q14118	0	0.0
P19784	Q9Y5B0	0	0.0
P45983	P08047	0	0.0
Q15759	Q8TDY4	0	0.0
P19784	Q12972	0	0.0
P19784	Q13526	0	0.0
P19784	Q13526	0	0.0
P53779	Q6UVK1	0	0.0
P06241	P12318	0	0.0
P22694	P04040	0	0.0
P24941	Q9P2B4	0	0.0
P43405	P61073	0	0.0
P05771	P48736	0	0.0
Q92630	P31645	0	0.0
P68400	O95819	0	0.0
Q8IW41	O00418	0	0.0
Q8TD19	P62745	0	0.0
Q9H4B4	P05412	0	0.0
P11802	P07355	0	0.0
Q13131	Q7Z3C6	0	0.0
P06493	Q9BPX3	1	0.5579999999999999
P28482	P30041	0	0.0
P28482	O00429	0	0.0
P19784	Q13526	0	0.0
Q04759	P63244	0	0.0
Q96GD4	P63104	0	0.0
P19784	P37840	0	0.0
Q04759	P15407	0	0.0
Q8TD19	Q9HC98	0	0.0
Q7L7X3	P28482	0	0.0
P19784	P11021	0	0.0
Q9Y2U5	O14733	0	0.0
P19784	Q8WXH0	0	0.0
Q04759	Q9UEW8	0	0.0
Q9NYV4	Q9NYV4	0	0.0
Q04759	P31645	0	0.0
Q9Y3S1	Q9H4A3	0	0.0
P17612	Q14254	1	0.674
P22607	O14786	0	0.0
Q13882	Q99704	0	0.0
Q6IQ55	Q15599	0	0.0
Q92630	Q05513	0	0.0
Q13188	P00523	0	0.0
O75914	Q02750	0	0.0
P31749	Q9UKV3	1	0.805
Q04759	Q92542	0	0.0
Q99558	O43707	0	0.0
Q16816	P04040	0	0.0
Q00535	P17600	1	0.698
O75582	Q12959	0	0.0
Q15569	P23528	0	0.0
P07948	Q13873	0	0.0
Q05655	P04637	0	0.0
Q13153	O95863	0	0.0
P06241	P51809	0	0.0
P45984	P13861	0	0.0
Q92630	P43686	0	0.0
Q8N5S9	Q16566	0	0.0
P24941	P05556	0	0.0
Q6IQ55	P28482	0	0.0
Q13131	P05023	0	0.0
Q9NYV4	P31146	0	0.0
Q92630	P04637	0	0.0
P19784	Q12959	0	0.0
P06493	O00429	1	0.542
P36897	Q96FW1	0	0.0
PR:000026196	Q15796	0	0.0
P19784	P04198	0	0.0
P22612	P35372	0	0.0
P19784	Q13526	0	0.0
O00418	P18206	0	0.0
P41279	Q13541	0	0.0
Q92630	P10636	0	0.0
Q13131	P12814	0	0.0
P49841	Q92597	0	0.0
P22612	Q14896	0	0.0
P41743	Q9UQB8	0	0.0
P24941	P17676	0	0.0
Q05513	Q8IX03	0	0.0
Q13535	P38398	0	0.0
P19784	Q13526	0	0.0
P68400	P45973	1	0.758
Q02156	Q14160	0	0.0
Q8TD19	Q8TD19	0	0.0
P28482	Q96SB3	0	0.0
Q9UHD2	Q16625	0	0.0
P24941	P07947	0	0.0
P06493	P31948	1	0.527
P19784	P52655	0	0.0
P31751	O60331	0	0.0
P17252	P08034	0	0.0
P19784	P04083	0	0.0
P28482	Q12778	0	0.0
Q13464	P53671	0	0.0
Q9UPZ9	Q8N122	0	0.0
P19784	P17655	0	0.0
Q13535	Q9BXW9	0	0.0
P19784	O15511	0	0.0
O00418	O00418	0	0.0
Q96GD4	P60953	0	0.0
P07332	P11021	0	0.0
O14920	O00161	0	0.0
Q13177	P27824	0	0.0
P27361	Q16625	0	0.0
Q99558	O15111	0	0.0
O75914	P06396	0	0.0
P17252	P62258	1	0.797
Q13237	P32929	0	0.0
P19784	P22681	0	0.0
P19784	Q6FHW4	0	0.0
P19784	Q9Y5B0	0	0.0
P49841	P30281	0	0.0
P31749	P23396	1	0.807
Q16539	P62834	0	0.433
Q92630	P12931	0	0.0
Q2M2I8	Q9BXS5	0	0.0
P19784	P11021	0	0.0
P19784	P28482	0	0.0
Q92630	Q12959	0	0.0
P06241	Q16625	0	0.0
P19784	P60484	0	0.0
Q6P5Z2	P00533	0	0.0
Q13535	P35372	0	0.0
O75914	P04049	0	0.0
Q04759	P63244	0	0.0
Q13464	P17661	0	0.0
Q13153	P54764	0	0.0
Q9UM73	P14618	0	0.0
P45984	P31947	0	0.0
P22612	Q16625	0	0.0
Q04759	P31645	0	0.0
P12931	Q4VCS5	1	0.575
P28482	P08238	0	0.0
P19784	Q13526	0	0.0
P17252	P43629	1	0.917
P11802	Q9BQA1	0	0.0
P45983	P63104	0	0.0
Q9UM73	Q06124	0	0.0
P54646	P06241	0	0.0
Q15831	P35372	0	0.0
Q14164	O95786	0	0.0
Q13188	P46937	0	0.0
P31749	Q09470	0	0.292
A0A173G4P4	P04040	0	0.0
P31749	O14640	0	0.0
Q96GD4	P17948	0	0.0
Q15300	P40763	0	0.0
Q02156	Q99259	0	0.0
P19784	P17096	0	0.0
Q14680	Q99683	0	0.0
Q9NYV4	O43707	0	0.0
P31152	P0DMV8	0	0.0
P12931	Q13444	0	0.4479999999999999
Q04759	P63244	0	0.0
Q04759	O43516	0	0.0
Q13315	P00749	0	0.405
P17252	Q9NQA5	1	0.913
P53778	P26045	0	0.0
P19784	Q13526	0	0.0
P07947	P08172	0	0.0
Q9HC98	O00141	0	0.0
Q00535	Q15833	0	0.0
O14757	Q9UPP1	0	0.0
P27361	O43521	0	0.0
Q13627	P05023	0	0.0
P51813	P08581	0	0.0
Q13535	Q8WXH0	0	0.0
P19784	Q92598	0	0.0
Q8TD19	P46783	0	0.0
P19784	Q13526	0	0.0
P28482	P19438	0	0.0
Q13153	Q96A00	0	0.0
P19784	P55087	0	0.0
P67870	P06748	0	0.0
Q13188	O00560	0	0.0
O14730	Q9BYX4	0	0.0
Q8TD19	Q8TD19	0	0.0
Q13557	P26678	0	0.0
Q13315	P00749	0	0.405
P19784	Q13526	0	0.0
P54764	P19174	0	0.0
Q9Y243	P22681	0	0.0
P19784	P04083	0	0.0
P28482	Q9C0C2	0	0.0
P31749	Q14643	1	0.628
P19784	P41236	0	0.0
Q5S007	P04637	0	0.0
P24941	Q96RK0	0	0.0
Q9NQU5	P10275	0	0.0
Q9BWU1	Q13153	0	0.0
P28482	P08238	0	0.0
Q14164	Q96FA3	0	0.0
Q04759	Q02750	0	0.0
P28482	P33981	0	0.0
Q9UM73	P04083	0	0.0
Q92630	O43602	0	0.0
P00519	Q9Y624	0	0.0
Q14680	P84022	0	0.0
Q9BUB5	P04040	0	0.0
P57059	Q53ET0	0	0.0
Q04759	Q04759	0	0.0
Q13131	P07355	0	0.0
P19784	Q01892	0	0.0
P19784	Q02750	0	0.0
P19784	P11021	0	0.0
P06493	P29590	1	0.5529999999999999
Q7KZI7	Q8WUI4	0	0.0
P17252	P61764	0	0.0
Q05655	P17655	0	0.0
Q15139	Q99683	0	0.0
P24941	P62841	0	0.0
P00519	Q15746	0	0.0
P12931	Q08209	0	0.0
Q15208	Q96RD6	0	0.0
Q9UL54	P11021	0	0.0
P19784	P18887	0	0.0
P27361	P14923	0	0.0
P68400	P01116	0	0.0
Q92630	P10070	0	0.0
Q13535	P35372	0	0.0
Q04759	P63244	0	0.0
P17612	P16615	1	0.755
Q99558	O14920	0	0.0
P24941	Q8IXM2	0	0.0
P19784	Q13526	0	0.0
Q9NYV4	Q03135	0	0.0
P07947	Q05655	0	0.0
Q13315	Q5TZA2	0	0.0
P17612	Q96NW7	0	0.0
O14920	P25963	0	0.0
Q9HC98	Q05586	0	0.0
P30530	P30530	0	0.0
P48729	Q13418	0	0.437
P19784	Q16543	0	0.0
O96013	P55072	0	0.0
O75582	Q92934	0	0.0
O14920	Q96CV9	0	0.0
P23443	Q92934	0	0.0
P78527	P55895	1	0.648
Q16816	P10636	0	0.0
P50613	Q00534	0	0.0
P19784	Q12972	0	0.0
P17252	P32004	1	0.873
P48729	Q00535	1	0.546
Q96S44	P04637	0	0.0
Q02156	P35241	0	0.0
O14757	Q2M1Z3	0	0.0
Q9BYP7	P18206	0	0.0
P19784	Q9UD71	0	0.0
P22612	Q14896	0	0.0
P19784	P61978	0	0.0
Q9HC98	P18206	0	0.0
Q9HC98	Q13418	0	0.0
P24941	P12268	0	0.0
Q99558	P05023	0	0.0
P19784	P17655	0	0.0
O00418	P62258	0	0.0
P31751	P29474	0	0.0
Q9UQM7	Q06210	0	0.0
P28482	Q9UK17	0	0.0
Q04759	O15530	0	0.0
P19784	Q05513	0	0.0
P06493	P39019	1	0.508
Q15569	P13498	0	0.0
P48729	Q13148	1	0.507
P68400	P62917	1	0.515
Q6P5Z2	P28482	0	0.0
P51812	P13796	0	0.0
P49841	O60341	0	0.0
Q13188	Q9H4B6	0	0.0
O96017	Q14344	0	0.0
P24941	Q9UHR4	0	0.0
Q6IQ55	O00139	0	0.0
Q15418	P26038	1	0.616
P19784	Q13526	0	0.0
Q05513	P35579	0	0.0
Q96GD4	P45973	0	0.0
P31751	P00749	0	0.0
P17252	Q9UJY1	1	0.802
Q92630	P05412	0	0.0
Q15759	O60381	0	0.0
P19784	Q02750	0	0.0
Q13464	P05023	0	0.0
P68400	O75955	1	0.655
P19784	P28482	0	0.0
P28482	Q9NRA0	0	0.0
Q16816	P27361	0	0.0
P42345	Q00613	0	0.0
Q15569	P31146	0	0.0
P27361	Q15599	0	0.0
P54764	Q9UJU6	0	0.0
P28482	Q92934	0	0.0
P19784	P17655	0	0.0
P41743	P19022	0	0.0
P19784	Q01892	0	0.0
P17612	P39019	0	0.498
Q7L7X3	P46734	0	0.0
Q99558	Q00653	0	0.0
P28482	Q9H3Z4	0	0.0
Q9NQU5	Q9NQU5	0	0.0
P22612	Q14896	0	0.0
Q9NQU5	Q00987	0	0.0
Q04759	O15111	0	0.0
P19784	Q712K3	0	0.0
P19784	P61978	0	0.0
Q96RR4	P17655	0	0.0
P12931	Q00987	1	0.514
P17612	Q05469	1	0.813
Q9HC98	Q03135	0	0.0
O00418	O00418	0	0.0
P19784	P28482	0	0.0
Q9UQ88	P0DMV8	0	0.0
P17252	P02686	1	0.8909999999999999
Q04759	P04083	0	0.0
P24941	P15172	0	0.0
Q9HC98	O00141	0	0.0
O14757	O15350	0	0.0
P12931	P36544	0	0.48
Q16539	P10636	1	0.627
Q16539	Q14765	0	0.0
P49841	Q9UQB3	0	0.0
[truncated: 407 more rows]
