# Supplementary material for: A knowledge graph representation learning approach to predict novel kinase–substrate interactions
Source: Royal Society of Chemistry journal article supplement (doi:10.1039/d1mo00521a), 2022-08-17
Supplement: d1mo00521a7.csv [file d1mo00521a7.csv]

model	score_type	score_value
triplewalk	au-roc	0.7694873373507213
triplewalk	precision	0.6214160327677004
triplewalk	recall	0.8827930174563591
linkphinder	au-roc	0.757043730380339
linkphinder	precision	0.6061751732829238
linkphinder	recall	0.799667497921862
networkin	au-roc	0.5563014740787267
networkin	precision	0.5951417004048583
networkin	recall	0.36658354114713215
phosphopredict	au-roc	0.5563014740787267
phosphopredict	precision	0.5951417004048583
phosphopredict	recall	0.36658354114713215
netphos	au-roc	0.5254800792421827
netphos	precision	0.6174698795180723
netphos	recall	0.17040731504571904
scansite	au-roc	0.5333258706931756
scansite	precision	0.6057142857142858
scansite	recall	0.17622610141313383
