# Supplementary material for: A knowledge graph representation learning approach to predict novel kinase–substrate interactions
Source: Royal Society of Chemistry journal article supplement (doi:10.1039/d1mo00521a), 2022-08-17
Supplement: d1mo00521a8.csv [file d1mo00521a8.csv]

head	tail	label	score
P45983	Q08209	1	0.5024738026523738
P19784	Q9Y5B0	1	0.6552768329554043
P05129	P11388	1	0.9331079809546194
P06493	P61073	0	0.3336957353636375
P49841	P53396	1	0.8284133194847483
Q13131	Q9UQK1	1	0.8318288435550342
P06493	Q9Y2V2	1	0.9373354291211432
P19784	Q03060	1	0.7367017109874253
Q7L7X3	O60566	1	0.9953571428571428
P53350	P31431	1	0.5076776133918991
Q9BUB5	P47712	1	0.8678402219473648
Q16539	P41743	0	0.2917442445121017
P28482	Q05209	0	0.2431981906981907
P19784	Q13526	1	0.642219559540988
P53355	P40429	1	0.824695767195767
P19784	O60674	1	0.6213877722806292
Q683Z8	P04637	0	0.0
Q9H4B4	P11021	0	0.2208028628117914
Q04759	Q02750	0	0.2447789401956068
P19784	Q00613	1	0.7315448759315218
Q8IW41	O43524	1	0.8552624197005729
P06493	Q13586	1	0.960528155706727
P28482	Q13563	1	0.7828785301999589
P31749	P54274	1	0.9021067821067822
P53350	P30260	1	0.6592625630471254
P27361	P14923	0	0.0873990243017336
P51812	P05114	1	0.9414299954431534
P28482	Q13501	1	0.9263473167044596
Q9BUB5	P13498	0	0.2397861265718408
P48729	Q9Y4G8	0	0.248916810702525
Q8TD19	Q8TD19	0	0.0
P27361	Q9UHB6	1	0.8915626503126504
P05771	P13498	0	0.1219355974713117
O15530	Q16513	0	0.2337055797864068
P22612	Q14896	1	0.8454953875489593
Q04759	P15311	0	0.4921540914345534
O14965	Q14203	1	0.8561130866488009
P06493	O43521	1	0.9658597883597884
P19784	Q99801	1	0.6601568405139834
P49840	P22415	1	0.8065584415584417
Q04759	P63244	1	0.8607416978020316
Q8IWU2	P11216	1	0.7194243124600268
P06493	P52732	1	0.6887235856596757
P19784	Q13526	1	0.642219559540988
P19784	Q13526	1	0.642219559540988
Q92630	P35372	0	0.1645503867825297
P24941	P62841	1	0.710982228750086
Q04759	Q5JVS0	1	0.8838644886859172
P22612	Q13185	1	0.8606390434961866
Q9NYV4	P24928	1	0.696365697794269
O14757	P52292	1	0.8275508486222772
Q9UBE8	P0DMV8	0	0.0515315702815702
O00418	O00418	0	0.0
Q13976	Q76M96	1	0.7518335910121624
Q13237	P17655	0	0.1336200955129526
P06241	P16885	1	0.9809382086167804
Q92630	P17655	0	0.219852434757897
P28482	P05198	1	0.9240297533154674
P17252	P62834	0	0.1568711777640349
P19784	P11836	1	0.7037920875420876
P24941	P22674	1	0.7148507180650037
P19784	Q8WXH0	1	0.7676248024462312
P06493	P07947	1	0.5421361720290292
P17252	Q07869	1	0.7483251933251933
Q92630	P17655	0	0.219852434757897
Q7L7X3	P11912	1	0.5070406660138803
Q14004	P24928	1	0.932531156534916
Q05655	Q9Y698	1	0.7607574304002876
Q8IWQ3	P10636	1	0.9186555177626604
P06241	P61586	1	0.6358885492814065
P12931	Q9UKW4	1	0.7422665000343572
P19784	Q13526	1	0.642219559540988
P28482	P51170	1	0.9556331168831168
P19784	Q13526	1	0.642219559540988
Q92630	O43255	1	0.8374206349206347
Q15746	O14950	1	0.920908509479938
P22607	P22607	0	0.0
P42345	Q5T4S7	1	0.6664151574885574
O75116	P35241	0	0.2671192299763729
PR:000029189	O00560	0	0.0
P68400	Q9Y365	1	0.6620928674500103
P23443	P30050	0	0.0670782656496942
Q13188	Q9H8S9	1	0.909832905190048
O15530	Q15700	1	0.8423655890348439
P51449	Q13541	0	0.0
P24723	Q06124	1	0.7729475550904125
P78368	Q15555	1	0.7116729368515081
Q04759	P63244	1	0.8607416978020316
Q8IWU2	P17813	1	0.672798765629776
Q04759	O14920	1	0.9204657974300832
Q13627	P55211	1	0.9070951072736788
Q13315	Q9UQR1	1	0.7384015204372343
Q9BYP7	Q9H4A3	1	0.7170189136260563
Q13882	P31749	1	0.8166000961213727
P17612	Q92597	1	0.8964755020112162
Q04759	Q04759	0	0.0
P49840	P61586	1	0.7764800375514661
Q04759	P63244	1	0.8607416978020316
Q8TD19	Q9HC98	1	0.5317395038823608
Q16584	P0DMV8	0	0.0676615290839428
P45983	P30307	1	0.9875
P17252	P29350	1	0.7657004787151847
P27361	Q07954	1	0.5322301508015792
Q8N5S9	P31749	1	0.8188553906411047
P19784	P42768	1	0.7217619087261945
P28482	P17480	1	0.8405814251885682
P28482	P08238	1	0.8843771902700476
P19784	P28482	1	0.6554344465058749
Q96RR4	Q96RR4	0	0.0
Q13315	Q14191	1	0.8375225898440183
Q04912	Q04912	0	0.0
P19784	P11836	1	0.7037920875420876
P19784	Q13526	1	0.642219559540988
Q02156	Q16625	0	0.211533089925947
Q13188	P05023	0	0.0739386341172055
P06241	P51911	1	0.8960364402678068
O75582	Q16695	1	0.913030990173847
O00141	O00213	1	0.8507086167800452
P17252	P17813	1	0.6824068193711048
P19784	Q13526	1	0.642219559540988
P41279	Q15418	1	0.7560553969062374
P51948	Q8WXH0	0	0.0
Q9Y2U5	Q16512	1	0.7102188552188553
Q16539	Q05655	1	0.9311664261664264
P06239	P06239	0	0.0
Q9NYL2	O96017	1	0.9524763794406652
Q13131	P04626	1	0.9218917920703634
Q6P2M8	P0DMV8	1	0.7705337387480247
P07948	P12318	1	0.8883604559958742
P19784	P18887	1	0.6477788084930943
Q02156	P46940	1	0.6434576336362051
P19784	Q13526	1	0.642219559540988
Q9NYV4	P24928	1	0.696365697794269
Q9BUB5	P45983	1	0.545080144444806
PR:000026196	P06396	0	0.0
P41240	P41240	0	0.0
O00418	Q9Y4G8	0	0.3332055096961929
P19784	P10451	1	0.6311810477881906
P49840	Q2M1Z3	1	0.5428036117321833
O14730	Q9Y4G8	1	0.7190992935635792
O14920	P17655	0	0.0091894282965711
O14757	Q96N67	1	0.610447746123212
Q9UQM7	P51790	1	0.7945508063365205
Q13131	Q9BU19	1	0.7929476389031433
Q92630	O43255	1	0.8374206349206347
P19784	P04818	1	0.6160618944547517
Q9NYV4	P24928	1	0.696365697794269
P11309	O15143	0	0.1159810295524581
P04626	P31146	0	0.0317227019012733
Q86Z02	P17655	1	0.6898377482306054
P12931	P78352	1	0.5862086062086062
Q96RR4	P50570	0	0.2874926396354967
P68400	P16949	1	0.925769262754
P17612	P48730	1	0.882694719301862
P07332	P11274	1	0.7111891613677329
Q8TD19	P26038	1	0.6072323972323972
Q8IWQ3	P30101	0	0.1873184024969739
P27361	Q08499	1	0.9125579777365492
P17252	P29350	1	0.7657004787151847
P17612	P55087	1	0.8993477289905862
Q04759	Q02750	0	0.2447789401956068
P19784	Q13526	1	0.642219559540988
P17252	P07355	0	0.1461183261183261
P06493	Q9Y6W5	1	0.8269362074155308
Q13188	Q13188	0	0.0
Q96BR1	P06748	0	0.4041617971975115
P45984	O43521	1	0.9559066859066858
Q9UQM7	P31645	0	0.0601607056964199
Q15418	Q14451	1	0.8460713856249572
P17252	P22460	1	0.7321173700637986
Q14164	P15311	0	0.3680876729091016
Q8N5S9	P61978	0	0.1173598413724464
P12931	P23743	1	0.8761665252736681
Q99640	P06493	1	0.7675533266230272
P24941	Q9UEY8	1	0.8874311138596853
Q16512	P36871	1	0.8902629182986328
P31751	P51636	0	0.3072790792433649
P05771	P26010	1	0.7981745701388558
Q05513	P30086	1	0.961717515288944
P19784	P35222	1	0.6668419080919081
P28482	P51168	1	0.8664765393336823
Q92630	P61978	0	0.0693817293817293
Q7L7X3	O60566	1	0.9953571428571428
P19784	Q13526	1	0.642219559540988
Q04759	Q86UL8	0	0.0957624716553287
P19784	Q13526	1	0.642219559540988
Q00535	Q02750	1	0.7530127346198778
Q13188	P51955	1	0.7929851662887377
Q05655	P40189	1	0.7986100803957946
Q9HC98	P23443	1	0.63008855562427
P12931	O60496	1	0.7346600899556565
P27361	O60331	1	0.9500480141551568
Q13315	P00749	0	0.1290779987208558
O15111	Q9BUZ4	1	0.638952354960518
P23443	P03372	1	0.8900103071531644
P27361	O00429	1	0.9290578403078404
P78368	Q86UL8	1	0.5708270631484916
Q13976	P04792	1	0.5489162909401004
Q04759	Q92934	1	0.9476807517878946
P49841	P62491	0	0.2852610484753342
P19784	Q99801	1	0.6601568405139834
Q13976	P31146	0	0.0140608465608465
P21127	P31146	0	0.0227677626606198
P17612	O14493	1	0.9332294028722604
Q15418	Q16875	1	0.9700831443688586
P07949	O60716	0	0.0868124835538266
P27361	P14923	0	0.0873990243017336
P17612	Q6J4K2	1	0.7408186456400744
Q8N5S9	P17655	0	0.4423259157464156
O15530	O00213	1	0.8583257747543462
P49840	Q12846	0	0.0613698206555349
Q92630	P61978	0	0.0693817293817293
P48729	Q13144	1	0.8889955927878862
P19784	Q13541	1	0.6526000652786367
Q16539	P35638	1	0.8553964818250533
Q13315	P78527	1	0.9185434274719988
Q92630	Q16555	1	0.7493506133310278
Q99558	Q96N67	0	0.454501219679791
P06493	P39019	0	0.086406351584923
O00418	P05023	0	0.1947187865045007
P27361	P05787	1	0.9768262557548272
P68400	O75496	1	0.9016680409537552
P67870	O95863	0	0.0
P19784	Q92769	1	0.6380744586101726
O00418	P11717	0	0.2299168411276425
Q8TD19	Q8TD19	0	0.0
Q7L7X3	P27348	0	0.2662606507249366
Q9UQM7	P12931	1	0.6837470998500411
P22694	P26038	1	0.7091598018383733
P68400	P01116	1	0.8124887480244624
Q05513	P49841	1	0.9866071428571428
P19784	P18031	1	0.6498689736189734
Q15208	Q15208	0	0.0
Q99558	Q00653	1	0.786426813926814
Q9BYP7	P78352	1	0.7512779019921877
O75914	P04049	1	0.6954140898783755
P78368	Q9Y5P4	1	0.623938142890006
P42345	Q08209	1	0.5101286676286675
P31751	P15311	0	0.0588650106507249
O14920	Q5S007	1	0.7390075929361645
P19784	Q12959	1	0.7112511166082593
P28482	Q14157	1	0.9428751278289093
O14757	Q15654	1	0.793903464260607
P05771	Q9BXL7	1	0.8748448374565138
P41240	Q14118	0	0.2127577911506483
O00418	P05023	0	0.1947187865045007
Q6P5Z2	Q6P5Z2	0	0.0
P48729	P27361	0	0.1441516354016354
Q04759	P63244	1	0.8607416978020316
Q99558	P27361	0	0.3843093943093943
Q13131	P52292	1	0.8136630499130498
P19784	Q13144	1	0.6988045618402763
P24941	P38432	1	0.6944609193716336
P00533	Q14980	1	0.5384276669098099
Q9UEW8	Q9UHW9	1	0.8841668384525528
P19784	P18887	1	0.6477788084930943
P49137	Q14847	1	0.9559900020614304
P06493	Q96C19	1	0.762586693954475
Q9NYV4	P0DMV8	1	0.7472855253212396
Q13535	Q00987	1	0.6805108581894296
Q99640	P35372	0	0.2432488048732288
P17612	Q9Y6E0	1	0.8914680776616866
O00418	O00418	0	0.0
Q92630	P50570	0	0.3028298370547609
O15530	P63000	0	0.0406547619047619
P12931	P37840	1	0.9162048203119634
P19784	Q13547	1	0.6556557067271352
P17612	P29966	1	0.6105979205979204
P19784	Q13526	1	0.642219559540988
O95835	Q9GZV5	1	0.901449357520786
P19784	P52655	1	0.7015948601662886
Q13554	P19022	0	0.2301150899365185
Q13188	P05023	0	0.0739386341172055
Q14680	Q16625	0	0.3210153867296724
P19784	P61978	1	0.6879380275808846
P68400	P08833	1	0.8456624063766921
Q04759	P63244	1	0.8607416978020316
P19784	Q9UNN4	1	0.7253594619666047
Q9BUB5	P06730	1	0.8874384147598434
P19784	P61978	1	0.6879380275808846
P22694	Q14896	1	0.6167475778190064
P17612	Q9UJY1	1	0.8207407407407405
P17612	P36956	1	0.9389606953892669
P17252	P35611	1	0.9724045729402871
O14920	Q9BXH1	1	0.9030463902732808
Q8TD19	Q8TD19	0	0.0
Q15208	Q86UL8	0	0.1046135676492819
P42345	O00418	1	0.8305020739218857
P19784	Q13085	1	0.7253321480107194
P31751	Q92974	0	0.4305006105006106
Q9BWU1	O00303	1	0.665523173916031
O75914	Q9Y4G8	1	0.727047780262066
P19784	O43896	1	0.720487012987013
Q8TD19	Q8TDX7	1	0.646352899745757
P08637	P05023	0	0.0
P19784	P55087	1	0.6558852985638701
P17612	P25098	1	0.8286131725417442
Q13535	P35372	0	0.0142942176870748
P19784	Q13526	1	0.642219559540988
P19784	P28482	1	0.6554344465058749
Q9P286	P15976	1	0.7952723070580214
Q6IQ55	Q7L0J3	1	0.7279562633134062
P27361	P12931	0	0.4941535650779349
P28482	Q86WV6	1	0.8770186030900317
Q9NYV4	P24928	1	0.696365697794269
Q9BUB5	P45983	1	0.545080144444806
P07947	Q16543	1	0.8641125276839562
P31749	O00213	1	0.9511699477770909
P19784	P35372	1	0.7265866474795049
P17252	Q14676	1	0.8417298706584422
P49841	Q14494	1	0.6896636285168439
P31749	P39019	0	0.2465115440115439
O75582	Q86UL8	0	0.0079761904761904
Q38SD2	Q96SN8	1	0.6973980613266324
P17612	P98082	1	0.5571945382659668
Q92630	P01106	1	0.9223143523143524
P06493	Q9Y624	1	0.5542357675393389
Q92630	O43255	1	0.8374206349206347
Q9NYV4	P31146	1	0.6993996083281796
P45983	P31947	1	0.8195284939927797
P31751	P13861	0	0.0888757604829033
P06493	P23396	1	0.789870757549329
P19784	Q01105	1	0.6359060251917393
P68400	P50895	1	0.8148904270332843
Q00535	Q13153	1	0.7906966776609637
Q8IYT8	A2RUS2	1	0.7259778052635194
P51812	Q13418	0	0.1442848553562839
P12931	Q14289	1	0.6439187796330653
P05771	P63328	0	0.170311843665881
P17612	Q96PU5	1	0.9449650415721844
Q13188	Q13188	0	0.0
Q9BYP7	P55011	1	0.7580220440934727
P19784	Q9UNN4	1	0.7253594619666047
Q13177	P05412	1	0.9146958101422386
Q13418	P31749	1	0.8525415721844292
P19784	Q13526	1	0.642219559540988
P19784	Q13526	1	0.642219559540988
Q04759	P63244	1	0.8607416978020316
Q13315	O96017	1	0.9639824263038548
P24941	P05556	1	0.8584033096533097
O14757	P49790	1	0.9613326290112006
P06241	P24666	1	0.5120437234722949
Q13554	Q9NQC7	1	0.7018679997251426
Q04759	P28482	0	0.0625596097024668
Q13131	P50552	1	0.9873300773300772
P17252	P29350	1	0.7657004787151847
Q04759	Q5JVS0	1	0.8838644886859172
P19784	P50281	1	0.6214991093562522
P24941	P29374	1	0.7219972752115609
Q9NQU5	Q14118	0	0.2916841180916811
P27448	Q86UL8	0	0.0703798185941043
Q9HCP0	Q12778	1	0.8265078374006944
P28482	P32004	1	0.8849354085068373
Q7L7X3	Q7KZI7	1	0.9667236303123398
P49841	Q14194	1	0.9501687796330656
P54646	P60953	0	0.19521886670955
Q16816	Q14118	1	0.7514702295059438
P19784	Q9UQE7	1	0.7514432921575778
O75914	P11717	1	0.7452813852813852
P68400	Q92466	1	0.577497310890168
P19784	Q12972	1	0.7050647784366273
P17252	P19021	1	0.8760671074956787
Q9UHD2	Q01094	1	0.711313935417279
P45983	P05129	1	0.8287433862433863
P68400	P31749	1	0.8754278831970215
P24941	Q14676	1	0.9157933931148216
Q8N5S9	P61978	0	0.1173598413724464
P11309	Q9BZS1	1	0.8786533348971772
Q8TDX7	P23443	1	0.6328529341029338
P19784	Q13526	1	0.642219559540988
Q8N5S9	Q16566	1	0.8156455185026613
O14920	P31645	0	0.1798062255205112
Q92630	O15511	0	0.210590170411599
Q00535	P07814	1	0.8684106369820657
Q15418	Q15366	0	0.2937988679297835
Q9UBE8	Q8N122	1	0.8951358826358827
Q9NYV4	P31146	1	0.6993996083281796
Q9NYV4	O60716	1	0.6229462854165235
P06493	O00267	1	0.8855231937374791
Q13315	P16070	0	0.3498618841475985
Q06187	P51813	1	0.8581645537002678
O75914	P19429	1	0.7152388682745827
Q13627	P24928	1	0.961610634592001
P19784	Q9Y5B0	1	0.6552768329554043
P22612	Q8WXH0	0	0.1195387873959302
P27361	Q7L0J3	0	0.0161904761904761
P17252	P62834	0	0.1568711777640349
P25098	P13498	0	0.1211354749747607
Q9HC98	P52948	1	0.7008524015666873
P31751	Q92908	1	0.9273148148148148
P31749	Q6PIY7	1	0.8160471961900532
Q9NYV4	P24928	1	0.696365697794269
P19784	P11021	1	0.6636432218575073
Q13188	Q9H8S9	1	0.909832905190048
Q8TD19	P0DMV8	1	0.6686412529269673
Q04759	P28482	0	0.0625596097024668
P06493	P23396	1	0.789870757549329
P31751	P14923	0	0.1349423658352229
P24941	Q9H6K1	1	0.7225975743832888
P49841	P17275	1	0.968065948601663
Q9NQU5	Q92934	1	0.9300066137566134
Q15382	P15056	0	0.0
P36897	Q12959	0	0.0162106894039667
P19784	Q15599	1	0.6817206074348932
P19784	Q13526	1	0.642219559540988
P49840	P35222	1	0.9863236961451248
Q9HC98	O43707	1	0.6798458221672508
P24941	Q9H7L9	1	0.7529912217412218
Q9BUB5	P23246	1	0.8120809470033075
P19784	Q12959	1	0.7112511166082593
Q9BUB5	P09651	1	0.8407794784580497
P28482	Q8IZP0	1	0.9421723184223184
P41240	P09769	1	0.8634933220104027
Q05513	P60953	0	0.2003862185900001
P17612	Q92597	1	0.8964755020112162
P00519	O15269	1	0.7146795091554404
P06239	Q9BWW4	1	0.8868741509812939
P19784	P17096	1	0.6436277743420602
Q8N5S9	P11912	0	0.1687779152064866
Q96RR4	Q8IU85	1	0.7943564306064305
Q13237	Q8WXH0	0	0.0822252284752284
Q04759	P15311	0	0.4921540914345534
P42336	P23443	0	0.0
P68400	Q92542	0	0.4371164602204518
P17252	O95644	1	0.982497732426304
P53779	P08670	1	0.7718146912751772
Q9HC98	O00141	1	0.6388984230055659
P28482	P42261	0	0.2583694480123052
P06239	Q9Y6W5	1	0.8339420367991798
Q15139	Q9UBF8	1	0.925939959511388
P19784	Q13526	1	0.642219559540988
Q96RR4	P54646	1	0.8287399240970669
Q99558	Q00653	1	0.786426813926814
P17252	P11233	1	0.5186237120548987
P27361	Q96Q27	1	0.9091374630660344
Q13535	Q8WXH0	0	0.0257111935683364
Q04759	Q92934	1	0.9476807517878946
P19784	Q13526	1	0.642219559540988
Q13188	O95835	1	0.9037757678829108
Q16539	O15198	1	0.7929835551159081
P41279	P19022	1	0.5819989864632722
P19784	Q9UD71	1	0.699728320621178
P31751	P27348	0	0.2836990806423581
Q16539	P21462	1	0.7980292723149867
O75914	P04040	1	0.7154110571967713
P19784	P21673	1	0.7824153095581668
P19784	P06748	1	0.6851306431663573
Q683Z8	Q03135	0	0.0
Q8N5S9	Q8IU85	1	0.7862118635332921
P11362	Q9UBW7	1	0.8869320845542648
Q7L7X3	O60566	1	0.9953571428571428
Q16539	P29350	1	0.8690797040609072
P17612	Q7Z2W7	1	0.7160818645640071
Q9NYV4	O00560	1	0.711538210466782
P12931	P42858	0	0.3738345781202924
Q13882	Q9NRY4	1	0.6775055830412975
P48729	Q8TB45	1	0.8962348828420257
P67870	P08473	0	0.0
P19784	P28482	1	0.6554344465058749
Q04759	P28482	0	0.0625596097024668
P06493	P61073	0	0.3336957353636375
P51812	P49840	1	0.6894476224833369
Q9H2X6	P18846	1	0.936885865457294
Q13188	O95835	1	0.9037757678829108
P68400	Q92974	0	0.4136537796936956
P27361	O75582	1	0.9607851473922904
O75914	P04049	1	0.6954140898783755
A9UF07	P05023	0	0.0
Q04759	P63244	1	0.8607416978020316
Q9BUB5	P45983	1	0.545080144444806
Q13188	P51955	1	0.7929851662887377
O75914	P31146	1	0.6858621999693428
P22694	Q14896	1	0.6167475778190064
P22612	Q92934	1	0.9178560857132284
O14757	Q14118	0	0.0691390091390091
Q8TD19	Q8TDX7	1	0.646352899745757
P19784	Q02750	1	0.65166280148423
P19784	P28482	1	0.6554344465058749
Q92630	P31645	0	0.2465762465048179
P43405	P31995	1	0.9350359032501891
P19784	P51636	1	0.6376117467188898
P06493	P16615	1	0.8432707570207569
P19784	Q13526	1	0.642219559540988
P31751	O15511	0	0.0354801539834434
P05771	P14679	1	0.7061546445177397
P12931	O14976	1	0.6879901937070674
Q04759	P63244	1	0.8607416978020316
P49137	O15511	0	0.0552745997388854
P19784	Q9NZU7	1	0.7228628117913835
P19784	Q13526	1	0.642219559540988
Q16816	P04040	1	0.709598965848966
P42345	O75912	0	0.4123949060199061
Q96GD4	P82970	1	0.8120097878634466
P31751	P98177	1	0.9329524245595676
Q13237	P50552	1	0.9281656042370328
P68400	Q96PX8	1	0.7077781609924467
P22694	P0DMV8	1	0.6921955954098812
Q9NYV4	P24928	1	0.696365697794269
O95382	P04040	0	0.3732799938157082
Q13315	Q9Y6K9	1	0.7785457994386568
P19784	P17096	1	0.6436277743420602
Q99640	O75955	0	0.3888420706277847
P42684	P10636	1	0.722930559170055
P78368	Q12959	1	0.7109424173709888
Q86Z02	O60829	1	0.6524041104398246
P28482	Q86WV6	1	0.8770186030900317
P17252	O76090	1	0.8736487850773568
P22612	P28482	0	0.0967801312444169
P31749	Q86V81	1	0.7544186765615337
P28482	P08238	1	0.8843771902700476
P19784	Q13526	1	0.642219559540988
O14757	Q6PD62	1	0.6523506385683437
Q9HC98	P23443	1	0.63008855562427
Q99640	P06493	1	0.7675533266230272
P42684	O14818	1	0.8430521627843055
P17612	P47736	1	0.8441649488078059
P53350	O15143	0	0.0918848141432175
Q9HC98	Q14118	1	0.7171465901823044
P19784	Q13526	1	0.642219559540988
P17252	P01730	1	0.8172167250738681
P49137	Q14451	1	0.7589582837797126
Q9NYL2	Q14155	0	0.3597100518529091
Q15418	P30050	0	0.0685593176664605
Q92630	Q02750	0	0.3890292951339214
P17252	P29350	1	0.7657004787151847
P51955	Q9BV73	1	0.83500764447193
P17252	P25054	1	0.6373534530771375
Q9UQ88	P04040	0	0.0484816704459561
Q99640	P11021	0	0.3726792400720972
P19784	Q01892	1	0.6496344396344393
P24723	P06396	0	0.1081883116883116
Q04759	O15530	1	0.8839380196523055
PR:000029189	P46937	0	0.0
Q9HC98	P0DMV8	1	0.6800992922421495
P68400	Q08945	1	0.8040791417577134
O75914	Q05682	1	0.6378147620943189
Q05655	P61978	0	0.0266115894687323
Q92630	Q14195	1	0.926699460592318
P19784	Q9UNN4	1	0.7253594619666047
P51812	P31431	1	0.6101035241213812
P19784	P49795	1	0.624340428090428
Q8TD19	P27361	1	0.6481243888386744
Q99558	P0DMV8	0	0.2130034185391328
P19784	Q01892	1	0.6496344396344393
Q04759	P61978	0	0.0086580086580086
P68400	P01116	1	0.8124887480244624
P24941	Q6UB35	1	0.6235787916699245
Q05655	Q16236	1	0.7998694559408845
P19784	Q13526	1	0.642219559540988
O00418	Q13418	0	0.2616363165819688
A0A173G4P4	Q06609	0	0.0
Q99640	P06493	1	0.7675533266230272
P06493	O00311	1	0.8046565473696815
P08637	P06239	0	0.0
P53778	P13861	0	0.108502886002886
P19784	Q12959	1	0.7112511166082593
Q13177	P27824	0	0.1200758236472522
P45983	P63104	1	0.7503370056325724
P68400	P13349	1	0.7246364878507735
Q13188	O95835	1	0.9037757678829108
Q9NYV4	Q9NYV4	0	0.0
P42680	O75955	0	0.0372680890538033
P12931	P35790	1	0.831955438741153
Q7L7X3	O60566	1	0.9953571428571428
P24941	P23511	1	0.6799388111888109
P19784	Q01892	1	0.6496344396344393
P19784	Q13526	1	0.642219559540988
P19784	Q13526	1	0.642219559540988
Q96GD4	Q69YH5	1	0.7928969112897682
P19784	Q13526	1	0.642219559540988
P24941	Q96T88	1	0.8960104698445034
P45983	Q8N122	1	0.922065236350951
Q16816	Q16816	0	0.0
Q04759	P63244	1	0.8607416978020316
Q05655	P13498	0	0.0358781689450272
P19784	Q13526	1	0.642219559540988
P17252	P62834	0	0.1568711777640349
P27361	P29353	1	0.9718219809291238
Q9H2X6	O43707	0	0.0081462585034013
P22694	Q14896	1	0.6167475778190064
P19784	Q12972	1	0.7050647784366273
Q04759	P26038	0	0.2913983630802567
Q05655	P05787	1	0.9781494431494432
Q9UQM7	P39019	0	0.1431180988323845
Q13976	P78347	1	0.9243370782656496
P19784	Q05940	1	0.7239927334570194
P43250	P43250	0	0.0
Q13131	O00429	1	0.9378722600151176
Q13555	Q03060	1	0.9245852229780802
P28482	Q9Y4K1	1	0.7550762531119671
P19784	Q6FHW4	1	0.6213007627293342
Q92630	Q86UL8	0	0.1681390434961863
P53778	O00418	1	0.932494674637532
Q9NYV4	P13498	1	0.7196262798048515
Q15569	Q15569	0	0.0
Q6P5Z2	Q6P5Z2	0	0.0
P68400	P01116	1	0.8124887480244624
Q04759	P63244	1	0.8607416978020316
Q13233	Q13158	1	0.789059214594929
Q8TD19	Q8TD19	0	0.0
Q05655	Q96C90	1	0.9519684085755517
P78527	P14859	1	0.8275188587478505
Q9NYV4	P24928	1	0.696365697794269
P68400	Q16625	0	0.2881533960633339
P19784	P84090	1	0.737391576677291
P31751	Q9Y3M2	1	0.9085147458361744
Q13131	P07355	0	0.266891946677661
P17612	Q14254	1	0.712503220985364
Q13188	Q14511	0	0.3260478443514158
P24941	O15014	1	0.6786066777138205
P11309	O14974	1	0.8328237635380492
O15111	Q9Y6Q9	1	0.955870181405896
P19784	P09497	1	0.6900005153576583
P19784	Q13526	1	0.642219559540988
P53355	Q9ULV4	1	0.7602110045645514
Q15418	Q14511	0	0.1790298544725558
Q04759	P28482	0	0.0625596097024668
Q96BR1	P49841	1	0.9149541331684188
Q07912	Q96SB3	0	0.494483928769643
Q13882	Q15366	0	0.3533567226424368
P19784	Q13526	1	0.642219559540988
Q16816	P10636	1	0.7549191747406032
Q04759	O14920	1	0.9204657974300832
P19784	Q9Y5B0	1	0.6552768329554043
Q14164	P49840	1	0.833723802652374
P27361	Q07889	1	0.8742862957148672
P19784	Q13526	1	0.642219559540988
P06493	P39019	0	0.086406351584923
P06493	P39019	0	0.086406351584923
P19784	Q13526	1	0.642219559540988
P00519	Q13177	1	0.5766603171960316
P19784	P24534	1	0.6554278327492614
P19784	Q13526	1	0.642219559540988
Q9NYV4	O60716	1	0.6229462854165235
P78527	Q96QB1	1	0.580410920389912
P19784	P55087	1	0.6558852985638701
Q8TD19	Q8TD19	0	0.0
P31749	Q9UN36	1	0.9175653645296504
Q96GD4	P60953	0	0.1756405895691609
P12931	P30556	1	0.8155683953535919
P19784	Q13526	1	0.642219559540988
P41743	Q7KZI7	1	0.9744236583522298
Q13315	P16104	1	0.9289222153507868
Q9HC98	Q08345	1	0.6360571703428847
P24723	P04040	0	0.1131364667078952
P19784	P04083	1	0.6664867209510067
Q96GD4	Q8IX90	1	0.6677965024393594
P19784	Q13526	1	0.642219559540988
Q04759	P63244	1	0.8607416978020316
Q13153	P78545	1	0.7363227963425008
P27361	P14923	0	0.0873990243017336
O14757	P67870	1	0.8220813577956434
Q9Y3S1	Q9UEW8	1	0.6344744210815639
P24941	P05556	1	0.8584033096533097
P51813	Q8TDY4	0	0.4049592227599746
P68400	Q16832	1	0.7575552124670681
P51812	P04637	1	0.963812358276644
P00533	O00161	1	0.6839990564990567
P19784	P55957	1	0.6991347012775582
P28482	O60331	1	0.9226311585240156
P17612	P39019	0	0.0999854920212063
Q13976	Q13418	0	0.1737411959733388
P68400	P28482	0	0.0
Q04759	P61978	0	0.0086580086580086
P42345	Q14289	1	0.5118473127401697
Q8IYT8	P0DMV8	0	0.1993245975734454
P49841	Q9UQB3	0	0.4064681185216899
Q9Y3S1	P13861	1	0.5955679241393526
P48729	Q03060	1	0.9388142479213908
P19784	P11021	1	0.6636432218575073
P49840	P14923	0	0.1910746066103208
P17252	Q03721	1	0.9224957251742966
P19784	Q9UNN4	1	0.7253594619666047
P31751	P61073	0	0.3880240923098063
P50613	O60674	0	0.2254503123582071
P19784	P17655	1	0.6858560817489388
P12931	P42858	0	0.3738345781202924
Q13976	P62280	0	0.0164772727272727
P19784	Q13526	1	0.642219559540988
Q9BUB5	O43597	1	0.6476750683179255
Q05655	P17655	0	0.0314543393114821
P42684	P04040	0	0.0959585996014567
P68400	P01116	1	0.8124887480244624
Q04759	P29474	1	0.9294586167800456
O14757	Q14118	0	0.0691390091390091
Q92630	Q14194	1	0.8859482382696667
P49137	Q13151	1	0.682786782173428
O14757	Q9HB96	1	0.7059794702651846
P06493	Q99638	1	0.9543386243386244
Q9HC98	Q03135	1	0.656329834186977
O96013	P49023	1	0.9549984737484736
P19784	P52655	1	0.7015948601662886
P12931	P11511	1	0.7993812589526876
P17252	Q92837	1	0.9127933244004672
Q15208	P27348	0	0.4616958702672989
P28482	P41743	0	0.3176095485886127
O14757	Q13418	0	0.0267063492063492
P24941	P07947	1	0.6985412982397261
Q9NYV4	P24928	1	0.696365697794269
P28482	Q9P2Y5	1	0.7983525469239755
Q04759	Q9UEW8	1	0.8763601102322907
P31749	P47870	1	0.74070788285074
P19784	Q8WXH0	1	0.7676248024462312
P17252	Q14289	0	0.3833488006702293
Q16539	O43521	1	0.8975155466226893
Q14680	Q86UL8	0	0.1834060978703836
P19784	P67870	1	0.6791828145399573
Q16539	Q9UL54	1	0.8067680528394814
Q14680	P61978	0	0.0478996598639455
Q13188	P13498	0	0.122664491593063
Q86Y07	Q9UHP3	1	0.7728501855287572
P06241	Q16625	0	0.2064811346061345
Q13976	Q03393	1	0.7647842369270942
P07947	O00560	0	0.0671895829038686
Q15831	Q9H093	1	0.7646906202263344
P78527	P52945	1	0.8864361300075585
P24941	Q92542	0	0.3588941840826508
Q13315	Q15831	1	0.9182140676783532
Q13315	P00749	0	0.1290779987208558
Q9NYV4	Q8TEW0	1	0.7573116367759222
P49841	Q9Y624	1	0.5243801636816342
O75116	Q02750	1	0.5011981536981539
Q9UQM7	O00631	1	0.7583785989143134
Q04759	Q9UEW8	1	0.8763601102322907
Q16539	Q05209	0	0.3066478957550387
Q13188	P62745	0	0.0430428993302747
Q9BUB5	P09651	1	0.8407794784580497
Q14164	P15311	0	0.3680876729091016
P43250	P04040	0	0.0604213907785336
P53350	P35241	0	0.3685200645914932
Q96GD4	P26038	0	0.2326747921390779
P19784	Q16623	1	0.6803862605648318
Q13188	Q9H4B6	1	0.8977029914529916
Q04759	Q3V6T2	1	0.8686701525987239
P24941	P05556	1	0.8584033096533097
Q9HC98	P46783	1	0.6788325629397056
Q9P1W9	O00161	1	0.5981848838991695
O75914	Q05682	1	0.6378147620943189
P07948	Q13873	1	0.6797437057123069
Q04759	Q3V6T2	1	0.8686701525987239
P05771	P20700	1	0.849625830518688
P17612	O14786	0	0.4865741863956151
Q96RR4	Q14012	1	0.7898148148148145
Q6IQ55	Q7L0J3	1	0.7279562633134062
P19784	P13861	1	0.6529849713778287
Q9BUB5	O43597	1	0.6476750683179255
Q8N5S9	P19022	1	0.5413868538868538
P12931	Q08209	0	0.4802433347076201
P49137	Q96J92	1	0.9208749055177626
O14757	Q14118	0	0.0691390091390091
P53778	P13861	0	0.108502886002886
P68400	O14950	1	0.9690901360544218
Q9BUB5	P04792	1	0.6997695492338349
Q13237	Q86UL8	0	0.0380002203310473
Q04759	P01116	1	0.7827027932385078
P12931	P35916	1	0.811921339242768
P07948	P52799	1	0.6063915779987208
Q13555	P0DMV8	0	0.110690630970134
P27361	P14923	0	0.0873990243017336
P00519	Q15139	1	0.8863094445237303
P05129	P28482	0	0.0243758159829588
Q15746	P21333	0	0.4835495484129938
Q13555	P26038	0	0.2902306159449015
Q9UQM7	Q15121	1	0.8554044885411345
O14965	P53671	1	0.8390630533487681
Q00535	O60331	1	0.8893089053803339
P28482	P49841	1	0.9808531746031746
P28482	Q9P2Y5	1	0.7983525469239755
P43405	Q92918	1	0.8948767436267434
P31749	P29475	1	0.8948975640761356
Q9NQU5	P62834	0	0.1487419392776535
Q13464	Q16555	1	0.8892454304954305
Q96QT4	P13861	0	0.0803155706727135
Q13535	Q8WXH0	0	0.0257111935683364
P19784	Q13085	1	0.7253321480107194
P19784	Q01892	1	0.6496344396344393
Q04759	Q9BXL7	1	0.8925821995464851
Q9HC98	P11717	1	0.6962103174603175
P50613	P04083	0	0.1911898795577751
P19784	Q13526	1	0.642219559540988
P05771	P13498	0	0.1219355974713117
Q99558	P41743	0	0.4732481890486817
Q13315	P00749	0	0.1290779987208558
P06239	Q08881	1	0.9298469387755102
P19784	P15311	1	0.6632896997182709
Q92630	P17655	0	0.219852434757897
Q9NQU5	P18206	0	0.080245534888392
P19784	P24534	1	0.6554278327492614
Q86Z02	Q9UER7	1	0.7225130094772951
PR:000026457	Q8TDY4	0	0.0
Q14012	P46527	1	0.7917068480461337
P17612	P04049	1	0.9884637188208616
Q13976	O76074	1	0.8292085758157186
Q96RR4	Q96RR4	0	0.0
Q9UQ88	O95238	1	0.5791375225303798
Q9Y3S1	Q12959	1	0.7415879028379029
P27361	P17655	0	0.0004761904761904
Q13131	P08670	1	0.7399270306413163
Q13188	Q03135	0	0.1544048839933933
Q05655	P54764	1	0.5473236419664992
Q9NYV4	O00560	1	0.711538210466782
P17252	Q05940	1	0.7861757026042742
Q96RR4	Q96EB6	1	0.695073524359239
Q15349	P05023	0	0.1055838407624121
Q04759	P63244	1	0.8607416978020316
P17252	Q15139	1	0.9007235885807312
P49840	P20749	1	0.8856750326393186
Q13315	O14757	1	0.9590394129679845
Q9BUB5	P09651	1	0.8407794784580497
O14757	P32004	1	0.8830571016285301
Q9Y243	P04792	0	0.4733964382178667
P19784	Q13526	1	0.642219559540988
P54646	Q13177	0	0.3741855432926861
O14965	O60674	0	0.2135254758469044
P28482	Q13501	1	0.9263473167044596
P68400	Q13422	1	0.946960592317735
Q13315	Q6UWZ7	1	0.8229157591890514
P51449	Q96RL1	0	0.0
P05771	Q8TEW0	0	0.0346721796721796
P19784	Q13526	1	0.642219559540988
P31749	P05455	1	0.8121970291245674
P19784	Q13526	1	0.642219559540988
P17252	P62834	0	0.1568711777640349
Q8TD19	P0DMV8	1	0.6686412529269673
P28482	P35658	1	0.8787575585789872
Q7L7X3	P61073	0	0.3086250135749355
Q9BWU1	P31645	1	0.7130414691128977
P42345	Q14289	1	0.5118473127401697
O00418	P13639	1	0.7812259598866742
P12931	P41743	1	0.6088188815836598
Q13188	P13498	0	0.122664491593063
Q96RR4	P27348	1	0.5776388029959458
O00418	O00418	0	0.0
P49841	Q09470	1	0.8850063747501633
P19784	P18031	1	0.6498689736189734
P19784	P17655	1	0.6858560817489388
P00519	Q9UPY6	1	0.811163814044249
Q8N5S9	P31749	1	0.8188553906411047
O14965	Q02224	1	0.907211320425606
Q9NQU5	O00560	0	0.1645306972827981
P28482	Q6NZI2	0	0.4681267674124816
P24941	O75179	1	0.8518484227412797
Q05655	P17655	0	0.0314543393114821
P11802	P28749	1	0.6420073559801609
P17612	P39019	0	0.0999854920212063
Q8TD19	P04040	1	0.7293589347160776
P49841	Q15910	1	0.9617100426028996
Q15418	P22736	1	0.8872570022570024
P21127	O00303	1	0.8433366056449682
P28482	Q07889	1	0.8588184632827491
Q9BUB5	Q9BR76	0	0.4364983561412131
P31751	P14923	0	0.1349423658352229
Q13535	O00203	0	0.3030098472955616
P00533	O14828	1	0.7392168180910419
P19784	P51946	1	0.6398855047069332
P31749	Q92793	1	0.7366555071912215
Q92630	O43255	1	0.8374206349206347
Q04759	P41594	1	0.9119472789115646
P19784	Q13526	1	0.642219559540988
P19784	Q13144	1	0.6988045618402763
P11309	Q9UNQ0	1	0.6507565912923056
Q96RR4	Q02750	0	0.2262249102192711
P41743	P15311	0	0.4448991616848761
P19784	P04792	1	0.6495364556078842
Q8TAI7	P31749	0	0.0
Q99558	Q00653	1	0.786426813926814
Q9UEE5	P04637	1	0.728564814814815
Q04759	P63244	1	0.8607416978020316
P17612	Q14254	1	0.712503220985364
P68400	O95819	1	0.6060520167663025
P19784	P21673	1	0.7824153095581668
Q7KZI7	O15511	0	0.034249037999038
Q00535	Q14254	1	0.7691039449968022
P19784	P13861	1	0.6529849713778287
P06241	P12931	0	0.3508642547928261
P19784	P42768	1	0.7217619087261945
P49841	Q96R06	1	0.8799343645772216
P45983	Q16621	1	0.7088907917479347
P19784	Q8WXH0	1	0.7676248024462312
Q13315	P00749	0	0.1290779987208558
Q13315	P62917	1	0.7388702501202499
Q9BYP7	Q9UHW9	1	0.7789996962434848
Q13188	P18754	1	0.6399124519660233
P19784	P04792	1	0.6495364556078842
P19784	Q9Y5B0	1	0.6552768329554043
P45983	Q9NPI6	1	0.8972143653268845
P19784	P11021	1	0.6636432218575073
P19784	Q8WXH0	1	0.7676248024462312
P49841	P36956	1	0.9207180650037794
P36888	P36888	0	0.0
P19784	O15511	1	0.7201066790352505
P06493	P23396	1	0.789870757549329
P19784	Q13526	1	0.642219559540988
P19784	P61978	1	0.6879380275808846
P00519	P00519	0	0.0
Q13464	P41743	0	0.3119245123772606
P42345	P62258	1	0.6438047643299744
Q9Y6K9	P25963	0	0.0
P48729	P31146	0	0.0048412698412698
Q92630	O43255	1	0.8374206349206347
P19784	P18887	1	0.6477788084930943
P22694	P13498	1	0.7334020476877617
P19784	Q13526	1	0.642219559540988
P19784	P17096	1	0.6436277743420602
Q9BYP7	Q9UHW9	1	0.7789996962434848
P19784	Q14005	1	0.812540283790284
Q96RG2	P68104	1	0.8401573129251704
Q6IQ55	Q7L0J3	1	0.7279562633134062
Q13233	O75955	0	0.4873872467920085
P19784	P52655	1	0.7015948601662886
P19784	Q13526	1	0.642219559540988
Q9NQU5	P53667	1	0.8762798048512334
P24941	P10721	1	0.7935219827513059
Q9NYV4	Q14118	1	0.7234113241256097
P19784	Q13526	1	0.642219559540988
P19784	Q13526	1	0.642219559540988
P31751	Q9UBK2	1	0.7632290037227012
Q13188	Q9Y4G8	0	0.308105143533715
P11802	Q08999	1	0.9457014215942792
Q04759	P19022	0	0.2244782532282532
Q04759	P11021	0	0.1510504706933279
Q16512	Q6UVK1	0	0.0877713714856572
O14757	Q9Y4G8	0	0.2026515944373087
O15111	Q02750	0	0.3729089363017935
Q15418	P30050	0	0.0685593176664605
Q92630	Q9Y2V2	1	0.8955479670139139
P17612	Q14254	1	0.712503220985364
Q92630	Q9UHD2	1	0.7938287638287639
P57059	Q03135	0	0.2716397821754964
P78527	P15927	1	0.8478069339891997
P06493	O60610	1	0.8405527210884356
Q05655	O15511	0	0.044036701602491
P78527	Q00839	1	0.7841047378547378
P27361	Q96QB1	0	0.48636371564943
Q02156	O75689	1	0.8847088922981781
Q99558	O14920	1	0.8836549165120595
Q9NYV4	Q9NYV4	0	0.0
Q96RR4	P61978	0	0.0497880690737833
P17252	P10275	1	0.9631972789115646
P19784	Q13547	1	0.6556557067271352
Q8IW41	P13498	0	0.2162658043015186
P17252	Q9NRD5	1	0.8062204924704928
P78368	Q14457	1	0.6931757003876822
P19784	Q13526	1	0.642219559540988
P19784	Q13526	1	0.642219559540988
P43405	P51587	1	0.9793434343434342
O00418	O00418	0	0.0
P27361	Q86UC2	1	0.8437741359169928
Q8TD19	Q14118	1	0.646548900834615
Q5S007	P78352	1	0.7228762176976464
P19784	P35372	1	0.7265866474795049
P43405	P37840	1	0.9536092214663644
P31749	Q09470	1	0.8673027039098465
P23443	Q13418	0	0.1004366625438053
Q04759	Q02750	0	0.2447789401956068
P68400	Q92681	1	0.9298185941043084
P19784	P11836	1	0.7037920875420876
P06241	P05067	1	0.9105309901738476
P31751	P04792	0	0.1225698094894523
Q8N5S9	Q16566	1	0.8156455185026613
P00533	Q14980	1	0.5384276669098099
Q04759	P04083	0	0.2472054730983303
Q13976	P31146	0	0.0140608465608465
P19784	P52655	1	0.7015948601662886
P08922	Q06124	1	0.8718782967371007
Q9UKI8	O60716	0	0.1102386727940914
O14965	O60674	0	0.2135254758469044
P10398	Q15599	0	0.3878620387548959
P51449	Q12959	0	0.0
P19784	Q03135	1	0.6459145021645021
Q9Y5P4	Q14118	1	0.6876096852882566
P49137	Q9Y4G8	0	0.266665378272521
Q9Y243	O75955	0	0.0924933862433862
Q96GD4	Q9BXS6	1	0.9708700955129528
Q04759	P63244	1	0.8607416978020316
A0A173G4P4	O00560	0	0.0
P27448	P28482	0	0.0689323507180649
Q6IQ55	P61978	1	0.6620732376089519
Q9HC98	P40763	1	0.6614180065965781
P17612	Q96CW1	1	0.7151755298078826
Q13188	P05023	0	0.0739386341172055
Q13188	O95835	1	0.9037757678829108
O75914	Q9UM54	1	0.655007215007215
P19784	Q13526	1	0.642219559540988
P12931	Q05193	0	0.3583257320799335
P42345	Q8TB45	1	0.882717636199779
P53779	P13498	0	0.1996342083842084
P24941	P49459	1	0.7588816738816738
Q8IW41	P31152	1	0.8792855424998282
P19784	P28482	1	0.6554344465058749
P19784	P09497	1	0.6900005153576583
Q04759	P63244	1	0.8607416978020316
O00418	O00418	0	0.0
P06493	Q02952	1	0.9180707586064728
Q13188	Q9H8S9	1	0.909832905190048
P27361	Q13586	1	0.9607766439909295
Q9NYV4	P24928	1	0.696365697794269
P19784	Q9NZU7	1	0.7228628117913835
Q15569	P04040	1	0.648414145378431
P49137	P63104	1	0.890793399721971
O14965	O60674	0	0.2135254758469044
Q9UQM7	Q96PH1	1	0.8934727706156278
Q9H4B4	Q02750	0	0.3799813549870758
P19784	Q13526	1	0.642219559540988
P48730	P43629	1	0.9902966742252456
P27448	P30307	1	0.991530612244898
P17252	P29350	1	0.7657004787151847
P43403	P08473	0	0.2838713082217223
Q13188	Q8TEW0	0	0.296246711582846
O00418	P13639	1	0.7812259598866742
P19784	P11021	1	0.6636432218575073
P19784	Q13526	1	0.642219559540988
P22612	P13861	0	0.0915305607091321
Q9UQM7	Q96CW1	1	0.7122351566889381
P19784	Q13526	1	0.642219559540988
P22612	Q92934	1	0.9178560857132284
P31749	Q15910	1	0.9564956538170823
P06493	P06702	1	0.5576873325087611
Q02156	Q13153	1	0.7384325330753901
O00418	Q13418	0	0.2616363165819688
Q9BYP7	Q8TEW0	1	0.7330817396888825
P06241	Q8WX93	1	0.553355903355903
P19784	P28482	1	0.6554344465058749
P28482	Q04637	1	0.8736310382738953
Q8N5S9	Q14012	1	0.7556375136732281
P17252	P53004	1	0.874505203790918
Q13237	Q12778	1	0.9778342953342956
P17252	O60500	1	0.7990964921322062
P19784	Q13526	1	0.642219559540988
O15530	Q9HBY8	1	0.9052702191987906
Q13153	P54764	0	0.3903555075876505
Q92630	Q9Y2V2	1	0.8955479670139139
O15111	P31645	0	0.1664326589221547
P17612	O14649	1	0.9076697046339904
P53779	P16949	1	0.8484552154195013
P19784	Q13526	1	0.642219559540988
P17612	P98082	1	0.5571945382659668
P53350	Q9Y266	1	0.7191593426414856
P68400	Q9UJY5	1	0.7825917270560128
P68400	P07910	1	0.9042184601113172
P28482	P06239	1	0.9219869614512471
P53350	Q9NS56	1	0.6380023143408237
P43250	P07550	1	0.9062877928949356
Q8TD19	Q8TD19	0	0.0
P42345	Q9H1K1	1	0.677937171955029
Q02156	P12814	0	0.4986108570555574
Q9NYV4	P31146	1	0.6993996083281796
Q04759	Q86UL8	0	0.0957624716553287
P06493	Q9UHD8	1	0.8324439119081974
Q16539	P17661	0	0.1763804978090692
Q04759	Q8WXH0	0	0.0660206790563933
P19784	Q9UD71	1	0.699728320621178
P42345	Q14289	1	0.5118473127401697
P06241	P14923	0	0.0050396825396825
Q9UHD2	O14920	1	0.9517025699168558
Q9NYV4	P25054	1	0.715410482374768
Q9HC98	P14859	1	0.7216473341473344
Q04759	P63244	1	0.8607416978020316
Q92630	P10070	1	0.8137182358557646
P19784	Q13526	1	0.642219559540988
Q13188	P51955	1	0.7929851662887377
Q04759	P35372	0	0.0515153853775116
Q04759	P63244	1	0.8607416978020316
P78527	P61978	0	0.1970534425891569
P68400	P01116	1	0.8124887480244624
P51617	Q9H4G4	1	0.6719972884258598
P06493	P68400	1	0.8545860408366407
P17612	Q86V87	1	0.7135237489466814
Q9NWZ3	Q9NWZ3	0	0.0
P27361	P63000	0	0.0277645502645502
Q04759	Q13191	1	0.7563262729334159
Q9BYP7	Q13621	1	0.6875621005978149
P49841	P39019	0	0.1512476214261928
Q9HC98	O00141	1	0.6388984230055659
Q96GD4	Q8IX03	1	0.943982426303855
Q04759	P35241	1	0.5004330986473846
Q99640	P06493	1	0.7675533266230272
Q13188	Q7L9L4	1	0.8591471623614482
P28482	Q14686	1	0.8793391727320299
O14757	Q04837	1	0.7364363856203751
Q13315	O75150	1	0.711933106575964
P06493	Q9Y2I6	1	0.7923026180169039
O00418	P31146	0	0.0388176536764576
P19784	Q8WXH0	1	0.7676248024462312
P41743	Q12846	0	0.1122558191162842
Q9Y243	O60674	0	0.3363200887458406
Q13131	P62258	0	0.4428809959881386
P27448	P30307	1	0.991530612244898
P68400	Q15672	1	0.8695966037930325
P28482	Q96RK0	1	0.9408398611970042
Q9BYP7	P18206	1	0.7293709068709069
Q9BUB5	P09651	1	0.8407794784580497
P19784	Q13526	1	0.642219559540988
P07949	Q8N4X5	1	0.6844155844155847
Q15831	Q8TDC3	1	0.8030793941508229
P45985	P61764	0	0.3021731839588983
O14757	O43294	1	0.8768351291565578
Q92630	P28482	0	0.1981650690579262
Q13188	Q13418	0	0.119745756888614
P47710	Q9Y4G8	0	0.0
P19784	O00161	1	0.6898115508829794
Q96GD4	Q6NZI2	0	0.4512909775409773
Q9BUB5	P0DMV8	0	0.1949870565941994
Q9UQM7	P35367	1	0.8599365453252008
P24941	Q8N3F8	1	0.6639993472136331
P19784	P55957	1	0.6991347012775582
P19784	P17096	1	0.6436277743420602
P24941	P10721	1	0.7935219827513059
P22694	O43707	1	0.6764478973407542
Q04759	P63244	1	0.8607416978020316
P68400	P21673	1	0.6898041211434067
Q13188	P18206	0	0.1080363155363155
Q8TDX7	P31645	1	0.6659528104170961
Q13131	P62258	0	0.4428809959881386
Q9HC98	P50613	1	0.6325724077509792
Q13188	Q9H4B6	1	0.8977029914529916
P19784	Q13526	1	0.642219559540988
Q9H4A3	Q8N9I0	1	0.7554318300746872
O43683	O43684	1	0.941382238774456
Q13315	P19022	0	0.0613773858416715
P06493	Q9Y2J4	1	0.8589888088102372
Q92630	Q14195	1	0.926699460592318
P17252	P38936	1	0.8584699691842549
Q15418	P11831	1	0.9778264790764792
P43405	Q9GZY6	1	0.8931480031391517
Q13188	P06396	0	0.0895953447833147
Q00535	Q9UM54	1	0.721397132409037
P28482	P14672	1	0.8084289189646331
O14757	P25054	0	0.4633204758204759
Q9HBH9	P13861	0	0.1169699031127603
Q13535	P07947	1	0.577616848759706
Q8N4C8	Q8IY63	1	0.8968625884697313
Q9NQU5	P46109	1	0.6497564805149282
P19784	P61978	1	0.6879380275808846
Q99558	P61160	0	0.4677787226001509
Q04759	P63244	1	0.8607416978020316
P17252	P41743	0	0.3674506862868932
Q9NYV4	O00560	1	0.711538210466782
P22694	P22694	0	0.0
Q00535	P51809	0	0.4535948707377278
P28482	Q13563	1	0.7828785301999589
P17252	P62258	0	0.4589516832373973
P12931	P17600	1	0.9761551741908884
Q05655	Q9Y698	1	0.7607574304002876
Q13188	Q7L9L4	1	0.8591471623614482
Q13535	P40692	1	0.782430302371125
P19784	Q13526	1	0.642219559540988
P24941	P51649	1	0.7400636294922006
P19784	Q86UL8	1	0.6339341544698686
Q9BUB5	P62280	0	0.1824925603497031
P06493	P23396	1	0.789870757549329
P24941	P33151	1	0.9047886174671887
Q92630	P31645	0	0.2465762465048179
O75582	P04083	0	0.1171433679798341
P19784	P11021	1	0.6636432218575073
Q04759	P63244	1	0.8607416978020316
P28482	P17535	1	0.9290221088435372
P04626	P04626	0	0.0
P45984	Q14653	1	0.7583172713529859
P43403	O43561	1	0.8561778499278498
P11802	O15294	1	0.9513447399161684
Q9BUB5	P04792	1	0.6997695492338349
Q04759	P28482	0	0.0625596097024668
P24941	Q14195	1	0.9276718717790148
P17252	P29350	1	0.7657004787151847
P17252	P11233	1	0.5186237120548987
P24941	P10244	1	0.9303607503607504
P78527	P61978	0	0.1970534425891569
Q05655	O14939	1	0.9436440081082936
Q04759	P63244	1	0.8607416978020316
P45983	Q96SB3	0	0.4328107363938108
Q04759	Q15052	1	0.782430254930255
P19784	Q13526	1	0.642219559540988
P17252	Q14994	1	0.6920759287692785
Q13188	P51955	1	0.7929851662887377
P17612	Q92597	1	0.8964755020112162
P17612	P16615	1	0.8722284461570178
P17252	P04049	1	0.9850859788359788
Q13555	P35270	1	0.8820598845598844
P19784	P21980	1	0.6675445123659411
P48730	P35372	0	0.0356445406445406
Q96KB5	P61978	0	0.0785490435490435
Q14680	Q13485	1	0.7709239173524887
Q7L7X3	Q9P0L2	1	0.856329370034727
P24941	P24928	1	0.9351670617742048
Q9Y6K9	Q13418	0	0.0
Q04759	Q5JVS0	1	0.8838644886859172
P06241	P12931	0	0.3508642547928261
Q15418	Q15831	1	0.934467120181406
Q04759	P63244	1	0.8607416978020316
Q99558	P61160	0	0.4677787226001509
O00418	O00418	0	0.0
P19784	P61978	1	0.6879380275808846
Q86Z02	P04083	1	0.6296749811035525
Q9Y3S1	Q9UEW8	1	0.6344744210815639
Q9Y5P4	Q01955	1	0.7215639915639913
P78527	P61978	0	0.1970534425891569
Q14164	Q12959	0	0.0404135472859835
Q96GD4	P05204	1	0.860252122216408
P07948	P00519	1	0.8555702828917116
Q15418	P50552	1	0.9807277312634456
P28482	P61978	0	0.1048916889988318
P68400	P01116	1	0.8124887480244624
O14757	P36507	1	0.9441338423481282
P19784	Q13526	1	0.642219559540988
P17252	Q02241	1	0.9391912320483748
P19784	Q13526	1	0.642219559540988
P21127	O00303	1	0.8433366056449682
P06493	O60331	1	0.9482200405414692
P06241	P20963	1	0.9167280801209372
Q15418	Q8N122	1	0.9296673366316224
Q04759	P15407	1	0.7969340513983371
P17612	Q13177	0	0.3843833547404977
P19784	Q02750	1	0.65166280148423
P31749	P29401	1	0.6716269841269842
Q99558	O15111	1	0.7746486711665284
P00519	P22681	1	0.827997148354291
P17252	O75469	1	0.8967367177517553
Q9BUB5	P13498	0	0.2397861265718408
P12931	P06396	0	0.3520061706061432
Q15139	Q12959	0	0.0981078043132806
P24941	Q86U86	1	0.9300434618291764
P68400	P07947	1	0.748591450195305
P51812	Q14118	0	0.2513457276850133
P06239	P15311	1	0.7076976660905232
Q04759	Q86UL8	0	0.0957624716553287
O75914	Q03135	1	0.732593193843194
P19784	Q92769	1	0.6380744586101726
Q8IV63	O75531	1	0.7527927638359969
P19784	Q13526	1	0.642219559540988
P31749	Q9H4X1	1	0.8363057445200304
P17252	Q13393	0	0.1260359448752305
P17612	Q13972	1	0.8224489597703885
Q13188	P62258	1	0.5133156922442634
Q2M2I8	P51809	0	0.4820973239723241
P31749	Q9Y698	1	0.8800536830893977
P49137	P49815	1	0.8563164547093118
Q13188	Q7L9L4	1	0.8591471623614482
Q13188	Q9H492	1	0.8675962265247977
P43405	Q8WXH0	0	0.01178983714698
Q13188	P00523	1	0.6739285383928241
P24723	Q9BZL6	1	0.7816680409537554
P17612	P23409	1	0.8364071499009388
Q9NYV4	P24928	1	0.696365697794269
P19784	Q13526	1	0.642219559540988
P19784	Q13526	1	0.642219559540988
Q04759	P15407	1	0.7969340513983371
P22612	Q8WXH0	0	0.1195387873959302
O75914	Q16659	1	0.7230181062323918
Q9BUB5	P04792	1	0.6997695492338349
P06493	Q01196	1	0.9563236961451248
P47710	Q04206	0	0.0
P27361	P09497	1	0.8689559712773999
Q13188	Q9H4B6	1	0.8977029914529916
P25098	P15311	0	0.4411380569543835
Q9HBH9	P23246	1	0.81784487801965
P19784	Q13526	1	0.642219559540988
P19784	P07910	1	0.6223065690922834
O75914	O75914	0	0.0
Q8TAI7	P04083	0	0.0
Q92630	P13807	1	0.9521300590943448
P27448	Q8WUI4	1	0.95497230710466
P28482	Q9BZI1	1	0.901450692164978
P19784	Q13526	1	0.642219559540988
P19784	Q13526	1	0.642219559540988
O14757	P61587	1	0.8738415090200805
P53350	O96017	1	0.9720804988662132
Q92630	Q9Y2V2	1	0.8955479670139139
Q02156	P08631	0	0.3013948221091079
P50613	P03372	1	0.8853050058407204
P19784	P61978	1	0.6879380275808846
Q13535	O75717	1	0.7767149385006529
P19784	P28482	1	0.6554344465058749
Q9BUB5	O14974	1	0.8005406366120654
P17612	P39019	0	0.0999854920212063
P06493	Q14790	1	0.8669840410911841
P24941	P57740	1	0.7056339758125468
P25098	P35241	0	0.4264275671418527
P19784	O75955	1	0.6045773208273209
P06493	P23396	1	0.789870757549329
P19784	P52655	1	0.7015948601662886
Q13188	P04040	0	0.0281232895457033
P24941	Q8IXM2	1	0.6281509051021247
Q9HC98	O43707	1	0.6798458221672508
Q8N5S9	Q02750	1	0.5366528704028704
P19784	P17096	1	0.6436277743420602
P19784	Q13526	1	0.642219559540988
Q16539	Q8IW41	1	0.7321591966234823
Q9P286	P05023	1	0.6873912397126681
P19784	Q8WXH0	1	0.7676248024462312
Q13131	Q04759	1	0.881617192119807
O75914	Q14118	1	0.7080301312444168
Q99558	O00560	0	0.2457908326500763
Q9HC98	P52948	1	0.7008524015666873
P17612	Q6PIY7	1	0.8655973722045147
P68400	O75822	1	0.6664061368525652
Q16539	P41743	0	0.2917442445121017
Q9BYP7	Q13621	1	0.6875621005978149
Q04759	P63244	1	0.8607416978020316
P08922	Q86UL8	0	0.0222714388785817
Q92630	P17655	0	0.219852434757897
Q04759	O15111	1	0.8120698481412767
P17612	P39019	0	0.0999854920212063
P19784	P60484	1	0.6425501614787328
Q6IQ55	P17655	1	0.6579290286433144
P27448	P41236	1	0.9315805160448014
P24941	Q14161	0	0.1578179756751185
P42345	P27824	0	0.244641502677217
O14757	Q14847	1	0.9641960420531848
P31749	P38936	1	0.8981613756613757
P28482	P08238	1	0.8843771902700476
Q9NYV4	P63104	1	0.7879693718979431
P22694	P06396	1	0.6897978080120936
P17252	Q8N0W4	1	0.7240653129938847
P28482	O75582	1	0.9626700680272112
P53350	Q9BVS4	1	0.7107799221927131
P19784	Q14005	1	0.812540283790284
P23443	Q8TB45	1	0.9026436130007558
Q04759	O14974	1	0.8586738084388459
P17612	P39019	0	0.0999854920212063
Q96GD4	P26038	0	0.2326747921390779
P17252	P29350	1	0.7657004787151847
Q13315	Q8TAQ2	1	0.6425454373668659
Q05655	Q14896	1	0.9064387926887926
O14757	Q9GZR7	1	0.7455155454379594
P24941	O15511	0	0.0470391753192505
P42345	Q9Y2J4	1	0.7835957494886067
Q15418	Q16821	1	0.8976025693882838
Q00535	Q96RR4	1	0.8225348791420217
O14757	P46013	1	0.9285563114134546
P19784	P17655	1	0.6858560817489388
Q15349	P25963	1	0.8915074934811776
Q99558	Q9BR76	0	0.3936463239141808
Q13177	P62805	1	0.822803052067758
Q8IVT5	P04049	1	0.9791928640142924
Q9P1W9	P41279	1	0.8174475061975061
P19784	Q96SB4	1	0.7119852435923866
Q96RR4	O00161	0	0.3120364919472062
P06241	Q96LC7	1	0.9454306672163816
Q13131	P11233	0	0.4282393532393531
Q8TD19	Q6UVK1	1	0.6607285812875873
Q96S44	P62745	1	0.7074386724386728
Q15300	O00560	0	0.0
Q92630	O75449	1	0.7900547138047136
Q9BYP7	P55011	1	0.7580220440934727
Q8TD19	P62745	1	0.6741715889930178
O00418	O00418	0	0.0
P28482	P17252	0	0.2545505156219442
O95382	P45983	1	0.5523235758950045
P45984	P13861	0	0.1203622105407819
Q13315	Q92945	1	0.9510640153497296
P22694	Q14896	1	0.6167475778190064
Q92630	Q14195	1	0.926699460592318
Q13976	Q15052	1	0.7754450113378686
P19784	P18887	1	0.6477788084930943
P24941	Q92542	0	0.3588941840826508
Q9P286	P15976	1	0.7952723070580214
Q96BR1	P35372	0	0.1269159775409775
P27361	Q96FF9	1	0.9603511303511306
Q9HC98	P23443	1	0.63008855562427
P68400	Q96FW1	1	0.6548543916401058
P28482	P24941	1	0.8851233819090962
Q92630	Q13541	1	0.8957975754404325
P12931	O00560	1	0.523199621002416
P27361	Q01860	1	0.9244278406778408
Q92630	P61978	0	0.0693817293817293
Q13188	Q14118	0	0.1626105442176871
P51617	P0DMV8	0	0.0453566274994846
P31749	P29475	1	0.8948975640761356
P23443	Q9Y4G8	0	0.2563930117501545
P19784	Q01892	1	0.6496344396344393
P78527	P42575	1	0.8609517863089294
P19784	P06748	1	0.6851306431663573
P48729	Q9H6E5	1	0.8781635923600211
Q00535	Q16643	0	0.3528238163952449
P19784	Q13526	1	0.642219559540988
Q04759	P63244	1	0.8607416978020316
Q8N5S9	P51636	1	0.7444285870740595
Q9BUB5	O00560	0	0.240839973518545
P00519	Q00987	1	0.9641772050700624
P31749	Q9P0V3	1	0.6722016343444914
P43250	P04040	0	0.0604213907785336
Q9NYV4	Q9NYV4	0	0.0
P34947	P17655	0	0.3541505440560061
Q15418	P03372	1	0.951875901875902
Q13315	P12830	0	0.2187462273176558
P19784	P11836	1	0.7037920875420876
Q92630	Q14195	1	0.926699460592318
Q96BR1	P49840	1	0.6614465754498977
P19784	P15529	1	0.7365596440596442
Q9HC98	O60716	1	0.735808510272796
P19784	P61978	1	0.6879380275808846
P00519	P15311	0	0.390792732399875
P17612	P35240	1	0.9525287080644224
P17612	Q96CW1	1	0.7151755298078826
P68400	Q9H2G2	1	0.7773007878365019
P68400	Q07954	1	0.7029139246996389
P06493	P62136	1	0.7602097604776176
P17252	P01116	1	0.7144176557569413
P17612	Q96NW7	0	0.3538120515770284
P19784	Q13526	1	0.642219559540988
Q9Y243	Q9UKV8	1	0.7435808767951623
Q9NYV4	Q9NYV4	0	0.0
Q04759	O43516	1	0.6211395416752558
P68400	P01116	1	0.8124887480244624
P53350	Q9Y2T1	1	0.7973823134537424
P48730	P35372	0	0.0356445406445406
P22694	P30518	1	0.6798685837971553
Q16566	P23396	1	0.5593941177869749
Q9HC98	Q14118	1	0.7171465901823044
P06239	P27986	1	0.8622574119002689
O00418	Q9Y4G8	0	0.3332055096961929
Q04759	P11021	0	0.1510504706933279
P19784	P84090	1	0.737391576677291
Q9NYV4	P31749	1	0.7598823266680409
P19784	Q13526	1	0.642219559540988
P12931	P42224	1	0.9698082010582012
P49841	Q15208	1	0.8353234728234729
P17252	P15382	1	0.7790702947845806
P19784	Q13526	1	0.642219559540988
O14757	Q9UJM3	1	0.8173871895300465
P68400	P49427	1	0.9398276062561776
P19784	Q13526	1	0.642219559540988
P51955	Q14118	0	0.1650265640444211
Q96GD4	Q03135	0	0.1908980107194393
Q99640	P06493	1	0.7675533266230272
Q13315	P00749	0	0.1290779987208558
P68400	Q92542	0	0.4371164602204518
P68400	P11387	1	0.8118800247371679
O14757	Q9Y3Y2	1	0.6255428433999863
Q9H4B4	P30304	1	0.9097683731612304
Q13418	P04083	0	0.0970256000613143
P35626	P30874	1	0.6645494056208344
P06241	Q9UQB3	0	0.3709670256991686
P07949	Q8TEW0	0	0.2656761855868998
O14757	P23458	1	0.8402008110936682
P06241	P31994	1	0.8263243998065425
P19784	P32121	1	0.665400690579262
P17612	P48729	1	0.8832448486641037
Q13153	Q13233	1	0.8869662017876305
Q38SD2	P06396	0	0.130633744562316
P27361	P27824	0	0.3830479903694189
P19784	Q13526	1	0.642219559540988
Q8TDX7	P27348	1	0.7008751631965917
P19784	Q13526	1	0.642219559540988
Q96GD4	P35659	1	0.8959087605516177
Q9BWU1	O00303	1	0.665523173916031
P48730	O14641	1	0.913618497904212
Q99558	P11717	0	0.3309427146927146
Q13976	P31146	0	0.0140608465608465
Q00535	P36507	1	0.8806463443963445
P19784	Q8WXH0	1	0.7676248024462312
P17252	Q06124	1	0.8920333039975897
P17252	P07737	1	0.8096587504104118
Q9UQM7	P61978	0	0.0053571428571428
O14757	Q7Z2Z1	1	0.9027043393114824
P42680	P16885	1	0.936233792662364
Q04759	P17655	0	0.0564039135467706
P19784	P11021	1	0.6636432218575073
O00141	P46527	1	0.8970697911806935
Q9UKI8	Q99638	1	0.8696031746031745
O96017	Q15717	1	0.9762541426827142
P19784	P67870	1	0.6791828145399573
Q04759	P15311	0	0.4921540914345534
Q9NQU5	Q9BY11	1	0.6694021917236204
P19784	P17931	1	0.682118291761149
Q9NYV4	Q9NYV4	0	0.0
Q96RR4	Q16566	1	0.8489773586202156
O43683	P62834	0	0.1710795025080739
Q96GD4	Q9UKV0	1	0.8880202337345194
P22694	P08138	1	0.7265172988387273
P28482	Q13485	1	0.7985131931560502
Q04759	P63244	1	0.8607416978020316
Q6P5Z2	P30622	1	0.6187560125060122
Q99640	Q86UL8	0	0.2401071283214139
Q13976	Q8WZ42	1	0.8694687521473238
Q04759	Q9BXL7	1	0.8925821995464851
Q92630	Q02750	0	0.3890292951339214
Q04759	Q5JVS0	1	0.8838644886859172
Q15569	Q9Y281	1	0.7762454873169159
Q04759	Q9BXL7	1	0.8925821995464851
P19784	Q01892	1	0.6496344396344393
P19784	Q86UL8	1	0.6339341544698686
P41240	P06396	0	0.3702989459596051
P19784	P00749	1	0.6856330309901738
P22612	P61978	0	0.0200812547241118
A9UF07	P46109	0	0.0
Q96KB5	P68431	1	0.8433437263794409
P19784	P61978	1	0.6879380275808846
Q04759	P63244	1	0.8607416978020316
Q92630	Q92630	0	0.0
Q16816	P10636	1	0.7549191747406032
Q96L34	P05023	0	0.1471816807531093
P19784	P09497	1	0.6900005153576583
Q9UQM7	Q13177	0	0.4309837979480838
Q9H2X6	P11717	0	0.0924907235621521
P00533	Q9P0J1	1	0.8320020125377267
Q16584	Q16584	0	0.0
P19784	Q13526	1	0.642219559540988
P28482	Q9P2Y5	1	0.7983525469239755
P19784	Q13526	1	0.642219559540988
Q00535	P06729	1	0.7721246478389335
P12931	P14923	0	0.0449020820449392
Q04759	P10588	1	0.8930319349962205
O00418	O00418	0	0.0
Q99558	P25963	1	0.8812982718339861
P54764	Q00535	1	0.712823816395245
P19784	P28482	1	0.6554344465058749
Q6IQ55	P00749	1	0.6925289348451111
Q6P2M8	O43432	1	0.7550069573283861
P19784	P13349	1	0.6416599207670637
P43405	P05106	1	0.6591520648663505
P19784	P17655	1	0.6858560817489388
P11802	P07355	0	0.2706378172092458
P19784	Q13526	1	0.642219559540988
P19784	P06748	1	0.6851306431663573
Q6IQ55	Q7L0J3	1	0.7279562633134062
Q04759	P35236	1	0.8796565141207997
Q13464	O60237	1	0.7146393156736776
P68400	O75955	0	0.1537205529318244
P68400	P01116	1	0.8124887480244624
Q04759	Q12959	0	0.2134640623926337
Q13188	O60716	0	0.1321205646205646
P19784	P52655	1	0.7015948601662886
Q13188	P38646	1	0.8280615680615679
P53350	Q96SB3	1	0.5218341314769886
O75914	P17600	1	0.7272094241737099
Q96L34	Q96L34	0	0.0
Q9UQ88	O95238	1	0.5791375225303798
Q8N5S9	Q16625	0	0.4559231178874036
Q9UQ88	P21127	1	0.8786033344961914
Q9NWZ3	Q03135	0	0.4244788016216587
Q9BZL6	Q15366	0	0.334732410446696
P19784	Q13526	1	0.642219559540988
Q9NYV4	P24928	1	0.696365697794269
P12931	O00560	1	0.523199621002416
Q13131	P46940	0	0.4811167964195914
Q8N5S9	Q8IU85	1	0.7862118635332921
P31749	P10275	1	0.9943849206349208
Q99558	P62280	0	0.1080235042735042
P19784	P61978	1	0.6879380275808846
Q04759	P63244	1	0.8607416978020316
Q92630	P10636	1	0.8570557616986189
Q96GD4	P31431	0	0.4872342604485459
P41743	Q6P1M3	1	0.6282949391877962
Q05655	P08473	0	0.1605251129707652
P17252	P10301	1	0.8419481141463895
Q8IW41	O15143	1	0.6442559303318922
P27361	P14923	0	0.0873990243017336
P24941	O95295	1	0.8528712094783523
P17612	P63252	1	0.8208718662290089
Q9NYV4	P24928	1	0.696365697794269
Q05655	Q05655	0	0.0
Q13188	P17252	1	0.7200252654350746
P17612	P27815	1	0.674945669409955
P06241	Q16625	0	0.2064811346061345
P19784	Q12959	1	0.7112511166082593
P19784	P61978	1	0.6879380275808846
P68400	Q92974	0	0.4136537796936956
Q9UQ88	P27361	0	0.2274012683280055
P68400	Q14493	1	0.857669017490446
P17612	P33076	1	0.929013863121006
P07948	Q13291	0	0.3645120590451486
P19784	P55957	1	0.6991347012775582
Q96RR4	P17655	0	0.091260873165635
Q04759	P28482	0	0.0625596097024668
P19784	Q13526	1	0.642219559540988
O15530	Q15349	1	0.8091159634016778
Q13535	P54132	1	0.9217554799697658
P27448	P28482	0	0.0689323507180649
P67775	O43524	0	0.0
Q9UEW8	P13861	0	0.0845687315330172
Q8N5S9	P28482	0	0.3125728372156944
P68400	P14317	1	0.766769351680066
P17612	P06400	1	0.8096707325389229
Q9UL54	Q9UL54	0	0.0
Q04759	P04083	0	0.2472054730983303
P17612	P36955	1	0.8300394380751521
Q15118	P23443	1	0.8907503475360616
P22612	P29474	1	0.927641723356009
P19784	O00161	1	0.6898115508829794
Q8TD19	P0DMV8	1	0.6686412529269673
Q04759	Q02750	0	0.2447789401956068
P19784	P41236	1	0.7199027691884833
Q9Y243	Q13188	1	0.8627569916855632
P24941	P17096	1	0.8349782426568142
Q9NYV4	Q9NYV4	0	0.0
P19784	Q6FHW4	1	0.6213007627293342
P19784	P17931	1	0.682118291761149
P78527	Q14344	1	0.7742577280329381
P28482	Q6NZI2	0	0.4681267674124816
P42684	P0DMV8	0	0.0580218511647083
Q04759	Q9UEW8	1	0.8763601102322907
Q8N5S9	Q13131	1	0.6448084587370303
Q06187	Q6UVK1	0	0.0949851074851074
P19784	O00161	1	0.6898115508829794
P19784	P04792	1	0.6495364556078842
Q8N5S9	Q8TDC3	1	0.7355185423042566
O14757	Q13257	1	0.948622878444307
O75582	Q15831	1	0.925789184360613
P19784	Q13526	1	0.642219559540988
P28482	P07900	1	0.7736411736411736
P45985	P19793	1	0.6743587431087432
Q9BUB5	P04792	1	0.6997695492338349
Q15300	Q15300	0	0.0
Q05513	P11717	0	0.0888695930285792
Q13464	P62834	0	0.1104075620147048
Q04759	P35236	1	0.8796565141207997
P10644	Q12959	0	0.0
P42336	P62258	0	0.0
P53350	Q9BR76	0	0.1549869046297618
Q04759	P63244	1	0.8607416978020316
Q13131	O43524	1	0.9422850165707308
Q16816	P62258	1	0.7359685288256718
P31749	P35222	1	0.8594956366384938
Q9BUB5	P04792	1	0.6997695492338349
Q9BUB5	P06730	1	0.8874384147598434
P51812	Q2M1Z3	1	0.5653153162974592
P12931	O15056	1	0.7186515810027714
Q9HC98	Q13418	1	0.6252575070432214
O15111	O15511	0	0.0828936071457445
P43405	P51636	0	0.3233757140899998
Q13464	P04637	1	0.9327647220504364
P24941	Q99439	1	0.9309819281247854
P31749	Q13043	1	0.9609126984126984
Q04759	P11912	0	0.1297972497079639
P19784	Q13526	1	0.642219559540988
P19784	Q02750	1	0.65166280148423
O00418	P13639	1	0.7812259598866742
P17612	P17655	0	0.0068509929224214
Q9BYP7	Q9UK17	1	0.6870031952174811
Q15831	Q14155	0	0.133813540956398
O14757	P32004	1	0.8830571016285301
P19784	P04198	1	0.7308146945646946
Q16816	O00560	1	0.7336367072081359
Q99558	O14920	1	0.8836549165120595
Q04759	P50570	0	0.2083717963153737
P42684	O00560	0	0.2166282209853638
Q92630	Q02750	0	0.3890292951339214
P68400	O75955	0	0.1537205529318244
P19784	Q13526	1	0.642219559540988
P06493	O75122	1	0.8194571466892896
P19784	Q13526	1	0.642219559540988
P49841	Q8WX93	0	0.4894262813905668
Q05655	P53004	1	0.8707429211000639
P19784	P13349	1	0.6416599207670637
Q13177	P01236	1	0.7501086545729403
Q9NYV4	P24928	1	0.696365697794269
O75914	Q9Y4G8	1	0.727047780262066
P07949	P31749	1	0.8842004225932797
Q16816	P10636	1	0.7549191747406032
Q13188	P0DMV8	0	0.0665480837504647
P07948	P13569	1	0.729774359238645
P19784	P06748	1	0.6851306431663573
P24941	O15511	0	0.0470391753192505
Q16539	P52945	1	0.8683956057170342
P19784	O14958	1	0.5721840527197669
P17612	Q14254	1	0.712503220985364
Q8N5S9	P28482	0	0.3125728372156944
P12931	P46940	1	0.6484679229112003
P19784	Q13526	1	0.642219559540988
Q9P286	P31146	1	0.7381703151346007
P28482	Q9P2Y5	1	0.7983525469239755
P19784	O00161	1	0.6898115508829794
P19784	P17655	1	0.6858560817489388
Q92630	P04083	0	0.3598951577523006
P17252	P62834	0	0.1568711777640349
P28482	P49841	1	0.9808531746031746
Q15418	P13498	0	0.059028754418792
P19784	P35372	1	0.7265866474795049
Q9BUB5	Q8TEW0	0	0.3254462680317544
P53779	P04637	1	0.935288342609771
P10644	P04439	0	0.0
O00418	P27361	0	0.2651852006436582
Q9HC98	P06396	1	0.7000581627367339
Q96RR4	P11021	0	0.2625906404996266
Q16816	P10636	1	0.7549191747406032
P17252	Q14676	1	0.8417298706584422
Q99558	Q14118	0	0.4659746272246271
P19784	Q9Y5B0	1	0.6552768329554043
P45983	P08047	1	0.960740912526627
Q15759	Q8TDY4	0	0.4365962807034234
P19784	Q12972	1	0.7050647784366273
P19784	Q13526	1	0.642219559540988
P19784	Q13526	1	0.642219559540988
P53779	Q6UVK1	0	0.1842075860071589
P06241	P12318	1	0.8884642632192464
P22694	P04040	1	0.8105497148354287
P24941	Q9P2B4	1	0.644429131805979
P43405	P61073	0	0.2748378473378473
P05771	P48736	1	0.8680079708651136
Q92630	P31645	0	0.2465762465048179
P68400	O95819	1	0.6060520167663025
Q8IW41	O00418	1	0.8500494743351886
Q8TD19	P62745	1	0.6741715889930178
Q9H4B4	P05412	1	0.8608812880241453
P11802	P07355	0	0.2706378172092458
Q13131	Q7Z3C6	1	0.8361329279186421
P06493	Q9BPX3	1	0.8689141414141414
P28482	P30041	1	0.8147427967802211
P28482	O00429	1	0.936889472960902
P19784	Q13526	1	0.642219559540988
Q04759	P63244	1	0.8607416978020316
Q96GD4	P63104	1	0.7649366969009828
P19784	P37840	1	0.6429299140013425
Q04759	P15407	1	0.7969340513983371
Q8TD19	Q9HC98	1	0.5317395038823608
Q7L7X3	P28482	0	0.0931792843399986
P19784	P11021	1	0.6636432218575073
Q9Y2U5	O14733	1	0.6888096097024669
P19784	Q8WXH0	1	0.7676248024462312
Q04759	Q9UEW8	1	0.8763601102322907
Q9NYV4	Q9NYV4	0	0.0
Q04759	P31645	0	0.2328858626905192
Q9Y3S1	Q9H4A3	1	0.6265167834810692
P17612	Q14254	1	0.712503220985364
P22607	O14786	0	0.4082000274857422
Q13882	Q99704	1	0.9079524233936
Q6IQ55	Q15599	1	0.7192945612588469
Q92630	Q05513	0	0.4725405729840456
Q13188	P00523	1	0.6739285383928241
O75914	Q02750	1	0.7408484504913078
P31749	Q9UKV3	1	0.8977254017549049
Q04759	Q92542	0	0.3821336332943477
Q99558	O43707	0	0.3002044919153214
Q16816	P04040	1	0.709598965848966
Q00535	P17600	1	0.9184372637944068
O75582	Q12959	0	0.0557952489747183
Q15569	P23528	1	0.617296301582016
P07948	Q13873	1	0.6797437057123069
Q05655	P04637	1	0.9638619185047756
Q13153	O95863	1	0.9460459183673467
P06241	P51809	0	0.3849870301656016
P45984	P13861	0	0.1203622105407819
Q92630	P43686	1	0.6389516537576576
Q8N5S9	Q16566	1	0.8156455185026613
P24941	P05556	1	0.8584033096533097
Q6IQ55	P28482	1	0.6328761780547495
Q13131	P05023	0	0.1338600751100751
Q9NYV4	P31146	1	0.6993996083281796
Q92630	P04637	1	0.9177781710895891
P19784	Q12959	1	0.7112511166082593
P06493	O00429	1	0.944697656840514
P36897	Q96FW1	1	0.6926180697609267
PR:000026196	Q15796	0	0.0
P19784	P04198	1	0.7308146945646946
P22612	P35372	0	0.0831934015202648
P19784	Q13526	1	0.642219559540988
O00418	P18206	0	0.1109183343111914
P41279	Q13541	1	0.8742510994296708
Q92630	P10636	1	0.8570557616986189
Q13131	P12814	1	0.6327826508702086
P49841	Q92597	1	0.8685050399336116
P22612	Q14896	1	0.8454953875489593
P41743	Q9UQB8	0	0.3878272007517291
P24941	P17676	1	0.9191654793230424
Q05513	Q8IX03	1	0.9460374149659864
Q13535	P38398	1	0.983265306122449
P19784	Q13526	1	0.642219559540988
P68400	P45973	1	0.8826579073947496
Q02156	Q14160	0	0.4740018248946822
Q8TD19	Q8TD19	0	0.0
P28482	Q96SB3	0	0.4367838003668747
Q9UHD2	Q16625	0	0.2959075876389541
P24941	P07947	1	0.6985412982397261
P06493	P31948	1	0.7139996907854049
P19784	P52655	1	0.7015948601662886
P31751	O60331	1	0.944138407888408
P17252	P08034	1	0.6517260186903043
P19784	P04083	1	0.6664867209510067
P28482	Q12778	1	0.9898713323713324
Q13464	P53671	1	0.8405866880960866
Q9UPZ9	Q8N122	1	0.911542406006692
P19784	P17655	1	0.6858560817489388
Q13535	Q9BXW9	1	0.8086076522683664
P19784	O15511	1	0.7201066790352505
O00418	O00418	0	0.0
Q96GD4	P60953	0	0.1756405895691609
P07332	P11021	0	0.1280436593829451
O14920	O00161	0	0.2422068407782694
Q13177	P27824	0	0.1200758236472522
P27361	Q16625	0	0.1434479971087114
Q99558	O15111	1	0.7746486711665284
O75914	P06396	1	0.6054042121899266
P17252	P62258	0	0.4589516832373973
Q13237	P32929	1	0.6834356031975078
P19784	P22681	1	0.6454328145399573
P19784	Q6FHW4	1	0.6213007627293342
P19784	Q9Y5B0	1	0.6552768329554043
P49841	P30281	1	0.8501120406747092
P31749	P23396	1	0.8396995464852608
Q16539	P62834	0	0.2548169621383906
Q92630	P12931	1	0.5787014255585685
Q2M2I8	Q9BXS5	1	0.6920117845117846
P19784	P11021	1	0.6636432218575073
P19784	P28482	1	0.6554344465058749
Q92630	Q12959	0	0.2657189148918472
P06241	Q16625	0	0.2064811346061345
P19784	P60484	1	0.6425501614787328
Q6P5Z2	P00533	1	0.632022864701436
Q13535	P35372	0	0.0142942176870748
O75914	P04049	1	0.6954140898783755
Q04759	P63244	1	0.8607416978020316
Q13464	P17661	0	0.4435972113204258
Q13153	P54764	0	0.3903555075876505
Q9UM73	P14618	1	0.910181465360037
P45984	P31947	1	0.7820839826066307
P22612	Q16625	0	0.3109523180408274
Q04759	P31645	0	0.2328858626905192
P12931	Q4VCS5	1	0.7975945681302826
P28482	P08238	1	0.8843771902700476
P19784	Q13526	1	0.642219559540988
P17252	P43629	1	0.9862830687830688
P11802	Q9BQA1	1	0.754823833573834
P45983	P63104	1	0.7503370056325724
Q9UM73	Q06124	1	0.9007447975305118
P54646	P06241	0	0.3349332611832611
Q15831	P35372	0	0.0211330138115852
Q14164	O95786	1	0.9048859672073958
Q13188	P46937	1	0.955160619803477
P31749	Q09470	1	0.8673027039098465
A0A173G4P4	P04040	0	0.0
P31749	O14640	0	0.1682262049059198
Q96GD4	P17948	1	0.7004658833230262
Q15300	P40763	0	0.0
Q02156	Q99259	1	0.8810300427086142
P19784	P17096	1	0.6436277743420602
Q14680	Q99683	1	0.8119046669704565
Q9NYV4	O43707	1	0.5225823476377661
P31152	P0DMV8	0	0.4419979821765535
P12931	Q13444	1	0.8948638596852885
Q04759	P63244	1	0.8607416978020316
Q04759	O43516	1	0.6211395416752558
Q13315	P00749	0	0.1290779987208558
P17252	Q9NQA5	1	0.7471426062435379
P53778	P26045	1	0.8862957677243392
P19784	Q13526	1	0.642219559540988
P07947	P08172	1	0.5978824978997785
Q9HC98	O00141	1	0.6388984230055659
Q00535	Q15833	1	0.6763351385789275
O14757	Q9UPP1	1	0.8209448223733938
P27361	O43521	1	0.9594889369889368
Q13627	P05023	0	0.1511559425635056
P51813	P08581	1	0.7853272377974757
Q13535	Q8WXH0	0	0.0257111935683364
P19784	Q92598	1	0.6604836697693838
Q8TD19	P46783	1	0.6044081976224833
P19784	Q13526	1	0.642219559540988
P28482	P19438	1	0.8711672947268732
Q13153	Q96A00	1	0.9614386209029068
P19784	P55087	1	0.6558852985638701
P67870	P06748	0	0.0
Q13188	O00560	0	0.0869072372538758
O14730	Q9BYX4	1	0.6274547608476182
Q8TD19	Q8TD19	0	0.0
Q13557	P26678	1	0.8200025305382449
Q13315	P00749	0	0.1290779987208558
P19784	Q13526	1	0.642219559540988
P54764	P19174	1	0.9211741102812532
Q9Y243	P22681	1	0.5056470579684867
P19784	P04083	1	0.6664867209510067
P28482	Q9C0C2	1	0.8819683028611599
P31749	Q14643	1	0.8863877015452644
P19784	P41236	1	0.7199027691884833
Q5S007	P04637	1	0.9795521541950116
P24941	Q96RK0	1	0.8986882294119134
Q9NQU5	P10275	1	0.8853213760251577
Q9BWU1	Q13153	1	0.718502198859342
P28482	P08238	1	0.8843771902700476
Q14164	Q96FA3	1	0.9533044600901744
Q04759	Q02750	0	0.2447789401956068
P28482	P33981	1	0.9406796906796908
Q9UM73	P04083	0	0.0935080260174245
Q92630	O43602	1	0.9455442176870748
P00519	Q9Y624	1	0.5552342831071823
Q14680	P84022	1	0.8406932217331375
Q9BUB5	P04040	0	0.0913116711330997
P57059	Q53ET0	1	0.6550565770208627
Q04759	Q04759	0	0.0
Q13131	P07355	0	0.266891946677661
P19784	Q01892	1	0.6496344396344393
P19784	Q02750	1	0.65166280148423
P19784	P11021	1	0.6636432218575073
P06493	P29590	1	0.965752937538652
Q7KZI7	Q8WUI4	1	0.960043547722119
P17252	P61764	0	0.3093827237577237
Q05655	P17655	0	0.0314543393114821
Q15139	Q99683	1	0.9118435202363774
P24941	P62841	1	0.710982228750086
P00519	Q15746	1	0.9725132275132276
P12931	Q08209	0	0.4802433347076201
Q15208	Q96RD6	1	0.7255207953422239
Q9UL54	P11021	0	0.2038548752834467
P19784	P18887	1	0.6477788084930943
P27361	P14923	0	0.0873990243017336
P68400	P01116	1	0.8124887480244624
Q92630	P10070	1	0.8137182358557646
Q13535	P35372	0	0.0142942176870748
Q04759	P63244	1	0.8607416978020316
P17612	P16615	1	0.8722284461570178
Q99558	O14920	1	0.8836549165120595
P24941	Q8IXM2	1	0.6281509051021247
P19784	Q13526	1	0.642219559540988
Q9NYV4	Q03135	1	0.7251851851851852
P07947	Q05655	1	0.8901606198034768
Q13315	Q5TZA2	1	0.8547423211708922
P17612	Q96NW7	0	0.3538120515770284
O14920	P25963	1	0.9450056689342404
Q9HC98	Q05586	1	0.575690863369435
P30530	P30530	0	0.0
P48729	Q13418	0	0.1267975245653817
P19784	Q16543	1	0.6218273723630868
O96013	P55072	1	0.6651125590096176
O75582	Q92934	1	0.9756802721088436
O14920	Q96CV9	1	0.7570794681508969
P23443	Q92934	1	0.9581746031746032
P78527	P55895	1	0.7011377136493601
Q16816	P10636	1	0.7549191747406032
P50613	Q00534	1	0.832293255686113
P19784	Q12972	1	0.7050647784366273
P17252	P32004	1	0.9550897581254724
P48729	Q00535	1	0.6237518896447467
Q96S44	P04637	1	0.6297067614924758
Q02156	P35241	0	0.4186217023717025
O14757	Q2M1Z3	1	0.5970684243005673
Q9BYP7	P18206	1	0.7293709068709069
P19784	Q9UD71	1	0.699728320621178
P22612	Q14896	1	0.8454953875489593
P19784	P61978	1	0.6879380275808846
Q9HC98	P18206	1	0.7468750495536209
Q9HC98	Q13418	1	0.6252575070432214
P24941	P12268	1	0.7565405163619453
Q99558	P05023	0	0.2289350992922421
P19784	P17655	1	0.6858560817489388
O00418	P62258	1	0.6454967648092648
P31751	P29474	1	0.9580253212396068
Q9UQM7	Q06210	1	0.945820105820106
P28482	Q9UK17	0	0.3099550383478954
Q04759	O15530	1	0.8839380196523055
P19784	Q05513	1	0.6836611866969007
P06493	P39019	0	0.086406351584923
Q15569	P13498	1	0.6672611317254177
P48729	Q13148	1	0.7932517234749379
P68400	P62917	1	0.8205769226882672
Q6P5Z2	P28482	1	0.681736583522298
P51812	P13796	1	0.7950892691964122
P49841	O60341	1	0.8182562873634303
Q13188	Q9H4B6	1	0.8977029914529916
O96017	Q14344	1	0.8466394121751265
P24941	Q9UHR4	1	0.7159861699147415
Q6IQ55	O00139	1	0.7162642096803589
Q15418	P26038	0	0.1972674742002473
P19784	Q13526	1	0.642219559540988
Q05513	P35579	0	0.3916010642796356
Q96GD4	P45973	1	0.8858806603449461
P31751	P00749	0	0.0927874572517429
P17252	Q9UJY1	1	0.8035757791488687
Q92630	P05412	1	0.7883327750292034
Q15759	O60381	1	0.7188978217549647
P19784	Q02750	1	0.65166280148423
Q13464	P05023	0	0.1874355208283779
P68400	O75955	0	0.1537205529318244
P19784	P28482	1	0.6554344465058749
P28482	Q9NRA0	1	0.9291274994846422
Q16816	P27361	1	0.7620641792070362
P42345	Q00613	1	0.8703331787260358
Q15569	P31146	1	0.6777337279122992
P27361	Q15599	0	0.2393820927749499
P54764	Q9UJU6	1	0.5390344774273346
P28482	Q92934	1	0.9691780045351474
P19784	P17655	1	0.6858560817489388
P41743	P19022	0	0.1594357692571978
P19784	Q01892	1	0.6496344396344393
P17612	P39019	0	0.0999854920212063
Q7L7X3	P46734	1	0.8528781127835751
Q99558	Q00653	1	0.786426813926814
P28482	Q9H3Z4	0	0.1954323652537939
Q9NQU5	Q9NQU5	0	0.0
P22612	Q14896	1	0.8454953875489593
Q9NQU5	Q00987	1	0.8103177708534854
Q04759	O15111	1	0.8120698481412767
P19784	Q712K3	1	0.6665775097917955
P19784	P61978	1	0.6879380275808846
Q96RR4	P17655	0	0.091260873165635
P12931	Q00987	1	0.9507719198790628
P17612	Q05469	1	0.9736507936507935
Q9HC98	Q03135	1	0.656329834186977
O00418	O00418	0	0.0
P19784	P28482	1	0.6554344465058749
Q9UQ88	P0DMV8	0	0.1286131989703418
P17252	P02686	1	0.9654535147392292
Q04759	P04083	0	0.2472054730983303
P24941	P15172	1	0.9213660413660412
Q9HC98	O00141	1	0.6388984230055659
O14757	O15350	1	0.9666014739229022
P12931	P36544	1	0.8953633271490417
Q16539	P10636	1	0.7262476744656549
Q16539	Q14765	1	0.7007229000462085
P49841	Q9UQB3	0	0.4064681185216899
[truncated: 407 more rows]
