# Supplementary material for: A knowledge graph representation learning approach to predict novel kinase–substrate interactions
Source: Royal Society of Chemistry journal article supplement (doi:10.1039/d1mo00521a), 2022-08-17
Supplement: d1mo00521a9.csv [file d1mo00521a9.csv]

fold	model_type	task_type	score_type	score_val
0	triple_walk_cbow	edge_pred	au_roc	0.7091339260604378
0	triple_walk_cbow	edge_pred	precision	0.5261277355962484
0	triple_walk_cbow	edge_pred	recall	0.9792186201163757
0	triple_walk_cbow	clf_kinase_substrate	au_roc	0.8628654970760233
0	triple_walk_cbow	clf_kinase_substrate	precision	0.7169811320754716
0	triple_walk_cbow	clf_kinase_substrate	recall	0.8444444444444444
0	triple_walk_cbow	clf_ec	au_roc	0.7837820512820513
0	triple_walk_cbow	clf_ec	precision	0.6590909090909091
0	triple_walk_cbow	clf_ec	recall	0.7733333333333333
0	triple_walk_cbow	clf_ec_full	au_roc	0.7503501400560224
0	triple_walk_cbow	clf_ec_full	precision	0.7297297297297297
0	triple_walk_cbow	clf_ec_full	recall	0.6428571428571429
0	triple_walk_sg	edge_pred	au_roc	0.7766545813355223
0	triple_walk_sg	edge_pred	precision	0.6145434663750683
0	triple_walk_sg	edge_pred	recall	0.9343308395677473
0	triple_walk_sg	clf_kinase_substrate	au_roc	0.6905945419103313
0	triple_walk_sg	clf_kinase_substrate	precision	0.5462184873949579
0	triple_walk_sg	clf_kinase_substrate	recall	0.7222222222222222
0	triple_walk_sg	clf_ec	au_roc	0.6783333333333333
0	triple_walk_sg	clf_ec	precision	0.5617977528089888
0	triple_walk_sg	clf_ec	recall	0.6666666666666666
0	triple_walk_sg	clf_ec_full	au_roc	0.5413165266106442
0	triple_walk_sg	clf_ec_full	precision	0.5625
0	triple_walk_sg	clf_ec_full	recall	0.42857142857142855
0	deepwalk_sg	edge_pred	au_roc	0.620166472154333
0	deepwalk_sg	edge_pred	precision	0.5396825396825397
0	deepwalk_sg	edge_pred	recall	0.6500415627597672
0	deepwalk_sg	clf_kinase_substrate	au_roc	0.591374269005848
0	deepwalk_sg	clf_kinase_substrate	precision	0.4745762711864407
0	deepwalk_sg	clf_kinase_substrate	recall	0.6222222222222222
0	deepwalk_sg	clf_ec	au_roc	0.696602564102564
0	deepwalk_sg	clf_ec	precision	0.55
0	deepwalk_sg	clf_ec	recall	0.7333333333333333
0	deepwalk_sg	clf_ec_full	au_roc	0.7076330532212886
0	deepwalk_sg	clf_ec_full	precision	0.7142857142857143
0	deepwalk_sg	clf_ec_full	recall	0.5952380952380952
0	deepwalk_cbow	edge_pred	au_roc	0.6733598948044132
0	deepwalk_cbow	edge_pred	precision	0.5383488031265267
0	deepwalk_cbow	edge_pred	recall	0.9160432252701579
0	deepwalk_cbow	clf_kinase_substrate	au_roc	0.7282163742690059
0	deepwalk_cbow	clf_kinase_substrate	precision	0.6372549019607843
0	deepwalk_cbow	clf_kinase_substrate	recall	0.7222222222222222
0	deepwalk_cbow	clf_ec	au_roc	0.7349358974358974
0	deepwalk_cbow	clf_ec	precision	0.6071428571428571
0	deepwalk_cbow	clf_ec	recall	0.68
0	deepwalk_cbow	clf_ec_full	au_roc	0.761904761904762
0	deepwalk_cbow	clf_ec_full	precision	0.7941176470588235
0	deepwalk_cbow	clf_ec_full	recall	0.6428571428571429
0	distmult	edge_pred	au_roc	0.6193614743965798
0	distmult	edge_pred	precision	0.5289902280130293
0	distmult	edge_pred	recall	0.6749792186201163
0	distmult	clf_kinase_substrate	au_roc	0.7607699805068227
0	distmult	clf_kinase_substrate	precision	0.6736842105263158
0	distmult	clf_kinase_substrate	recall	0.7111111111111111
0	distmult	clf_ec	au_roc	0.7471153846153847
0	distmult	clf_ec	precision	0.631578947368421
0	distmult	clf_ec	recall	0.64
0	distmult	clf_ec_full	au_roc	0.6624649859943977
0	distmult	clf_ec_full	precision	0.6666666666666666
0	distmult	clf_ec_full	recall	0.6666666666666666
0	node2vec_sg	edge_pred	au_roc	0.6370748799931454
0	node2vec_sg	edge_pred	precision	0.5458362491252624
0	node2vec_sg	edge_pred	recall	0.6483790523690773
0	node2vec_sg	clf_kinase_substrate	au_roc	0.6186159844054581
0	node2vec_sg	clf_kinase_substrate	precision	0.5172413793103449
0	node2vec_sg	clf_kinase_substrate	recall	0.6666666666666666
0	node2vec_sg	clf_ec	au_roc	0.6941025641025642
0	node2vec_sg	clf_ec	precision	0.5212765957446809
0	node2vec_sg	clf_ec	recall	0.6533333333333333
0	node2vec_sg	clf_ec_full	au_roc	0.6911764705882353
0	node2vec_sg	clf_ec_full	precision	0.7272727272727273
0	node2vec_sg	clf_ec_full	recall	0.5714285714285714
0	node2vec_cbow	edge_pred	au_roc	0.6987104143216357
0	node2vec_cbow	edge_pred	precision	0.5376884422110553
0	node2vec_cbow	edge_pred	recall	0.9783873649210307
0	node2vec_cbow	clf_kinase_substrate	au_roc	0.7438596491228069
0	node2vec_cbow	clf_kinase_substrate	precision	0.61
0	node2vec_cbow	clf_kinase_substrate	recall	0.6777777777777778
0	node2vec_cbow	clf_ec	au_roc	0.6812820512820513
0	node2vec_cbow	clf_ec	precision	0.5126050420168067
0	node2vec_cbow	clf_ec	recall	0.8133333333333334
0	node2vec_cbow	clf_ec_full	au_roc	0.6498599439775911
0	node2vec_cbow	clf_ec_full	precision	0.5714285714285714
0	node2vec_cbow	clf_ec_full	recall	0.47619047619047616
0	transe	edge_pred	au_roc	0.6101537511168049
0	transe	edge_pred	precision	0.545631067961165
0	transe	edge_pred	recall	0.9343308395677473
0	transe	clf_kinase_substrate	au_roc	0.5898635477582845
0	transe	clf_kinase_substrate	precision	0.5192307692307693
0	transe	clf_kinase_substrate	recall	0.6
0	transe	clf_ec	au_roc	0.547371794871795
0	transe	clf_ec	precision	0.44144144144144143
0	transe	clf_ec	recall	0.6533333333333333
0	transe	clf_ec_full	au_roc	0.6631652661064426
0	transe	clf_ec_full	precision	0.6818181818181818
0	transe	clf_ec_full	recall	0.35714285714285715
1	triple_walk_cbow	edge_pred	au_roc	0.7066418879374022
1	triple_walk_cbow	edge_pred	precision	0.523117569352708
1	triple_walk_cbow	edge_pred	recall	0.9875311720698254
1	triple_walk_cbow	clf_kinase_substrate	au_roc	0.862548076923077
1	triple_walk_cbow	clf_kinase_substrate	precision	0.8275862068965517
1	triple_walk_cbow	clf_kinase_substrate	recall	0.72
1	triple_walk_cbow	clf_ec	au_roc	0.8124530663329161
1	triple_walk_cbow	clf_ec	precision	0.7558139534883721
1	triple_walk_cbow	clf_ec	recall	0.6914893617021277
1	triple_walk_cbow	clf_ec_full	au_roc	0.6112266112266113
1	triple_walk_cbow	clf_ec_full	precision	0.5675675675675675
1	triple_walk_cbow	clf_ec_full	recall	0.5384615384615384
1	triple_walk_sg	edge_pred	au_roc	0.775361402534119
1	triple_walk_sg	edge_pred	precision	0.6221606648199446
1	triple_walk_sg	edge_pred	recall	0.9334995843724023
1	triple_walk_sg	clf_kinase_substrate	au_roc	0.729375
1	triple_walk_sg	clf_kinase_substrate	precision	0.6804123711340206
1	triple_walk_sg	clf_kinase_substrate	recall	0.66
1	triple_walk_sg	clf_ec	au_roc	0.7306633291614518
1	triple_walk_sg	clf_ec	precision	0.765625
1	triple_walk_sg	clf_ec	recall	0.5212765957446809
1	triple_walk_sg	clf_ec_full	au_roc	0.6143451143451143
1	triple_walk_sg	clf_ec_full	precision	0.5769230769230769
1	triple_walk_sg	clf_ec_full	recall	0.38461538461538464
1	deepwalk_sg	edge_pred	au_roc	0.6259845675365479
1	deepwalk_sg	edge_pred	precision	0.541838134430727
1	deepwalk_sg	edge_pred	recall	0.656691604322527
1	deepwalk_sg	clf_kinase_substrate	au_roc	0.5598076923076923
1	deepwalk_sg	clf_kinase_substrate	precision	0.5487804878048781
1	deepwalk_sg	clf_kinase_substrate	recall	0.45
1	deepwalk_sg	clf_ec	au_roc	0.7470588235294118
1	deepwalk_sg	clf_ec	precision	0.7349397590361446
1	deepwalk_sg	clf_ec	recall	0.648936170212766
1	deepwalk_sg	clf_ec_full	au_roc	0.5585585585585585
1	deepwalk_sg	clf_ec_full	precision	0.5789473684210527
1	deepwalk_sg	clf_ec_full	recall	0.5641025641025641
1	deepwalk_cbow	edge_pred	au_roc	0.6532670816723776
1	deepwalk_cbow	edge_pred	precision	0.533012048192771
1	deepwalk_cbow	edge_pred	recall	0.9193682460515378
1	deepwalk_cbow	clf_kinase_substrate	au_roc	0.6995192307692308
1	deepwalk_cbow	clf_kinase_substrate	precision	0.6210526315789474
1	deepwalk_cbow	clf_kinase_substrate	recall	0.59
1	deepwalk_cbow	clf_ec	au_roc	0.6654568210262829
1	deepwalk_cbow	clf_ec	precision	0.675
1	deepwalk_cbow	clf_ec	recall	0.574468085106383
1	deepwalk_cbow	clf_ec_full	au_roc	0.6354816354816355
1	deepwalk_cbow	clf_ec_full	precision	0.6857142857142857
1	deepwalk_cbow	clf_ec_full	recall	0.6153846153846154
1	distmult	edge_pred	au_roc	0.6286027104585447
1	distmult	edge_pred	precision	0.542997542997543
1	distmult	edge_pred	recall	0.7348295926849543
1	distmult	clf_kinase_substrate	au_roc	0.7971634615384615
1	distmult	clf_kinase_substrate	precision	0.7945205479452054
1	distmult	clf_kinase_substrate	recall	0.58
1	distmult	clf_ec	au_roc	0.7065081351689614
1	distmult	clf_ec	precision	0.6790123456790124
1	distmult	clf_ec	recall	0.5851063829787234
1	distmult	clf_ec_full	au_roc	0.6375606375606374
1	distmult	clf_ec_full	precision	0.6470588235294118
1	distmult	clf_ec_full	recall	0.5641025641025641
1	node2vec_sg	edge_pred	au_roc	0.6308546312246538
1	node2vec_sg	edge_pred	precision	0.5411284840244731
1	node2vec_sg	edge_pred	recall	0.6616791354945969
1	node2vec_sg	clf_kinase_substrate	au_roc	0.6060576923076922
1	node2vec_sg	clf_kinase_substrate	precision	0.5510204081632653
1	node2vec_sg	clf_kinase_substrate	recall	0.54
1	node2vec_sg	clf_ec	au_roc	0.7214643304130163
1	node2vec_sg	clf_ec	precision	0.6781609195402298
1	node2vec_sg	clf_ec	recall	0.6276595744680851
1	node2vec_sg	clf_ec_full	au_roc	0.4629244629244629
1	node2vec_sg	clf_ec_full	precision	0.5
1	node2vec_sg	clf_ec_full	recall	0.5384615384615384
1	node2vec_cbow	edge_pred	au_roc	0.6959181431292923
1	node2vec_cbow	edge_pred	precision	0.532258064516129
1	node2vec_cbow	edge_pred	recall	0.9875311720698254
1	node2vec_cbow	clf_kinase_substrate	au_roc	0.7589423076923076
1	node2vec_cbow	clf_kinase_substrate	precision	0.7419354838709677
1	node2vec_cbow	clf_kinase_substrate	recall	0.69
1	node2vec_cbow	clf_ec	au_roc	0.6703379224030037
1	node2vec_cbow	clf_ec	precision	0.6764705882352942
1	node2vec_cbow	clf_ec	recall	0.48936170212765956
1	node2vec_cbow	clf_ec_full	au_roc	0.6687456687456688
1	node2vec_cbow	clf_ec_full	precision	0.631578947368421
1	node2vec_cbow	clf_ec_full	recall	0.6153846153846154
1	transe	edge_pred	au_roc	0.6245680478769825
1	transe	edge_pred	precision	0.5352372178719484
1	transe	edge_pred	recall	0.9659185369908562
1	transe	clf_kinase_substrate	au_roc	0.5936538461538462
1	transe	clf_kinase_substrate	precision	0.5714285714285714
1	transe	clf_kinase_substrate	recall	0.6
1	transe	clf_ec	au_roc	0.579349186483104
1	transe	clf_ec	precision	0.5970149253731343
1	transe	clf_ec	recall	0.425531914893617
1	transe	clf_ec_full	au_roc	0.45148995148995147
1	transe	clf_ec_full	precision	0.5
1	transe	clf_ec_full	recall	0.5384615384615384
2	triple_walk_cbow	edge_pred	au_roc	0.6867556793801034
2	triple_walk_cbow	edge_pred	precision	0.521034180543383
2	triple_walk_cbow	edge_pred	recall	0.9883624272651704
2	triple_walk_cbow	clf_kinase_substrate	au_roc	0.8034010983717121
2	triple_walk_cbow	clf_kinase_substrate	precision	0.8352941176470589
2	triple_walk_cbow	clf_kinase_substrate	recall	0.6635514018691588
2	triple_walk_cbow	clf_ec	au_roc	0.762468671679198
2	triple_walk_cbow	clf_ec	precision	0.7333333333333333
2	triple_walk_cbow	clf_ec	recall	0.6947368421052632
2	triple_walk_cbow	clf_ec_full	au_roc	0.7461805555555555
2	triple_walk_cbow	clf_ec_full	precision	0.7777777777777778
2	triple_walk_cbow	clf_ec_full	recall	0.525
2	triple_walk_sg	edge_pred	au_roc	0.8000817435491349
2	triple_walk_sg	edge_pred	precision	0.626571897211591
2	triple_walk_sg	edge_pred	recall	0.9526184538653366
2	triple_walk_sg	clf_kinase_substrate	au_roc	0.672800847865883
2	triple_walk_sg	clf_kinase_substrate	precision	0.6448598130841121
2	triple_walk_sg	clf_kinase_substrate	recall	0.6448598130841121
2	triple_walk_sg	clf_ec	au_roc	0.7451754385964912
2	triple_walk_sg	clf_ec	precision	0.6744186046511628
2	triple_walk_sg	clf_ec	recall	0.6105263157894737
2	triple_walk_sg	clf_ec_full	au_roc	0.6291666666666667
2	triple_walk_sg	clf_ec_full	precision	0.6046511627906976
2	triple_walk_sg	clf_ec_full	recall	0.65
2	deepwalk_sg	edge_pred	au_roc	0.6292263246013533
2	deepwalk_sg	edge_pred	precision	0.5460893854748603
2	deepwalk_sg	edge_pred	recall	0.6500415627597672
2	deepwalk_sg	clf_kinase_substrate	au_roc	0.6158107717506504
2	deepwalk_sg	clf_kinase_substrate	precision	0.6170212765957447
2	deepwalk_sg	clf_kinase_substrate	recall	0.5420560747663551
2	deepwalk_sg	clf_ec	au_roc	0.7333959899749374
2	deepwalk_sg	clf_ec	precision	0.7252747252747253
2	deepwalk_sg	clf_ec	recall	0.6947368421052632
2	deepwalk_sg	clf_ec_full	au_roc	0.5552083333333333
2	deepwalk_sg	clf_ec_full	precision	0.6486486486486487
2	deepwalk_sg	clf_ec_full	recall	0.6
2	deepwalk_cbow	edge_pred	au_roc	0.6877261680932056
2	deepwalk_cbow	edge_pred	precision	0.5495495495495496
2	deepwalk_cbow	edge_pred	recall	0.9634247714048213
2	deepwalk_cbow	clf_kinase_substrate	au_roc	0.6706330089604007
2	deepwalk_cbow	clf_kinase_substrate	precision	0.6470588235294118
2	deepwalk_cbow	clf_kinase_substrate	recall	0.514018691588785
2	deepwalk_cbow	clf_ec	au_roc	0.77437343358396
2	deepwalk_cbow	clf_ec	precision	0.7586206896551724
2	deepwalk_cbow	clf_ec	recall	0.6947368421052632
2	deepwalk_cbow	clf_ec_full	au_roc	0.732638888888889
2	deepwalk_cbow	clf_ec_full	precision	0.8
2	deepwalk_cbow	clf_ec_full	recall	0.6
2	distmult	edge_pred	au_roc	0.6394418497950192
2	distmult	edge_pred	precision	0.5492801771871539
2	distmult	edge_pred	recall	0.8246051537822111
2	distmult	clf_kinase_substrate	au_roc	0.8127468927642355
2	distmult	clf_kinase_substrate	precision	0.7777777777777778
2	distmult	clf_kinase_substrate	recall	0.719626168224299
2	distmult	clf_ec	au_roc	0.7776942355889724
2	distmult	clf_ec	precision	0.7682926829268293
2	distmult	clf_ec	recall	0.6631578947368421
2	distmult	clf_ec_full	au_roc	0.6982638888888888
2	distmult	clf_ec_full	precision	0.6666666666666666
2	distmult	clf_ec_full	recall	0.65
2	node2vec_sg	edge_pred	au_roc	0.637001290069368
2	node2vec_sg	edge_pred	precision	0.5520833333333334
2	node2vec_sg	edge_pred	recall	0.6608478802992519
2	node2vec_sg	clf_kinase_substrate	au_roc	0.6441853743135176
2	node2vec_sg	clf_kinase_substrate	precision	0.603448275862069
2	node2vec_sg	clf_kinase_substrate	recall	0.6542056074766355
2	node2vec_sg	clf_ec	au_roc	0.7087092731829574
2	node2vec_sg	clf_ec	precision	0.6704545454545454
2	node2vec_sg	clf_ec	recall	0.6210526315789474
2	node2vec_sg	clf_ec_full	au_roc	0.6868055555555557
2	node2vec_sg	clf_ec_full	precision	0.6756756756756757
2	node2vec_sg	clf_ec_full	recall	0.625
2	node2vec_cbow	edge_pred	au_roc	0.7005743468980637
2	node2vec_cbow	edge_pred	precision	0.5328237410071942
2	node2vec_cbow	edge_pred	recall	0.9850374064837906
2	node2vec_cbow	clf_kinase_substrate	au_roc	0.7115329029771654
2	node2vec_cbow	clf_kinase_substrate	precision	0.7127659574468085
2	node2vec_cbow	clf_kinase_substrate	recall	0.6261682242990654
2	node2vec_cbow	clf_ec	au_roc	0.6607769423558897
2	node2vec_cbow	clf_ec	precision	0.6421052631578947
2	node2vec_cbow	clf_ec	recall	0.6421052631578947
2	node2vec_cbow	clf_ec_full	au_roc	0.7430555555555556
2	node2vec_cbow	clf_ec_full	precision	0.7037037037037037
2	node2vec_cbow	clf_ec_full	recall	0.475
2	transe	edge_pred	au_roc	0.6372134225257029
2	transe	edge_pred	precision	0.5424929178470255
2	transe	edge_pred	recall	0.9551122194513716
2	transe	clf_kinase_substrate	au_roc	0.6023701705366606
2	transe	clf_kinase_substrate	precision	0.625
2	transe	clf_kinase_substrate	recall	0.5607476635514018
2	transe	clf_ec	au_roc	0.5156015037593985
2	transe	clf_ec	precision	0.5384615384615384
2	transe	clf_ec	recall	0.4421052631578947
2	transe	clf_ec_full	au_roc	0.6048611111111111
2	transe	clf_ec_full	precision	0.6052631578947368
2	transe	clf_ec_full	recall	0.575
3	triple_walk_cbow	edge_pred	au_roc	0.6973377722222569
3	triple_walk_cbow	edge_pred	precision	0.5337807606263982
3	triple_walk_cbow	edge_pred	recall	0.9916874480465503
3	triple_walk_cbow	clf_kinase_substrate	au_roc	0.8863088929569323
3	triple_walk_cbow	clf_kinase_substrate	precision	0.8365384615384616
3	triple_walk_cbow	clf_kinase_substrate	recall	0.8130841121495327
3	triple_walk_cbow	clf_ec	au_roc	0.8462752525252526
3	triple_walk_cbow	clf_ec	precision	0.8767123287671232
3	triple_walk_cbow	clf_ec	recall	0.6464646464646465
3	triple_walk_cbow	clf_ec_full	au_roc	0.6967787114845939
3	triple_walk_cbow	clf_ec_full	precision	0.5531914893617021
3	triple_walk_cbow	clf_ec_full	recall	0.7647058823529411
3	triple_walk_sg	edge_pred	au_roc	0.8215430528693506
3	triple_walk_sg	edge_pred	precision	0.6428169014084507
3	triple_walk_sg	edge_pred	recall	0.9484621778886118
3	triple_walk_sg	clf_kinase_substrate	au_roc	0.6802196743424221
3	triple_walk_sg	clf_kinase_substrate	precision	0.6161616161616161
3	triple_walk_sg	clf_kinase_substrate	recall	0.5700934579439252
3	triple_walk_sg	clf_ec	au_roc	0.684469696969697
3	triple_walk_sg	clf_ec	precision	0.7272727272727273
3	triple_walk_sg	clf_ec	recall	0.48484848484848486
3	triple_walk_sg	clf_ec_full	au_roc	0.6246498599439776
3	triple_walk_sg	clf_ec_full	precision	0.5333333333333333
3	triple_walk_sg	clf_ec_full	recall	0.7058823529411765
3	deepwalk_sg	edge_pred	au_roc	0.6156850876411077
3	deepwalk_sg	edge_pred	precision	0.5373543522960932
3	deepwalk_sg	edge_pred	recall	0.6517040731504572
3	deepwalk_sg	clf_kinase_substrate	au_roc	0.5979381443298969
3	deepwalk_sg	clf_kinase_substrate	precision	0.5729166666666666
3	deepwalk_sg	clf_kinase_substrate	recall	0.514018691588785
3	deepwalk_sg	clf_ec	au_roc	0.7226641414141414
3	deepwalk_sg	clf_ec	precision	0.7215189873417721
3	deepwalk_sg	clf_ec	recall	0.5757575757575758
3	deepwalk_sg	clf_ec_full	au_roc	0.5213585434173669
3	deepwalk_sg	clf_ec_full	precision	0.48
3	deepwalk_sg	clf_ec_full	recall	0.7058823529411765
3	deepwalk_cbow	edge_pred	au_roc	0.7160848916777052
3	deepwalk_cbow	edge_pred	precision	0.5414543770264011
3	deepwalk_cbow	edge_pred	recall	0.971737323358271
3	deepwalk_cbow	clf_kinase_substrate	au_roc	0.6820984680605068
3	deepwalk_cbow	clf_kinase_substrate	precision	0.6829268292682927
3	deepwalk_cbow	clf_kinase_substrate	recall	0.5233644859813084
3	deepwalk_cbow	clf_ec	au_roc	0.7029671717171716
3	deepwalk_cbow	clf_ec	precision	0.7464788732394366
3	deepwalk_cbow	clf_ec	recall	0.5353535353535354
3	deepwalk_cbow	clf_ec_full	au_roc	0.7738095238095237
3	deepwalk_cbow	clf_ec_full	precision	0.6216216216216216
3	deepwalk_cbow	clf_ec_full	recall	0.6764705882352942
3	distmult	edge_pred	au_roc	0.6236946425844505
3	distmult	edge_pred	precision	0.5383655645664379
3	distmult	edge_pred	recall	0.7173732335827099
3	distmult	clf_kinase_substrate	au_roc	0.7946815685518837
3	distmult	clf_kinase_substrate	precision	0.7619047619047619
3	distmult	clf_kinase_substrate	recall	0.5981308411214953
3	distmult	clf_ec	au_roc	0.7613005050505051
3	distmult	clf_ec	precision	0.7794117647058824
3	distmult	clf_ec	recall	0.5353535353535354
3	distmult	clf_ec_full	au_roc	0.7051820728291317
3	distmult	clf_ec_full	precision	0.5641025641025641
3	distmult	clf_ec_full	recall	0.6470588235294118
3	node2vec_sg	edge_pred	au_roc	0.6352209667021141
3	node2vec_sg	edge_pred	precision	0.5367697594501718
3	node2vec_sg	edge_pred	recall	0.6492103075644223
3	node2vec_sg	clf_kinase_substrate	au_roc	0.5654687349455632
3	node2vec_sg	clf_kinase_substrate	precision	0.5636363636363636
3	node2vec_sg	clf_kinase_substrate	recall	0.5794392523364486
3	node2vec_sg	clf_ec	au_roc	0.7330808080808081
3	node2vec_sg	clf_ec	precision	0.6923076923076923
3	node2vec_sg	clf_ec	recall	0.6363636363636364
3	node2vec_sg	clf_ec_full	au_roc	0.6701680672268907
3	node2vec_sg	clf_ec_full	precision	0.5897435897435898
3	node2vec_sg	clf_ec_full	recall	0.6764705882352942
3	node2vec_cbow	edge_pred	au_roc	0.72666214762346
3	node2vec_cbow	edge_pred	precision	0.5323516287371709
3	node2vec_cbow	edge_pred	recall	0.9916874480465503
3	node2vec_cbow	clf_kinase_substrate	au_roc	0.7208305231717892
3	node2vec_cbow	clf_kinase_substrate	precision	0.7411764705882353
3	node2vec_cbow	clf_kinase_substrate	recall	0.5887850467289719
3	node2vec_cbow	clf_ec	au_roc	0.7258838383838384
3	node2vec_cbow	clf_ec	precision	0.7638888888888888
3	node2vec_cbow	clf_ec	recall	0.5555555555555556
3	node2vec_cbow	clf_ec_full	au_roc	0.7016806722689075
3	node2vec_cbow	clf_ec_full	precision	0.6444444444444445
3	node2vec_cbow	clf_ec_full	recall	0.8529411764705882
3	transe	edge_pred	au_roc	0.6044835265673445
3	transe	edge_pred	precision	0.5365740740740741
3	transe	edge_pred	recall	0.9634247714048213
3	transe	clf_kinase_substrate	au_roc	0.5469698429521148
3	transe	clf_kinase_substrate	precision	0.5974025974025974
3	transe	clf_kinase_substrate	recall	0.42990654205607476
3	transe	clf_ec	au_roc	0.5045454545454546
3	transe	clf_ec	precision	0.5432098765432098
3	transe	clf_ec	recall	0.4444444444444444
3	transe	clf_ec_full	au_roc	0.501750700280112
3	transe	clf_ec_full	precision	0.4411764705882353
3	transe	clf_ec_full	recall	0.4411764705882353
4	triple_walk_cbow	edge_pred	au_roc	0.7621411281991751
4	triple_walk_cbow	edge_pred	precision	0.5267618198037467
4	triple_walk_cbow	edge_pred	recall	0.9817123857024106
4	triple_walk_cbow	clf_kinase_substrate	au_roc	0.851063829787234
4	triple_walk_cbow	clf_kinase_substrate	precision	0.8913043478260869
4	triple_walk_cbow	clf_kinase_substrate	recall	0.7454545454545455
4	triple_walk_cbow	clf_ec	au_roc	0.7708020050125313
4	triple_walk_cbow	clf_ec	precision	0.717948717948718
4	triple_walk_cbow	clf_ec	recall	0.6666666666666666
4	triple_walk_cbow	clf_ec_full	au_roc	0.7508662508662509
4	triple_walk_cbow	clf_ec_full	precision	0.6585365853658537
4	triple_walk_cbow	clf_ec_full	recall	0.7297297297297297
4	triple_walk_sg	edge_pred	au_roc	0.7875576368029773
4	triple_walk_sg	edge_pred	precision	0.6074666666666667
4	triple_walk_sg	edge_pred	recall	0.9467996674979219
4	triple_walk_sg	clf_kinase_substrate	au_roc	0.687669245647969
4	triple_walk_sg	clf_kinase_substrate	precision	0.6767676767676768
4	triple_walk_sg	clf_kinase_substrate	recall	0.6090909090909091
4	triple_walk_sg	clf_ec	au_roc	0.6844611528822055
4	triple_walk_sg	clf_ec	precision	0.625
4	triple_walk_sg	clf_ec	recall	0.5952380952380952
4	triple_walk_sg	clf_ec_full	au_roc	0.5817740817740817
4	triple_walk_sg	clf_ec_full	precision	0.59375
4	triple_walk_sg	clf_ec_full	recall	0.5135135135135135
4	deepwalk_sg	edge_pred	au_roc	0.6015692964872386
4	deepwalk_sg	edge_pred	precision	0.5397520058351568
4	deepwalk_sg	edge_pred	recall	0.6151288445552785
4	deepwalk_sg	clf_kinase_substrate	au_roc	0.5740812379110252
4	deepwalk_sg	clf_kinase_substrate	precision	0.5875
4	deepwalk_sg	clf_kinase_substrate	recall	0.42727272727272725
4	deepwalk_sg	clf_ec	au_roc	0.699310776942356
4	deepwalk_sg	clf_ec	precision	0.6296296296296297
4	deepwalk_sg	clf_ec	recall	0.6071428571428571
4	deepwalk_sg	clf_ec_full	au_roc	0.6625086625086626
4	deepwalk_sg	clf_ec_full	precision	0.6410256410256411
4	deepwalk_sg	clf_ec_full	recall	0.6756756756756757
4	deepwalk_cbow	edge_pred	au_roc	0.667379417900248
4	deepwalk_cbow	edge_pred	precision	0.5438180956892468
4	deepwalk_cbow	edge_pred	recall	0.9542809642560266
4	deepwalk_cbow	clf_kinase_substrate	au_roc	0.684477756286267
4	deepwalk_cbow	clf_kinase_substrate	precision	0.7032967032967034
4	deepwalk_cbow	clf_kinase_substrate	recall	0.5818181818181818
4	deepwalk_cbow	clf_ec	au_roc	0.6942982456140351
4	deepwalk_cbow	clf_ec	precision	0.5977011494252874
4	deepwalk_cbow	clf_ec	recall	0.6190476190476191
4	deepwalk_cbow	clf_ec_full	au_roc	0.7085932085932086
4	deepwalk_cbow	clf_ec_full	precision	0.6052631578947368
4	deepwalk_cbow	clf_ec_full	recall	0.6216216216216216
4	distmult	edge_pred	au_roc	0.6407571401228157
4	distmult	edge_pred	precision	0.5564880568108457
4	distmult	edge_pred	recall	0.7165419783873649
4	distmult	clf_kinase_substrate	au_roc	0.7711798839458414
4	distmult	clf_kinase_substrate	precision	0.7976190476190477
4	distmult	clf_kinase_substrate	recall	0.6090909090909091
4	distmult	clf_ec	au_roc	0.6484335839598999
4	distmult	clf_ec	precision	0.5866666666666667
4	distmult	clf_ec	recall	0.5238095238095238
4	distmult	clf_ec_full	au_roc	0.7096327096327096
4	distmult	clf_ec_full	precision	0.6410256410256411
4	distmult	clf_ec_full	recall	0.6756756756756757
4	node2vec_sg	edge_pred	au_roc	0.6179218067328215
4	node2vec_sg	edge_pred	precision	0.5421428571428571
4	node2vec_sg	edge_pred	recall	0.6309226932668329
4	node2vec_sg	clf_kinase_substrate	au_roc	0.6449226305609285
4	node2vec_sg	clf_kinase_substrate	precision	0.6404494382022472
4	node2vec_sg	clf_kinase_substrate	recall	0.5181818181818182
4	node2vec_sg	clf_ec	au_roc	0.6706140350877192
4	node2vec_sg	clf_ec	precision	0.6046511627906976
4	node2vec_sg	clf_ec	recall	0.6190476190476191
4	node2vec_sg	clf_ec_full	au_roc	0.690921690921691
4	node2vec_sg	clf_ec_full	precision	0.6333333333333333
4	node2vec_sg	clf_ec_full	recall	0.5135135135135135
4	node2vec_cbow	edge_pred	au_roc	0.7201523760562573
4	node2vec_cbow	edge_pred	precision	0.5360217489805166
4	node2vec_cbow	edge_pred	recall	0.9833748960931006
4	node2vec_cbow	clf_kinase_substrate	au_roc	0.7224371373307544
4	node2vec_cbow	clf_kinase_substrate	precision	0.7395833333333334
4	node2vec_cbow	clf_kinase_substrate	recall	0.6454545454545455
4	node2vec_cbow	clf_ec	au_roc	0.6669172932330827
4	node2vec_cbow	clf_ec	precision	0.684931506849315
4	node2vec_cbow	clf_ec	recall	0.5952380952380952
4	node2vec_cbow	clf_ec_full	au_roc	0.7373527373527373
4	node2vec_cbow	clf_ec_full	precision	0.6222222222222222
4	node2vec_cbow	clf_ec_full	recall	0.7567567567567568
4	transe	edge_pred	au_roc	0.627699247309822
4	transe	edge_pred	precision	0.5256645279560037
4	transe	edge_pred	recall	0.9534497090606816
4	transe	clf_kinase_substrate	au_roc	0.5077852998065764
4	transe	clf_kinase_substrate	precision	0.525
4	transe	clf_kinase_substrate	recall	0.38181818181818183
4	transe	clf_ec	au_roc	0.5148496240601504
4	transe	clf_ec	precision	0.47191011235955055
4	transe	clf_ec	recall	0.5
4	transe	clf_ec_full	au_roc	0.5277200277200277
4	transe	clf_ec_full	precision	0.5
4	transe	clf_ec_full	recall	0.5405405405405406
5	triple_walk_cbow	edge_pred	au_roc	0.6528808209456962
5	triple_walk_cbow	edge_pred	precision	0.5245901639344263
5	triple_walk_cbow	edge_pred	recall	0.9842061512884456
5	triple_walk_cbow	clf_kinase_substrate	au_roc	0.8805874840357599
5	triple_walk_cbow	clf_kinase_substrate	precision	0.8725490196078431
5	triple_walk_cbow	clf_kinase_substrate	recall	0.7606837606837606
5	triple_walk_cbow	clf_ec	au_roc	0.8020599250936329
5	triple_walk_cbow	clf_ec	precision	0.7586206896551724
5	triple_walk_cbow	clf_ec	recall	0.7333333333333333
5	triple_walk_cbow	clf_ec_full	au_roc	0.6936274509803922
5	triple_walk_cbow	clf_ec_full	precision	0.5952380952380952
5	triple_walk_cbow	clf_ec_full	recall	0.7352941176470589
5	triple_walk_sg	edge_pred	au_roc	0.791542202957555
5	triple_walk_sg	edge_pred	precision	0.6118279569892473
5	triple_walk_sg	edge_pred	recall	0.9459684123025769
5	triple_walk_sg	clf_kinase_substrate	au_roc	0.6439728853521957
5	triple_walk_sg	clf_kinase_substrate	precision	0.6727272727272727
5	triple_walk_sg	clf_kinase_substrate	recall	0.6324786324786325
5	triple_walk_sg	clf_ec	au_roc	0.6903245942571785
5	triple_walk_sg	clf_ec	precision	0.6263736263736264
5	triple_walk_sg	clf_ec	recall	0.6333333333333333
5	triple_walk_sg	clf_ec_full	au_roc	0.41561624649859946
5	triple_walk_sg	clf_ec_full	precision	0.35294117647058826
5	triple_walk_sg	clf_ec_full	recall	0.35294117647058826
5	deepwalk_sg	edge_pred	au_roc	0.5955014099553002
5	deepwalk_sg	edge_pred	precision	0.5286855482933914
5	deepwalk_sg	edge_pred	recall	0.6051537822111388
5	deepwalk_sg	clf_kinase_substrate	au_roc	0.5927890755476963
5	deepwalk_sg	clf_kinase_substrate	precision	0.6555555555555556
5	deepwalk_sg	clf_kinase_substrate	recall	0.5042735042735043
5	deepwalk_sg	clf_ec	au_roc	0.6749687890137328
5	deepwalk_sg	clf_ec	precision	0.6111111111111112
5	deepwalk_sg	clf_ec	recall	0.6111111111111112
5	deepwalk_sg	clf_ec_full	au_roc	0.6561624649859944
5	deepwalk_sg	clf_ec_full	precision	0.575
5	deepwalk_sg	clf_ec_full	recall	0.6764705882352942
5	deepwalk_cbow	edge_pred	au_roc	0.730397613613514
5	deepwalk_cbow	edge_pred	precision	0.5409236396890718
5	deepwalk_cbow	edge_pred	recall	0.9833748960931006
5	deepwalk_cbow	clf_kinase_substrate	au_roc	0.7572944297082228
5	deepwalk_cbow	clf_kinase_substrate	precision	0.7764705882352941
5	deepwalk_cbow	clf_kinase_substrate	recall	0.5641025641025641
5	deepwalk_cbow	clf_ec	au_roc	0.743820224719101
5	deepwalk_cbow	clf_ec	precision	0.7058823529411765
5	deepwalk_cbow	clf_ec	recall	0.6666666666666666
5	deepwalk_cbow	clf_ec_full	au_roc	0.7303921568627452
5	deepwalk_cbow	clf_ec_full	precision	0.6410256410256411
5	deepwalk_cbow	clf_ec_full	recall	0.7352941176470589
5	distmult	edge_pred	au_roc	0.6435065702327722
5	distmult	edge_pred	precision	0.5621592148309705
5	distmult	edge_pred	recall	0.857024106400665
5	distmult	clf_kinase_substrate	au_roc	0.7808723843206602
5	distmult	clf_kinase_substrate	precision	0.8295454545454546
5	distmult	clf_kinase_substrate	recall	0.6239316239316239
5	distmult	clf_ec	au_roc	0.7073657927590511
5	distmult	clf_ec	precision	0.6666666666666666
5	distmult	clf_ec	recall	0.7333333333333333
5	distmult	clf_ec_full	au_roc	0.6736694677871149
5	distmult	clf_ec_full	precision	0.6097560975609756
5	distmult	clf_ec_full	recall	0.7352941176470589
5	node2vec_sg	edge_pred	au_roc	0.6130241036367242
5	node2vec_sg	edge_pred	precision	0.5351071692535108
5	node2vec_sg	edge_pred	recall	0.6018287614297589
5	node2vec_sg	clf_kinase_substrate	au_roc	0.5777090087434915
5	node2vec_sg	clf_kinase_substrate	precision	0.6
5	node2vec_sg	clf_kinase_substrate	recall	0.46153846153846156
5	node2vec_sg	clf_ec	au_roc	0.7299625468164794
5	node2vec_sg	clf_ec	precision	0.6853932584269663
5	node2vec_sg	clf_ec	recall	0.6777777777777778
5	node2vec_sg	clf_ec_full	au_roc	0.6677170868347339
5	node2vec_sg	clf_ec_full	precision	0.5625
5	node2vec_sg	clf_ec_full	recall	0.7941176470588235
5	node2vec_cbow	edge_pred	au_roc	0.7304287079475045
5	node2vec_cbow	edge_pred	precision	0.5335720680393913
5	node2vec_cbow	edge_pred	recall	0.9908561928512053
5	node2vec_cbow	clf_kinase_substrate	au_roc	0.629433146674526
5	node2vec_cbow	clf_kinase_substrate	precision	0.7
5	node2vec_cbow	clf_kinase_substrate	recall	0.47863247863247865
5	node2vec_cbow	clf_ec	au_roc	0.6602372034956305
5	node2vec_cbow	clf_ec	precision	0.6483516483516484
5	node2vec_cbow	clf_ec	recall	0.6555555555555556
5	node2vec_cbow	clf_ec_full	au_roc	0.6292016806722689
5	node2vec_cbow	clf_ec_full	precision	0.5135135135135135
5	node2vec_cbow	clf_ec_full	recall	0.5588235294117647
5	transe	edge_pred	au_roc	0.6076675863679676
5	transe	edge_pred	precision	0.5315522800552741
5	transe	edge_pred	recall	0.9592684954280964
5	transe	clf_kinase_substrate	au_roc	0.5292268395716672
5	transe	clf_kinase_substrate	precision	0.5970149253731343
5	transe	clf_kinase_substrate	recall	0.3418803418803419
5	transe	clf_ec	au_roc	0.47596754057428214
5	transe	clf_ec	precision	0.4946236559139785
5	transe	clf_ec	recall	0.5111111111111111
5	transe	clf_ec_full	au_roc	0.5420168067226891
5	transe	clf_ec_full	precision	0.3870967741935484
5	transe	clf_ec_full	recall	0.35294117647058826
6	triple_walk_cbow	edge_pred	au_roc	0.7009118931681603
6	triple_walk_cbow	edge_pred	precision	0.5250332299512628
6	triple_walk_cbow	edge_pred	recall	0.9850374064837906
6	triple_walk_cbow	clf_kinase_substrate	au_roc	0.8328993055555555
6	triple_walk_cbow	clf_kinase_substrate	precision	0.8252427184466019
6	triple_walk_cbow	clf_kinase_substrate	recall	0.7870370370370371
6	triple_walk_cbow	clf_ec	au_roc	0.8435157421289354
6	triple_walk_cbow	clf_ec	precision	0.8125
6	triple_walk_cbow	clf_ec	recall	0.7471264367816092
6	triple_walk_cbow	clf_ec_full	au_roc	0.7304227304227303
6	triple_walk_cbow	clf_ec_full	precision	0.7317073170731707
6	triple_walk_cbow	clf_ec_full	recall	0.7692307692307693
6	triple_walk_sg	edge_pred	au_roc	0.7977603787704471
6	triple_walk_sg	edge_pred	precision	0.6216361679224973
6	triple_walk_sg	edge_pred	recall	0.9600997506234414
6	triple_walk_sg	clf_kinase_substrate	au_roc	0.5867573302469136
6	triple_walk_sg	clf_kinase_substrate	precision	0.5842696629213483
6	triple_walk_sg	clf_kinase_substrate	recall	0.48148148148148145
6	triple_walk_sg	clf_ec	au_roc	0.6946526736631684
6	triple_walk_sg	clf_ec	precision	0.6263736263736264
6	triple_walk_sg	clf_ec	recall	0.6551724137931034
6	triple_walk_sg	clf_ec_full	au_roc	0.6503811503811503
6	triple_walk_sg	clf_ec_full	precision	0.6571428571428571
6	triple_walk_sg	clf_ec_full	recall	0.5897435897435898
6	deepwalk_sg	edge_pred	au_roc	0.5992012902075651
6	deepwalk_sg	edge_pred	precision	0.5211565585331452
6	deepwalk_sg	edge_pred	recall	0.6142975893599335
6	deepwalk_sg	clf_kinase_substrate	au_roc	0.5516010802469136
6	deepwalk_sg	clf_kinase_substrate	precision	0.6262626262626263
6	deepwalk_sg	clf_kinase_substrate	recall	0.5740740740740741
6	deepwalk_sg	clf_ec	au_roc	0.6276861569215393
6	deepwalk_sg	clf_ec	precision	0.6153846153846154
6	deepwalk_sg	clf_ec	recall	0.5517241379310345
6	deepwalk_sg	clf_ec_full	au_roc	0.6618156618156619
6	deepwalk_sg	clf_ec_full	precision	0.6190476190476191
6	deepwalk_sg	clf_ec_full	recall	0.6666666666666666
6	deepwalk_cbow	edge_pred	au_roc	0.6994407856778115
6	deepwalk_cbow	edge_pred	precision	0.5382136279926335
6	deepwalk_cbow	edge_pred	recall	0.971737323358271
6	deepwalk_cbow	clf_kinase_substrate	au_roc	0.7530381944444444
6	deepwalk_cbow	clf_kinase_substrate	precision	0.75
6	deepwalk_cbow	clf_kinase_substrate	recall	0.6666666666666666
6	deepwalk_cbow	clf_ec	au_roc	0.6852823588205896
6	deepwalk_cbow	clf_ec	precision	0.6111111111111112
6	deepwalk_cbow	clf_ec	recall	0.632183908045977
6	deepwalk_cbow	clf_ec_full	au_roc	0.7494802494802494
6	deepwalk_cbow	clf_ec_full	precision	0.696969696969697
6	deepwalk_cbow	clf_ec_full	recall	0.5897435897435898
6	distmult	edge_pred	au_roc	0.6658126089597287
6	distmult	edge_pred	precision	0.562532981530343
6	distmult	edge_pred	recall	0.8861180382377389
6	distmult	clf_kinase_substrate	au_roc	0.7571855709876543
6	distmult	clf_kinase_substrate	precision	0.7582417582417582
6	distmult	clf_kinase_substrate	recall	0.6388888888888888
6	distmult	clf_ec	au_roc	0.7204522738630685
6	distmult	clf_ec	precision	0.6823529411764706
6	distmult	clf_ec	recall	0.6666666666666666
6	distmult	clf_ec_full	au_roc	0.6427581427581428
6	distmult	clf_ec_full	precision	0.6341463414634146
6	distmult	clf_ec_full	recall	0.6666666666666666
6	node2vec_sg	edge_pred	au_roc	0.6091331659767178
6	node2vec_sg	edge_pred	precision	0.5286312849162011
6	node2vec_sg	edge_pred	recall	0.6292601828761429
6	node2vec_sg	clf_kinase_substrate	au_roc	0.5310088734567902
6	node2vec_sg	clf_kinase_substrate	precision	0.5555555555555556
6	node2vec_sg	clf_kinase_substrate	recall	0.5092592592592593
6	node2vec_sg	clf_ec	au_roc	0.6248125937031483
6	node2vec_sg	clf_ec	precision	0.57
6	node2vec_sg	clf_ec	recall	0.6551724137931034
6	node2vec_sg	clf_ec_full	au_roc	0.6704781704781705
6	node2vec_sg	clf_ec_full	precision	0.6136363636363636
6	node2vec_sg	clf_ec_full	recall	0.6923076923076923
6	node2vec_cbow	edge_pred	au_roc	0.7149361287830577
6	node2vec_cbow	edge_pred	precision	0.5302826379542396
6	node2vec_cbow	edge_pred	recall	0.9825436408977556
6	node2vec_cbow	clf_kinase_substrate	au_roc	0.6609278549382716
6	node2vec_cbow	clf_kinase_substrate	precision	0.65
6	node2vec_cbow	clf_kinase_substrate	recall	0.6018518518518519
6	node2vec_cbow	clf_ec	au_roc	0.6775362318840579
6	node2vec_cbow	clf_ec	precision	0.5977011494252874
6	node2vec_cbow	clf_ec	recall	0.5977011494252874
6	node2vec_cbow	clf_ec_full	au_roc	0.6472626472626473
6	node2vec_cbow	clf_ec_full	precision	0.625
6	node2vec_cbow	clf_ec_full	recall	0.6410256410256411
6	transe	edge_pred	au_roc	0.5912656706805997
6	transe	edge_pred	precision	0.5248419150858176
6	transe	edge_pred	recall	0.9659185369908562
6	transe	clf_kinase_substrate	au_roc	0.5792341820987655
6	transe	clf_kinase_substrate	precision	0.5393258426966292
6	transe	clf_kinase_substrate	recall	0.4444444444444444
6	transe	clf_ec	au_roc	0.5911419290354822
6	transe	clf_ec	precision	0.5714285714285714
6	transe	clf_ec	recall	0.5057471264367817
6	transe	clf_ec_full	au_roc	0.6663201663201663
6	transe	clf_ec_full	precision	0.6285714285714286
6	transe	clf_ec_full	recall	0.5641025641025641
7	triple_walk_cbow	edge_pred	au_roc	0.7555131981628085
7	triple_walk_cbow	edge_pred	precision	0.5209606986899563
7	triple_walk_cbow	edge_pred	recall	0.9916874480465503
7	triple_walk_cbow	clf_kinase_substrate	au_roc	0.8213461538461537
7	triple_walk_cbow	clf_kinase_substrate	precision	0.75
7	triple_walk_cbow	clf_kinase_substrate	recall	0.72
7	triple_walk_cbow	clf_ec	au_roc	0.8139724310776943
7	triple_walk_cbow	clf_ec	precision	0.6966292134831461
7	triple_walk_cbow	clf_ec	recall	0.7380952380952381
7	triple_walk_cbow	clf_ec_full	au_roc	0.5999999999999999
7	triple_walk_cbow	clf_ec_full	precision	0.6285714285714286
7	triple_walk_cbow	clf_ec_full	recall	0.4782608695652174
7	triple_walk_sg	edge_pred	au_roc	0.8198542850410687
7	triple_walk_sg	edge_pred	precision	0.6368186874304783
7	triple_walk_sg	edge_pred	recall	0.9517871986699917
7	triple_walk_sg	clf_kinase_substrate	au_roc	0.711201923076923
7	triple_walk_sg	clf_kinase_substrate	precision	0.6559139784946236
7	triple_walk_sg	clf_kinase_substrate	recall	0.61
7	triple_walk_sg	clf_ec	au_roc	0.7074561403508771
7	triple_walk_sg	clf_ec	precision	0.6363636363636364
7	triple_walk_sg	clf_ec	recall	0.6666666666666666
7	triple_walk_sg	clf_ec_full	au_roc	0.607608695652174
7	triple_walk_sg	clf_ec_full	precision	0.71875
7	triple_walk_sg	clf_ec_full	recall	0.5
7	deepwalk_sg	edge_pred	au_roc	0.5924697123912304
7	deepwalk_sg	edge_pred	precision	0.5229226361031518
7	deepwalk_sg	edge_pred	recall	0.6068162926018288
7	deepwalk_sg	clf_kinase_substrate	au_roc	0.5911538461538461
7	deepwalk_sg	clf_kinase_substrate	precision	0.5555555555555556
7	deepwalk_sg	clf_kinase_substrate	recall	0.55
7	deepwalk_sg	clf_ec	au_roc	0.6604010025062657
7	deepwalk_sg	clf_ec	precision	0.5833333333333334
7	deepwalk_sg	clf_ec	recall	0.5833333333333334
7	deepwalk_sg	clf_ec_full	au_roc	0.5898550724637681
7	deepwalk_sg	clf_ec_full	precision	0.6578947368421053
7	deepwalk_sg	clf_ec_full	recall	0.5434782608695652
7	deepwalk_cbow	edge_pred	au_roc	0.7201755240604502
7	deepwalk_cbow	edge_pred	precision	0.5333333333333333
7	deepwalk_cbow	edge_pred	recall	0.9908561928512053
7	deepwalk_cbow	clf_kinase_substrate	au_roc	0.7829807692307692
7	deepwalk_cbow	clf_kinase_substrate	precision	0.6952380952380952
7	deepwalk_cbow	clf_kinase_substrate	recall	0.73
7	deepwalk_cbow	clf_ec	au_roc	0.7780075187969925
7	deepwalk_cbow	clf_ec	precision	0.6777777777777778
7	deepwalk_cbow	clf_ec	recall	0.7261904761904762
7	deepwalk_cbow	clf_ec_full	au_roc	0.7119565217391304
7	deepwalk_cbow	clf_ec_full	precision	0.7272727272727273
7	deepwalk_cbow	clf_ec_full	recall	0.5217391304347826
7	distmult	edge_pred	au_roc	0.6348478346942287
7	distmult	edge_pred	precision	0.5451776649746193
7	distmult	edge_pred	recall	0.8927680798004988
7	distmult	clf_kinase_substrate	au_roc	0.7873557692307692
7	distmult	clf_kinase_substrate	precision	0.7848101265822784
7	distmult	clf_kinase_substrate	recall	0.62
7	distmult	clf_ec	au_roc	0.6495614035087719
7	distmult	clf_ec	precision	0.6046511627906976
7	distmult	clf_ec	recall	0.6190476190476191
7	distmult	clf_ec_full	au_roc	0.7644927536231884
7	distmult	clf_ec_full	precision	0.8695652173913043
7	distmult	clf_ec_full	recall	0.43478260869565216
7	node2vec_sg	edge_pred	au_roc	0.6228668423151045
7	node2vec_sg	edge_pred	precision	0.543002915451895
7	node2vec_sg	edge_pred	recall	0.6192851205320034
7	node2vec_sg	clf_kinase_substrate	au_roc	0.6393750000000001
7	node2vec_sg	clf_kinase_substrate	precision	0.5925925925925926
7	node2vec_sg	clf_kinase_substrate	recall	0.64
7	node2vec_sg	clf_ec	au_roc	0.7296992481203007
7	node2vec_sg	clf_ec	precision	0.6161616161616161
7	node2vec_sg	clf_ec	recall	0.7261904761904762
7	node2vec_sg	clf_ec_full	au_roc	0.45
7	node2vec_sg	clf_ec_full	precision	0.5483870967741935
7	node2vec_sg	clf_ec_full	recall	0.3695652173913043
7	node2vec_cbow	edge_pred	au_roc	0.7157622015894041
7	node2vec_cbow	edge_pred	precision	0.536003600360036
7	node2vec_cbow	edge_pred	recall	0.9900249376558603
7	node2vec_cbow	clf_kinase_substrate	au_roc	0.7195192307692307
7	node2vec_cbow	clf_kinase_substrate	precision	0.6534653465346535
7	node2vec_cbow	clf_kinase_substrate	recall	0.66
7	node2vec_cbow	clf_ec	au_roc	0.7151002506265666
7	node2vec_cbow	clf_ec	precision	0.6082474226804123
7	node2vec_cbow	clf_ec	recall	0.7023809523809523
7	node2vec_cbow	clf_ec_full	au_roc	0.568840579710145
7	node2vec_cbow	clf_ec_full	precision	0.6666666666666666
7	node2vec_cbow	clf_ec_full	recall	0.391304347826087
7	transe	edge_pred	au_roc	0.6295611069306507
7	transe	edge_pred	precision	0.528191249436175
7	transe	edge_pred	recall	0.9733998337489609
7	transe	clf_kinase_substrate	au_roc	0.6148076923076923
7	transe	clf_kinase_substrate	precision	0.6129032258064516
7	transe	clf_kinase_substrate	recall	0.57
7	transe	clf_ec	au_roc	0.437406015037594
7	transe	clf_ec	precision	0.43010752688172044
7	transe	clf_ec	recall	0.47619047619047616
7	transe	clf_ec_full	au_roc	0.6543478260869565
7	transe	clf_ec_full	precision	0.71875
7	transe	clf_ec_full	recall	0.5
8	triple_walk_cbow	edge_pred	au_roc	0.7423416382844497
8	triple_walk_cbow	edge_pred	precision	0.5154549412276883
8	triple_walk_cbow	edge_pred	recall	0.9842061512884456
8	triple_walk_cbow	clf_kinase_substrate	au_roc	0.8194070080862534
8	triple_walk_cbow	clf_kinase_substrate	precision	0.77
8	triple_walk_cbow	clf_kinase_substrate	recall	0.7264150943396226
8	triple_walk_cbow	clf_ec	au_roc	0.7999750124937531
8	triple_walk_cbow	clf_ec	precision	0.7733333333333333
8	triple_walk_cbow	clf_ec	recall	0.6304347826086957
8	triple_walk_cbow	clf_ec_full	au_roc	0.5644599303135889
8	triple_walk_cbow	clf_ec_full	precision	0.5333333333333333
8	triple_walk_cbow	clf_ec_full	recall	0.6857142857142857
8	triple_walk_sg	edge_pred	au_roc	0.780306438116402
8	triple_walk_sg	edge_pred	precision	0.6182999458581484
8	triple_walk_sg	edge_pred	recall	0.9492934330839568
8	triple_walk_sg	clf_kinase_substrate	au_roc	0.7059587986137852
8	triple_walk_sg	clf_kinase_substrate	precision	0.6631578947368421
8	triple_walk_sg	clf_kinase_substrate	recall	0.5943396226415094
8	triple_walk_sg	clf_ec	au_roc	0.6812843578210893
8	triple_walk_sg	clf_ec	precision	0.6153846153846154
8	triple_walk_sg	clf_ec	recall	0.5217391304347826
8	triple_walk_sg	clf_ec_full	au_roc	0.4637630662020906
8	triple_walk_sg	clf_ec_full	precision	0.4634146341463415
8	triple_walk_sg	clf_ec_full	recall	0.5428571428571428
8	deepwalk_sg	edge_pred	au_roc	0.6213442564273716
8	deepwalk_sg	edge_pred	precision	0.5267284390591589
8	deepwalk_sg	edge_pred	recall	0.6142975893599335
8	deepwalk_sg	clf_kinase_substrate	au_roc	0.5901520985752793
8	deepwalk_sg	clf_kinase_substrate	precision	0.5825242718446602
8	deepwalk_sg	clf_kinase_substrate	recall	0.5660377358490566
8	deepwalk_sg	clf_ec	au_roc	0.735944527736132
8	deepwalk_sg	clf_ec	precision	0.6867469879518072
8	deepwalk_sg	clf_ec	recall	0.6195652173913043
8	deepwalk_sg	clf_ec_full	au_roc	0.6275261324041811
8	deepwalk_sg	clf_ec_full	precision	0.5555555555555556
8	deepwalk_sg	clf_ec_full	recall	0.7142857142857143
8	deepwalk_cbow	edge_pred	au_roc	0.7107183551235516
8	deepwalk_cbow	edge_pred	precision	0.538006372325899
8	deepwalk_cbow	edge_pred	recall	0.9825436408977556
8	deepwalk_cbow	clf_kinase_substrate	au_roc	0.7256931074316519
8	deepwalk_cbow	clf_kinase_substrate	precision	0.7176470588235294
8	deepwalk_cbow	clf_kinase_substrate	recall	0.5754716981132075
8	deepwalk_cbow	clf_ec	au_roc	0.7335082458770615
8	deepwalk_cbow	clf_ec	precision	0.7341772151898734
8	deepwalk_cbow	clf_ec	recall	0.6304347826086957
8	deepwalk_cbow	clf_ec_full	au_roc	0.7630662020905924
8	deepwalk_cbow	clf_ec_full	precision	0.6444444444444445
8	deepwalk_cbow	clf_ec_full	recall	0.8285714285714286
8	distmult	edge_pred	au_roc	0.6588720081204581
8	distmult	edge_pred	precision	0.5463800904977375
8	distmult	edge_pred	recall	0.8029925187032418
8	distmult	clf_kinase_substrate	au_roc	0.8143530997304582
8	distmult	clf_kinase_substrate	precision	0.8072289156626506
8	distmult	clf_kinase_substrate	recall	0.6320754716981132
8	distmult	clf_ec	au_roc	0.6927786106946526
8	distmult	clf_ec	precision	0.7
8	distmult	clf_ec	recall	0.6086956521739131
8	distmult	clf_ec_full	au_roc	0.691637630662021
8	distmult	clf_ec_full	precision	0.5306122448979592
8	distmult	clf_ec_full	recall	0.7428571428571429
8	node2vec_sg	edge_pred	au_roc	0.6196395959394946
8	node2vec_sg	edge_pred	precision	0.5409717186366932
8	node2vec_sg	edge_pred	recall	0.6201163757273483
8	node2vec_sg	clf_kinase_substrate	au_roc	0.6663457835964574
8	node2vec_sg	clf_kinase_substrate	precision	0.6470588235294118
8	node2vec_sg	clf_kinase_substrate	recall	0.6226415094339622
8	node2vec_sg	clf_ec	au_roc	0.7080209895052474
8	node2vec_sg	clf_ec	precision	0.6585365853658537
8	node2vec_sg	clf_ec	recall	0.5869565217391305
8	node2vec_sg	clf_ec_full	au_roc	0.681184668989547
8	node2vec_sg	clf_ec_full	precision	0.5434782608695652
8	node2vec_sg	clf_ec_full	recall	0.7142857142857143
8	node2vec_cbow	edge_pred	au_roc	0.7140558136385277
8	node2vec_cbow	edge_pred	precision	0.5347159603246168
8	node2vec_cbow	edge_pred	recall	0.9858686616791354
8	node2vec_cbow	clf_kinase_substrate	au_roc	0.6848767809010397
8	node2vec_cbow	clf_kinase_substrate	precision	0.6931818181818182
8	node2vec_cbow	clf_kinase_substrate	recall	0.5754716981132075
8	node2vec_cbow	clf_ec	au_roc	0.6719765117441279
8	node2vec_cbow	clf_ec	precision	0.6625
8	node2vec_cbow	clf_ec	recall	0.5760869565217391
8	node2vec_cbow	clf_ec_full	au_roc	0.7623693379790941
8	node2vec_cbow	clf_ec_full	precision	0.6078431372549019
8	node2vec_cbow	clf_ec_full	recall	0.8857142857142857
8	transe	edge_pred	au_roc	0.6258456795113905
8	transe	edge_pred	precision	0.5317496573777981
8	transe	edge_pred	recall	0.9675810473815462
8	transe	clf_kinase_substrate	au_roc	0.5539083557951483
8	transe	clf_kinase_substrate	precision	0.5411764705882353
8	transe	clf_kinase_substrate	recall	0.4339622641509434
8	transe	clf_ec	au_roc	0.456896551724138
8	transe	clf_ec	precision	0.5
8	transe	clf_ec	recall	0.45652173913043476
8	transe	clf_ec_full	au_roc	0.6090592334494773
8	transe	clf_ec_full	precision	0.5609756097560976
8	transe	clf_ec_full	recall	0.6571428571428571
9	triple_walk_cbow	edge_pred	au_roc	0.7171644043067433
9	triple_walk_cbow	edge_pred	precision	0.5187772925764192
9	triple_walk_cbow	edge_pred	recall	0.9883527454242929
9	triple_walk_cbow	clf_kinase_substrate	au_roc	0.8563368055555555
9	triple_walk_cbow	clf_kinase_substrate	precision	0.8064516129032258
9	triple_walk_cbow	clf_kinase_substrate	recall	0.78125
9	triple_walk_cbow	clf_ec	au_roc	0.7653381946190596
9	triple_walk_cbow	clf_ec	precision	0.6904761904761905
9	triple_walk_cbow	clf_ec	recall	0.7073170731707317
9	triple_walk_cbow	clf_ec_full	au_roc	0.6625
9	triple_walk_cbow	clf_ec_full	precision	0.6216216216216216
9	triple_walk_cbow	clf_ec_full	recall	0.575
9	triple_walk_sg	edge_pred	au_roc	0.7633903975902615
9	triple_walk_sg	edge_pred	precision	0.6186854970124932
9	triple_walk_sg	edge_pred	recall	0.9475873544093179
9	triple_walk_sg	clf_kinase_substrate	au_roc	0.679542824074074
9	triple_walk_sg	clf_kinase_substrate	precision	0.6129032258064516
9	triple_walk_sg	clf_kinase_substrate	recall	0.59375
9	triple_walk_sg	clf_ec	au_roc	0.6439527281870756
9	triple_walk_sg	clf_ec	precision	0.5526315789473685
9	triple_walk_sg	clf_ec	recall	0.5121951219512195
9	triple_walk_sg	clf_ec_full	au_roc	0.5190972222222223
9	triple_walk_sg	clf_ec_full	precision	0.5625
9	triple_walk_sg	clf_ec_full	recall	0.45
9	deepwalk_sg	edge_pred	au_roc	0.5967048125558899
9	deepwalk_sg	edge_pred	precision	0.538781163434903
9	deepwalk_sg	edge_pred	recall	0.6472545757071547
9	deepwalk_sg	clf_kinase_substrate	au_roc	0.5334683641975309
9	deepwalk_sg	clf_kinase_substrate	precision	0.5232558139534884
9	deepwalk_sg	clf_kinase_substrate	recall	0.46875
9	deepwalk_sg	clf_ec	au_roc	0.7149861704802615
9	deepwalk_sg	clf_ec	precision	0.6046511627906976
9	deepwalk_sg	clf_ec	recall	0.6341463414634146
9	deepwalk_sg	clf_ec_full	au_roc	0.5885416666666666
9	deepwalk_sg	clf_ec_full	precision	0.631578947368421
9	deepwalk_sg	clf_ec_full	recall	0.6
9	deepwalk_cbow	edge_pred	au_roc	0.7332973884346943
9	deepwalk_cbow	edge_pred	precision	0.5344749887336638
9	deepwalk_cbow	edge_pred	recall	0.9866888519134775
9	deepwalk_cbow	clf_kinase_substrate	au_roc	0.7310474537037037
9	deepwalk_cbow	clf_kinase_substrate	precision	0.6666666666666666
9	deepwalk_cbow	clf_kinase_substrate	recall	0.6666666666666666
9	deepwalk_cbow	clf_ec	au_roc	0.7181292431481017
9	deepwalk_cbow	clf_ec	precision	0.6410256410256411
9	deepwalk_cbow	clf_ec	recall	0.6097560975609756
9	deepwalk_cbow	clf_ec_full	au_roc	0.6746527777777778
9	deepwalk_cbow	clf_ec_full	precision	0.7027027027027027
9	deepwalk_cbow	clf_ec_full	recall	0.65
9	distmult	edge_pred	au_roc	0.6442752788613542
9	distmult	edge_pred	precision	0.5411899313501144
9	distmult	edge_pred	recall	0.7870216306156406
9	distmult	clf_kinase_substrate	au_roc	0.8096064814814814
9	distmult	clf_kinase_substrate	precision	0.7848101265822784
9	distmult	clf_kinase_substrate	recall	0.6458333333333334
9	distmult	clf_ec	au_roc	0.6693487553432234
9	distmult	clf_ec	precision	0.6049382716049383
9	distmult	clf_ec	recall	0.5975609756097561
9	distmult	clf_ec_full	au_roc	0.5670138888888889
9	distmult	clf_ec_full	precision	0.5227272727272727
9	distmult	clf_ec_full	recall	0.575
9	node2vec_sg	edge_pred	au_roc	0.6293493788776887
9	node2vec_sg	edge_pred	precision	0.5424791086350975
9	node2vec_sg	edge_pred	recall	0.6480865224625624
9	node2vec_sg	clf_kinase_substrate	au_roc	0.5602816358024691
9	node2vec_sg	clf_kinase_substrate	precision	0.5257731958762887
9	node2vec_sg	clf_kinase_substrate	recall	0.53125
9	node2vec_sg	clf_ec	au_roc	0.6778979129997486
9	node2vec_sg	clf_ec	precision	0.6265060240963856
9	node2vec_sg	clf_ec	recall	0.6341463414634146
9	node2vec_sg	clf_ec_full	au_roc	0.5565972222222222
9	node2vec_sg	clf_ec_full	precision	0.5813953488372093
9	node2vec_sg	clf_ec_full	recall	0.625
9	node2vec_cbow	edge_pred	au_roc	0.6863034709206232
9	node2vec_cbow	edge_pred	precision	0.5308035714285714
9	node2vec_cbow	edge_pred	recall	0.9891846921797005
9	node2vec_cbow	clf_kinase_substrate	au_roc	0.7240065586419754
9	node2vec_cbow	clf_kinase_substrate	precision	0.6631578947368421
9	node2vec_cbow	clf_kinase_substrate	recall	0.65625
9	node2vec_cbow	clf_ec	au_roc	0.6101961277344732
9	node2vec_cbow	clf_ec	precision	0.49019607843137253
9	node2vec_cbow	clf_ec	recall	0.6097560975609756
9	node2vec_cbow	clf_ec_full	au_roc	0.6416666666666667
9	node2vec_cbow	clf_ec_full	precision	0.6206896551724138
9	node2vec_cbow	clf_ec_full	recall	0.45
9	transe	edge_pred	au_roc	0.6336510004125127
9	transe	edge_pred	precision	0.5341701534170153
9	transe	edge_pred	recall	0.9559068219633944
9	transe	clf_kinase_substrate	au_roc	0.5945698302469136
9	transe	clf_kinase_substrate	precision	0.5333333333333333
9	transe	clf_kinase_substrate	recall	0.5
9	transe	clf_ec	au_roc	0.5379054563741514
9	transe	clf_ec	precision	0.5
9	transe	clf_ec	recall	0.6097560975609756
9	transe	clf_ec_full	au_roc	0.5336805555555555
9	transe	clf_ec_full	precision	0.5116279069767442
9	transe	clf_ec_full	recall	0.55
